# Supplementary material for: Safety of ezetimibe in lipid-lowering treatment: systematic review and meta-analysis of randomised controlled trials and cohort studies
Source: PubMed Central journal article supplement — BMJ Med. 2022 May 3;1(1):e000134. doi: 10.1136/bmjmed-2022-000134 (PMC10012858; doi:10.1136/bmjmed-2022-000134), 2022-05-03
Supplement: bmjmed-2022-000134supp001.pdf [file bmjmed-2022-000134supp001.pdf]

**Safety of ezetimibe: A systematic review and meta-analysis****Appendix Figures and Tables****CONTENTS**

Figure S1 Risk of bias graph

Figure S2 Risk of bias summary

Figure S3 Subgroup analyses based on follow-up duration

Figure S4 Subgroup analyses based on type of control

Figure S5 Subgroup analyses based on risk of bias

Figure S6 Effect of ezetimibe on any cancer

Figure S7 Effect of ezetimibe on new-onset diabetes mellitus

Figure S8 Effect of ezetimibe on neurocognitive events

Figure S9 Effect of ezetimibe on any fracture

Figure S10 Effect of ezetimibe on myalgia or muscular pain leading to discontinuation

Figure S11 Effect of ezetimibe on discontinuation due to any gastrointestinal adverse events

Figure S12 Effect of ezetimibe on discontinuation due to any adverse effect

Figure S13 Sensitivity analysis using the fixed-effect model in any cancer reporting trials

Figure S14 Sensitivity analysis using the fixed-effect model in new-onset diabetes mellitus reporting trials

Figure S15 Sensitivity analysis using the fixed-effect model in neurocognitive events reporting trials

Figure S16 Sensitivity analysis using the fixed-effect model in any fracture reporting trials

Figure S17 Sensitivity analysis using the fixed-effect model in myalgia or muscular pain leading to discontinuation reporting trials

Figure S18 Sensitivity analysis using the fixed-effect model in discontinuation due to any gastrointestinal adverse events reporting trials

Figure S19 Sensitivity analysis using the fixed-effect model in discontinuation due to any adverse effect reporting trials

Table S1 PRISMA checklist

Table S2 MOOSE checklist

Table S3 Search strategy for randomized controlled trials

Table S4 Search strategy for observational studies

Table S5 Rationale of excluding studies during the full-text screening of randomized controlled trials

Table S6 Rationale of excluding studies during the full-text screening of observational studies

Table S7 Baseline Characteristics of each included randomized controlled trial

Table S8 Summary of subgroup analyses

Table S9 Summary of Begg's rank correlation test and Egger's linear regression test

Table S10 Baseline characteristics of the included observational studies

Table S11 Risk of bias of included observational studies

Table S12 Summary of previously published meta-analyses on the effects of ezetimibe on safety outcomes

Table S13 Meta-regression according to different baseline LDL-c levels

**Figure S1 Risk of bias graph for randomized controlled trials**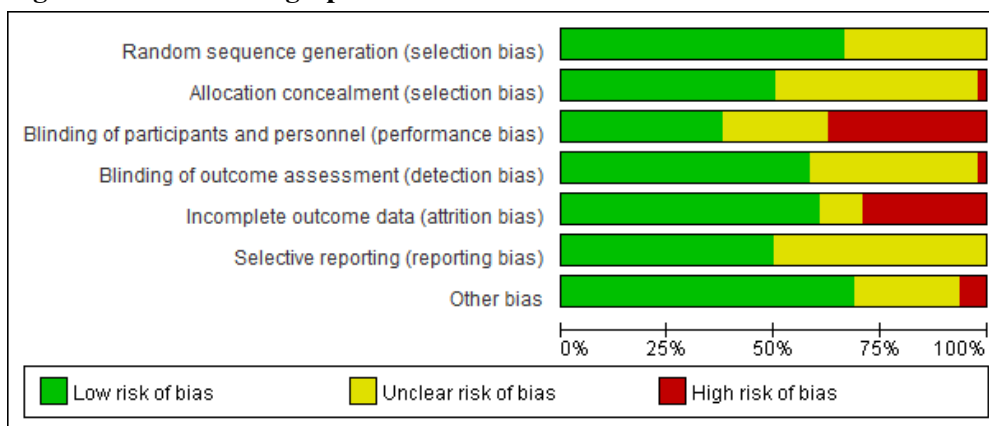

**Figure S2 Risk of bias summary for randomized controlled trials**

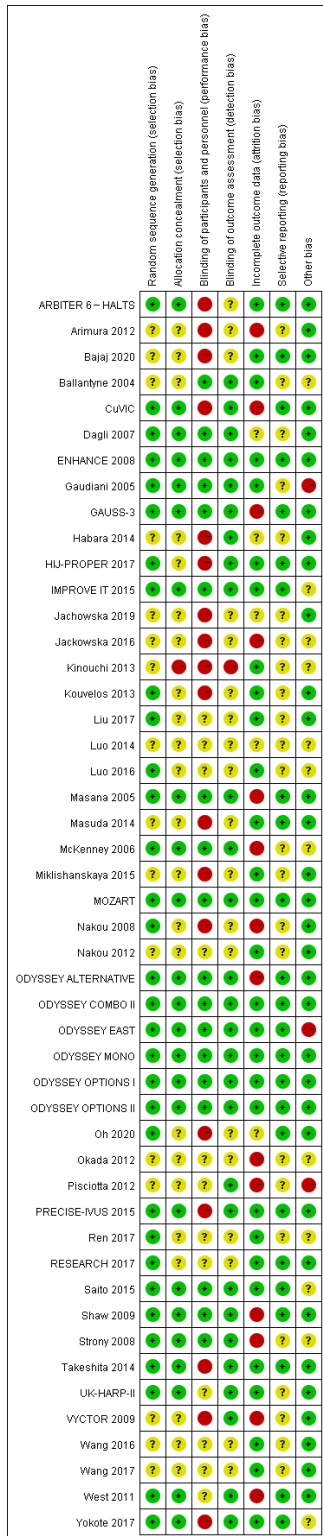

Figure S3 Subgroup analyses based on follow-up duration

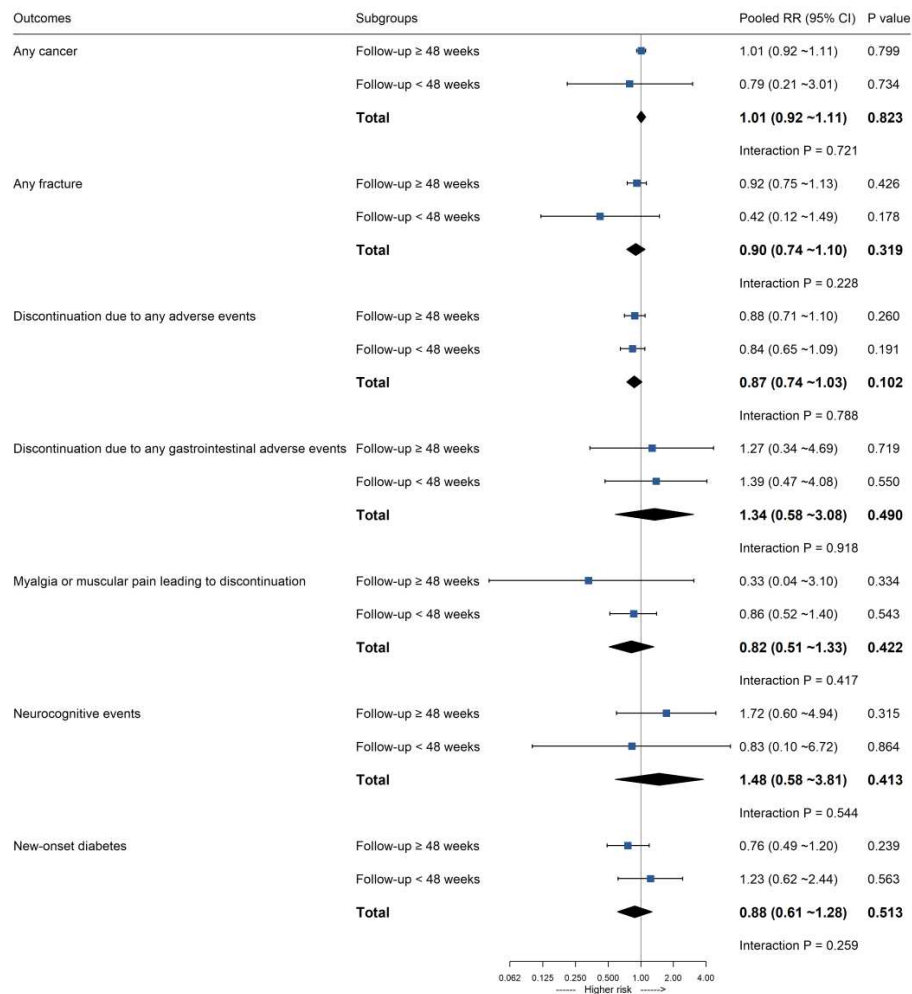

Abbreviations: CI, confidence interval; RR, relative ratio; DM, diabetes mellitus

Figure S4 Subgroup analyses based on type of control

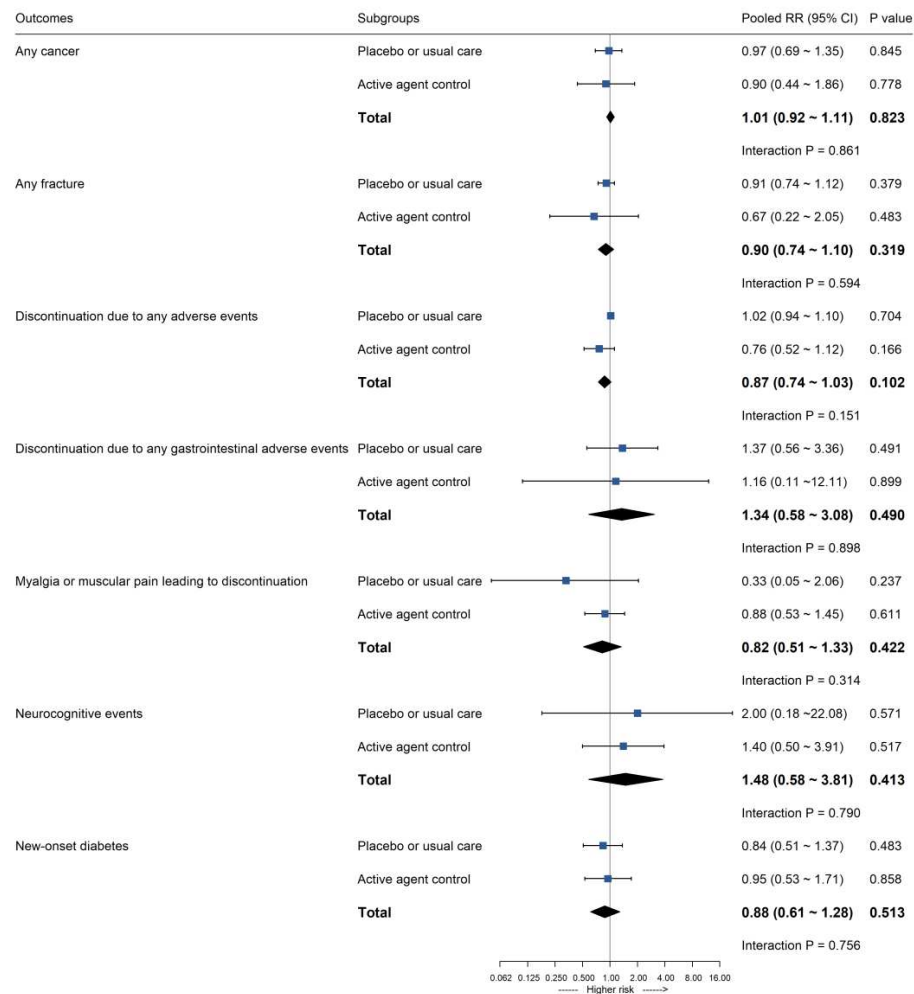

Abbreviations: CI, confidence interval; RR, relative ratio; DM, diabetes mellitus

Figure S5 Subgroup analyses based on risk of bias

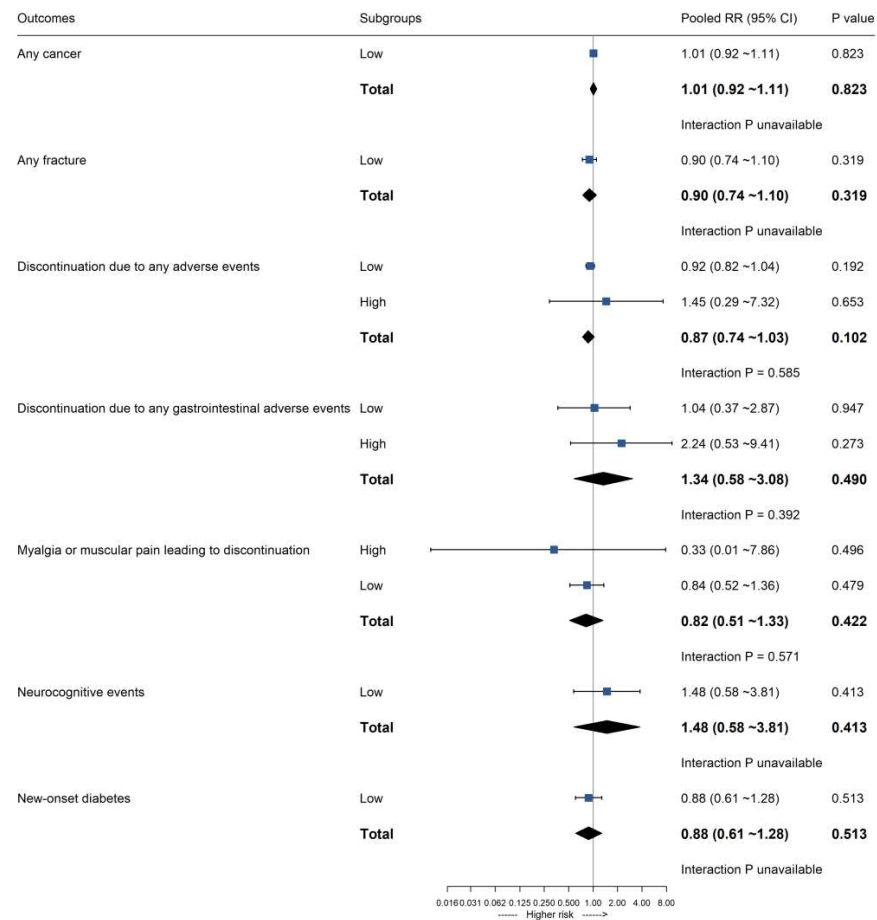

Abbreviations: CI, confidence interval; RR, relative ratio; DM, diabetes mellitus

Figure S6 Effect of ezetimibe on any cancer in randomized controlled trials

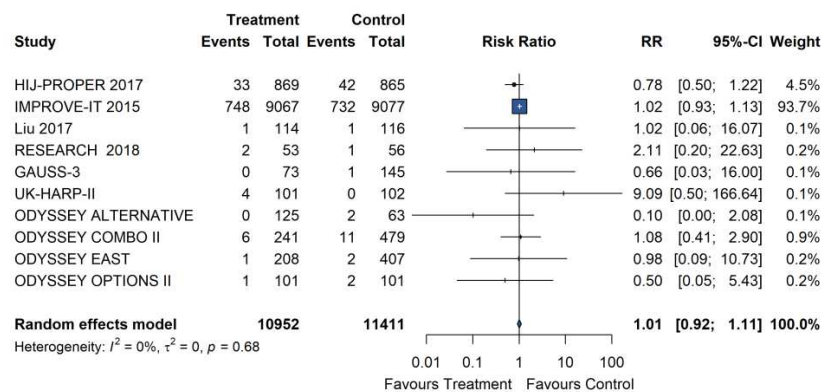

Abbreviations: CI, confidence interval; RR, relative ratio



**Figure S7 Effect of ezetimibe on new-onset diabetes mellitus in randomized controlled trials**

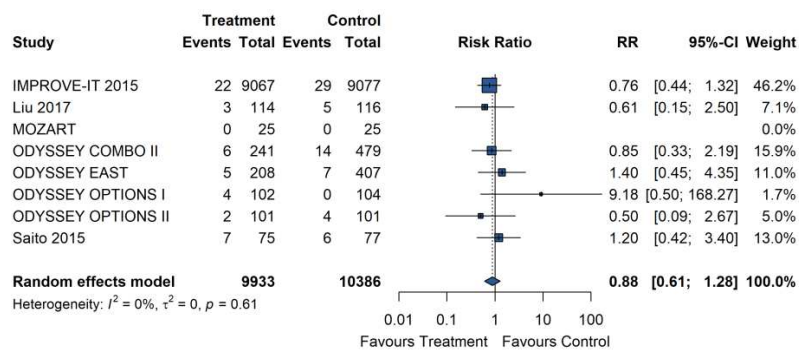

Abbreviations: CI, confidence interval; RR, relative ratio

**Figure S8 Effect of ezetimibe on neurocognitive events in randomized controlled trials**

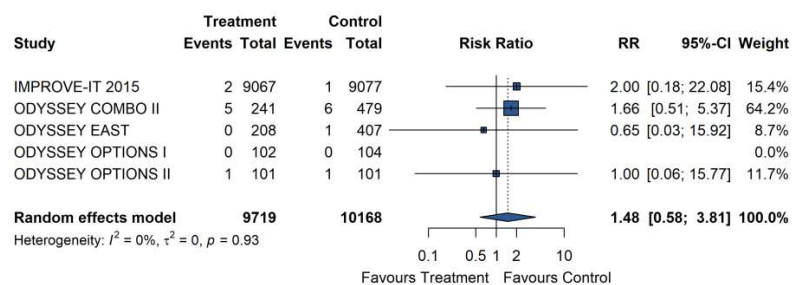

Abbreviations: CI, confidence interval; RR, relative ratio

**Figure S9 Effect of ezetimibe on any fracture in randomized controlled trials**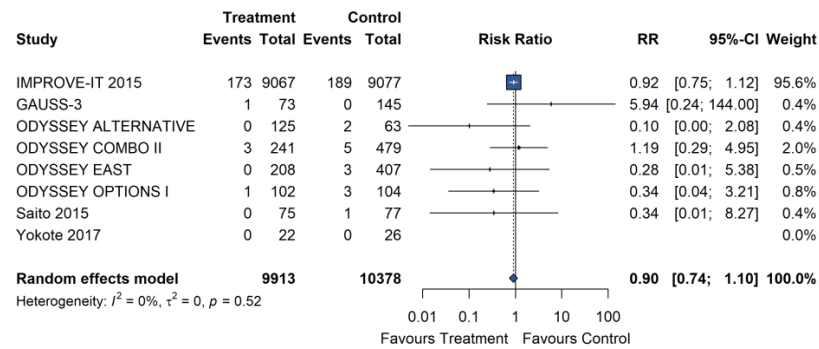

Abbreviations: CI, confidence interval; RR, relative ratio

**Figure S10 Effect of ezetimibe on myalgia or muscular pain leading to discontinuation**

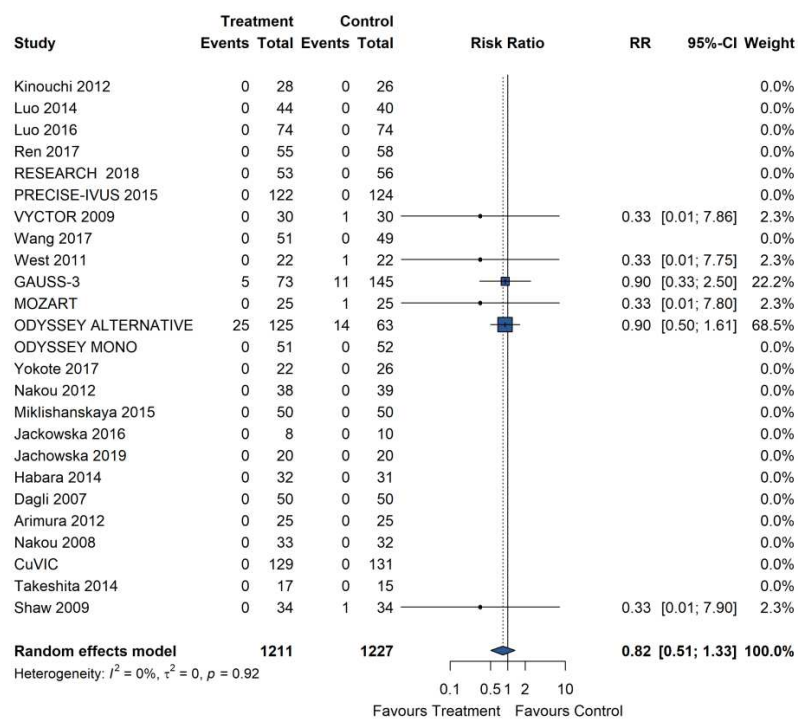

Abbreviations: CI, confidence interval; RR, relative ratio

**Figure S11 Effect of ezetimibe on discontinuation due to any gastrointestinal adverse events in randomized controlled trials**

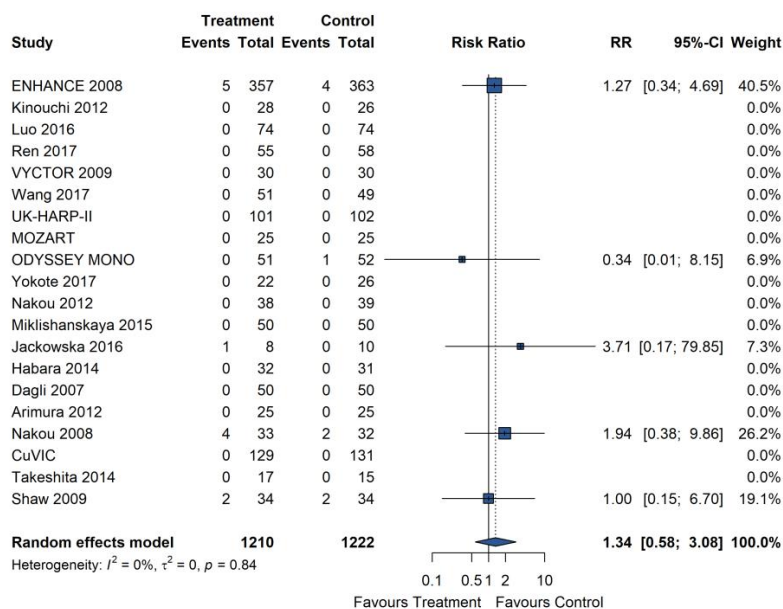

Abbreviations: CI, confidence interval; RR, relative ratio

**Figure S12 Effect of ezetimibe on discontinuation due to any adverse effect in randomized controlled trials**

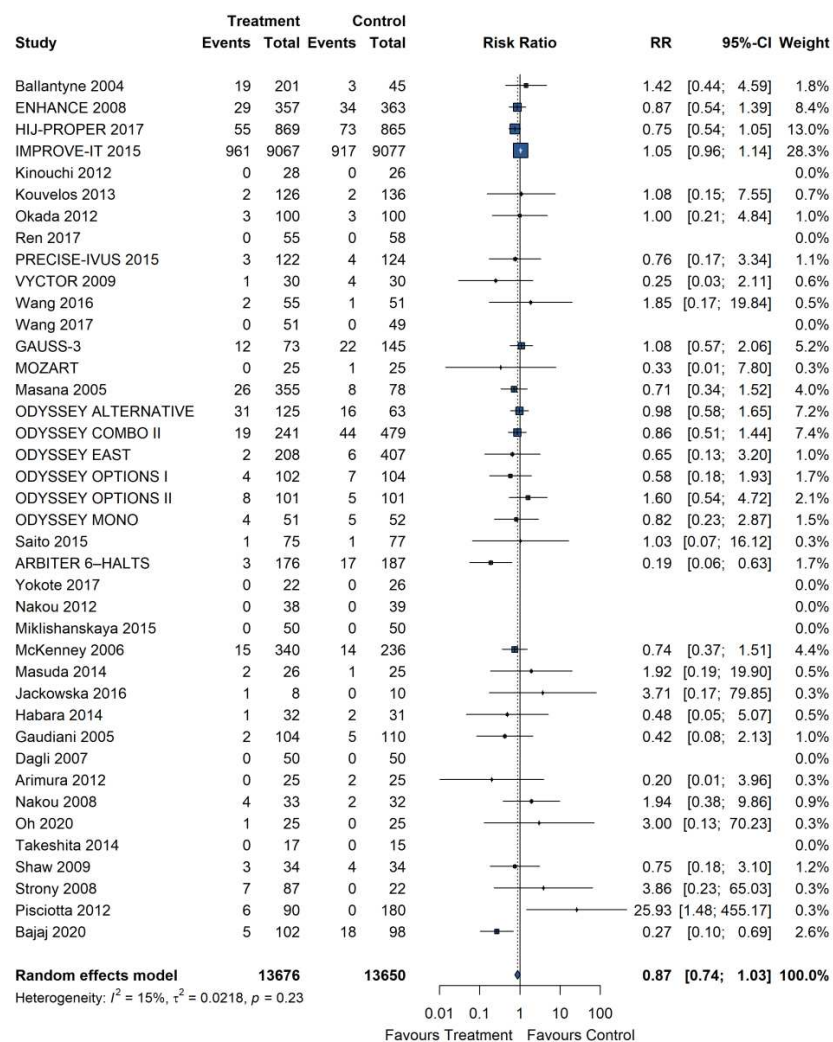

Abbreviations: CI, confidence interval; RR, relative ratio

**Figure S13 Sensitivity analysis using the fixed-effect model in any cancer in randomized controlled trials**

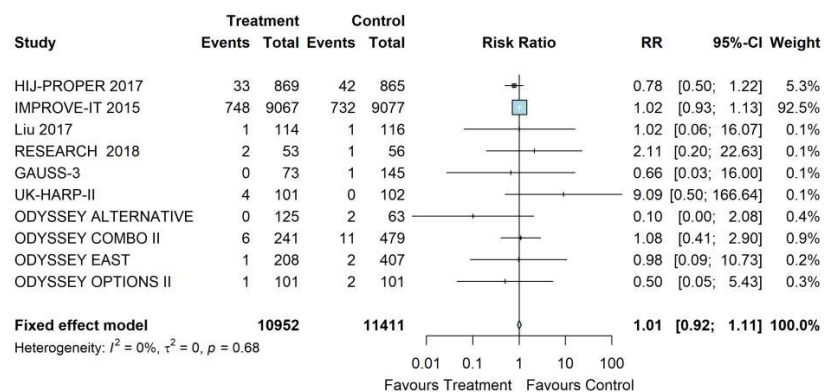

Abbreviations: CI, confidence interval; RR, relative ratio

**Figure S14 Sensitivity analysis using the fixed-effect model in new-onset diabetes mellitus in randomized controlled trials**

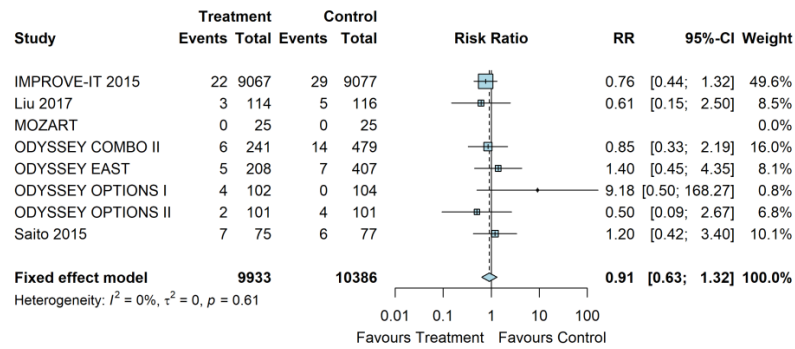

Abbreviations: CI, confidence interval; RR, relative ratio



**Figure S15 Sensitivity analysis using the fixed-effect model in neurocognitive events in randomized controlled trials**

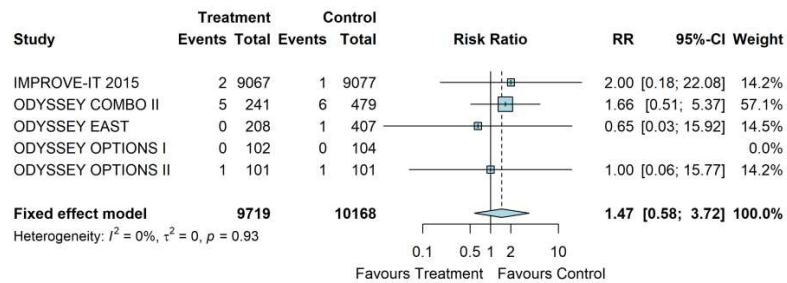

Abbreviations: CI, confidence interval; RR, relative ratio

**Figure S16 Sensitivity analysis using the fixed-effect model in any fracture in randomized controlled trials**

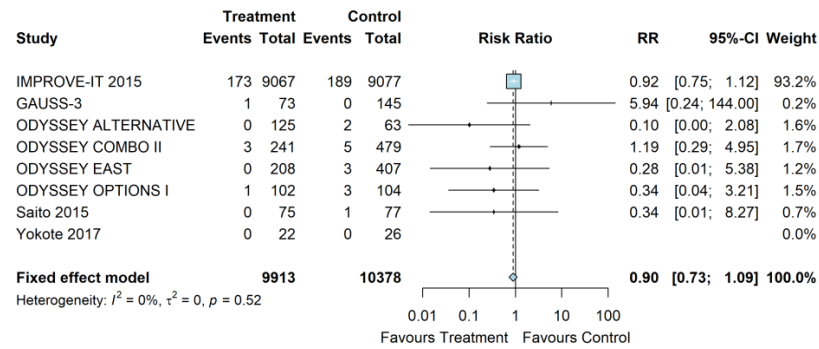

Abbreviations: CI, confidence interval; RR, relative ratio

**Figure S17 Sensitivity analysis using the fixed-effect model in myalgia or muscular pain leading to discontinuation in randomized controlled trials**

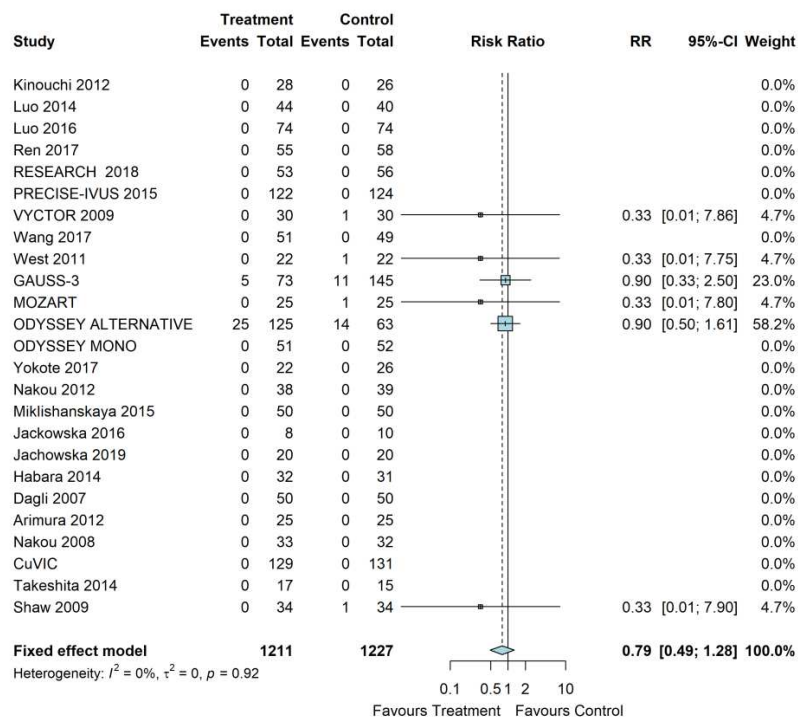

Abbreviations: CI, confidence interval; RR, relative ratio

**Figure S18 Sensitivity analysis using the fixed-effect model in discontinuation due to any gastrointestinal adverse events in randomized controlled trials**

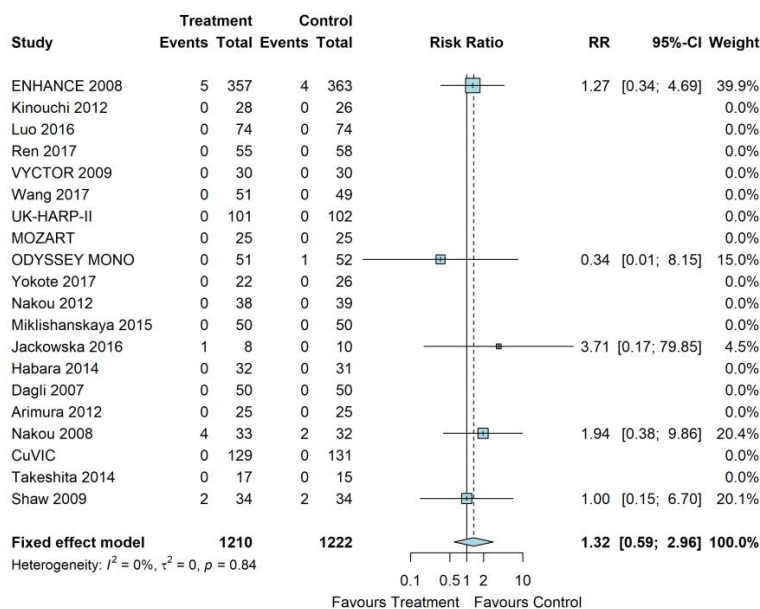

Abbreviations: CI, confidence interval; RR, relative ratio

**Figure S19 Sensitivity analysis using the fixed-effect model in discontinuation due to any adverse effect in randomized controlled trials**

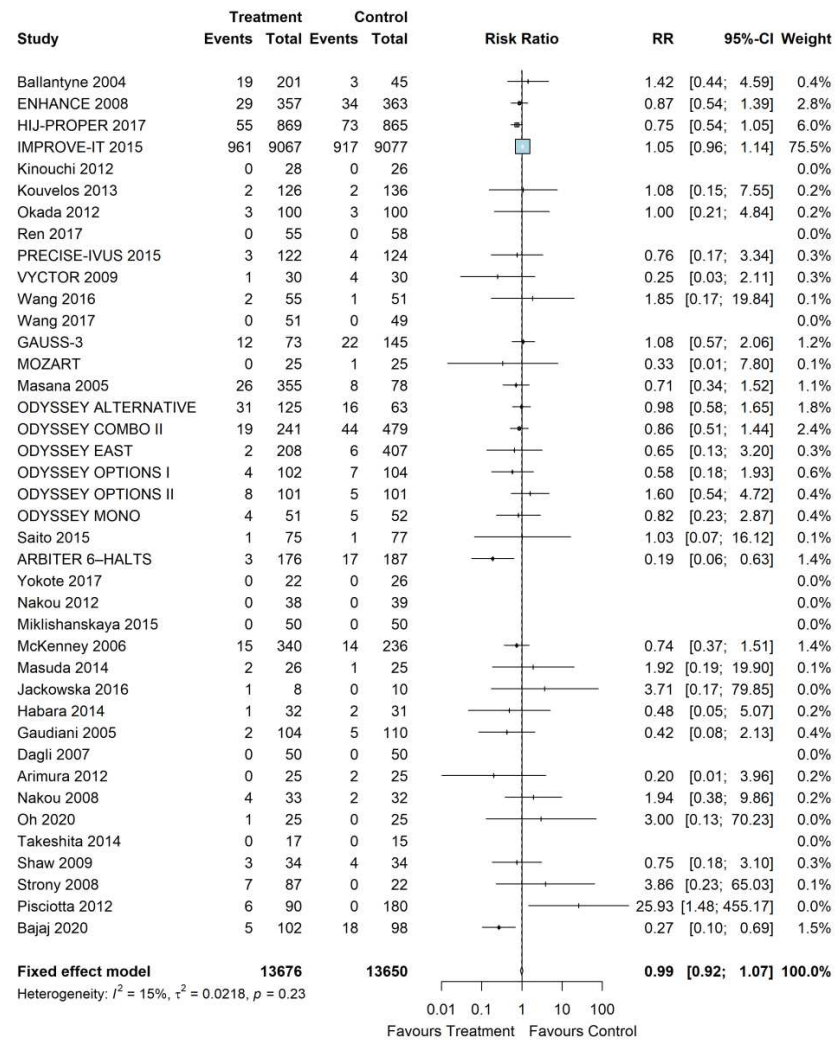

Abbreviations: CI, confidence interval; RR, relative ratio

**Table S1 PRISMA checklist**

| Section/topic                      | #  | Checklist item                                                                                                                                                                                                                                                                                              | Reported on page |
|------------------------------------|----|-------------------------------------------------------------------------------------------------------------------------------------------------------------------------------------------------------------------------------------------------------------------------------------------------------------|------------------|
| <b>TITLE</b>                       |    |                                                                                                                                                                                                                                                                                                             | Page 1           |
| Title                              | 1  | Identify the report as a systematic review, meta-analysis, or both.                                                                                                                                                                                                                                         | Page 1           |
| <b>ABSTRACT</b>                    |    |                                                                                                                                                                                                                                                                                                             | Page 3           |
| Structured summary                 | 2  | Provide a structured summary including, as applicable: background; objectives; data sources; study eligibility criteria, participants, and interventions; study appraisal and synthesis methods; results; limitations; conclusions and implications of key findings; systematic review registration number. | Page 3           |
| <b>INTRODUCTION</b>                |    |                                                                                                                                                                                                                                                                                                             | Page 5           |
| Rationale                          | 3  | Describe the rationale for the review in the context of what is already known.                                                                                                                                                                                                                              | Page 5           |
| Objectives                         | 4  | Provide an explicit statement of questions being addressed with reference to participants, interventions, comparisons, outcomes, and study design (PICOS).                                                                                                                                                  | Page 5           |
| <b>METHODS</b>                     |    |                                                                                                                                                                                                                                                                                                             | Page 5-9         |
| Protocol and registration          | 5  | Indicate if a review protocol exists, if and where it can be accessed (e.g., Web address), and, if available, provide registration information including registration number.                                                                                                                               | Page 6           |
| Eligibility criteria               | 6  | Specify study characteristics (e.g., PICOS, length of follow-up) and report characteristics (e.g., years considered, language, publication status) used as criteria for eligibility, giving rationale.                                                                                                      | Page 6-7         |
| Information sources                | 7  | Describe all information sources (e.g., databases with dates of coverage, contact with study authors to identify additional studies) in the search and date last searched.                                                                                                                                  | Page 6           |
| Search                             | 8  | Present full electronic search strategy for at least one database, including any limits used, such that it could be repeated.                                                                                                                                                                               | Page 6           |
| Study selection                    | 9  | State the process for selecting studies (i.e., screening, eligibility, included in systematic review, and, if applicable, included in the meta-analysis).                                                                                                                                                   | Page 6-7         |
| Data collection process            | 10 | Describe method of data extraction from reports (e.g., piloted forms, independently, in duplicate) and any processes for obtaining and confirming data from investigators.                                                                                                                                  | Page 7           |
| Data items                         | 11 | List and define all variables for which data were sought (e.g., PICOS, funding sources) and any assumptions and simplifications made.                                                                                                                                                                       | Page 7           |
| Risk of bias in individual studies | 12 | Describe methods used for assessing risk of bias of individual studies (including specification of whether this was done at the study or outcome level), and how this information is to be used in any data synthesis.                                                                                      | Page 7-8         |
| Summary measures                   | 13 | State the principal summary measures (e.g., risk ratio, difference in means).                                                                                                                                                                                                                               | Page 8           |
| Synthesis of results               | 14 | Describe the methods of handling data and combining results of studies, if done, including measures of consistency (e.g., $I^2$ ) for each meta-analysis.                                                                                                                                                   | Page 8           |
| Risk of bias across studies        | 15 | Specify any assessment of risk of bias that may affect the cumulative evidence (e.g., publication bias, selective reporting within studies).                                                                                                                                                                | Page 8           |
| Additional analyses                | 16 | Describe methods of additional analyses (e.g., sensitivity or subgroup analyses, meta-regression), if done, indicating which were pre-specified.                                                                                                                                                            | Page 8           |

|                               |    |                                                                                                                                                                                                          |            |
|-------------------------------|----|----------------------------------------------------------------------------------------------------------------------------------------------------------------------------------------------------------|------------|
| <b>RESULTS</b>                |    |                                                                                                                                                                                                          | Page 9-11  |
| Study selection               | 17 | Give numbers of studies screened, assessed for eligibility, and included in the review, with reasons for exclusions at each stage, ideally with a flow diagram.                                          | Page 9     |
| Study characteristics         | 18 | For each study, present characteristics for which data were extracted (e.g., study size, PICOS, follow-up period) and provide the citations.                                                             | Page 9     |
| Risk of bias within studies   | 19 | Present data on risk of bias of each study and, if available, any outcome level assessment (see item 12).                                                                                                | Page 9-10  |
| Results of individual studies | 20 | For all outcomes considered (benefits or harms), present, for each study: (a) simple summary data for each intervention group (b) effect estimates and confidence intervals, ideally with a forest plot. | Page 10    |
| Synthesis of results          | 21 | Present results of each meta-analysis done, including confidence intervals and measures of consistency.                                                                                                  | Page 10-11 |
| Risk of bias across studies   | 22 | Present results of any assessment of risk of bias across studies (see Item 15).                                                                                                                          | Page 9     |
| Additional analysis           | 23 | Give results of additional analyses, if done (e.g., sensitivity or subgroup analyses, meta-regression [see Item 16]).                                                                                    | Page 11    |
| <b>DISCUSSION</b>             |    |                                                                                                                                                                                                          | Page 11-13 |
| Summary of evidence           | 24 | Summarize the main findings including the strength of evidence for each main outcome; consider their relevance to key groups (e.g., healthcare providers, users, and policy makers).                     | Page 11-12 |
| Limitations                   | 25 | Discuss limitations at study and outcome level (e.g., risk of bias), and at review-level (e.g., incomplete retrieval of identified research, reporting bias).                                            | Page 12-13 |
| Conclusions                   | 26 | Provide a general interpretation of the results in the context of other evidence, and implications for future research.                                                                                  | Page 13    |
| <b>FUNDING</b>                |    |                                                                                                                                                                                                          | Page 13    |
| Funding                       | 27 | Describe sources of funding for the systematic review and other support (e.g., supply of data); role of funders for the systematic review.                                                               | Page 13    |

**Table S2 MOOSE Checklist**

| #                                                  | Checklist item                                                                                                                                                                                                                                                               | Reported on Page        |
|----------------------------------------------------|------------------------------------------------------------------------------------------------------------------------------------------------------------------------------------------------------------------------------------------------------------------------------|-------------------------|
| <b>Reporting of background should include</b>      |                                                                                                                                                                                                                                                                              |                         |
| 1                                                  | Problem definition                                                                                                                                                                                                                                                           | Page 5                  |
| 2                                                  | Hypothesis statement                                                                                                                                                                                                                                                         | Page 5                  |
| 3                                                  | Description of study outcome(s)                                                                                                                                                                                                                                              | Page 5                  |
| 4                                                  | Type of exposure or intervention used                                                                                                                                                                                                                                        | Page 5                  |
| 5                                                  | Type of study designs used                                                                                                                                                                                                                                                   | Page 5                  |
| 6                                                  | Study population                                                                                                                                                                                                                                                             | Page 5                  |
| <b>Reporting of search strategy should include</b> |                                                                                                                                                                                                                                                                              |                         |
| 7                                                  | Qualifications of searchers (eg, librarians and investigators)                                                                                                                                                                                                               | Page 5-6                |
| 8                                                  | Search strategy, including time period included in the synthesis and keywords                                                                                                                                                                                                | Page 5-6                |
| 9                                                  | Effort to include all available studies, including contact with authors                                                                                                                                                                                                      | Page 5-6                |
| 10                                                 | Databases and registries searched                                                                                                                                                                                                                                            | Page 5-6                |
| 11                                                 | Search software used, name and version, including special features used (eg, explosion)                                                                                                                                                                                      | Page 5-6                |
| 12                                                 | Use of hand searching (eg, reference lists of obtained articles)                                                                                                                                                                                                             | Page 5-6                |
| 13                                                 | List of citations located and those excluded, including justification                                                                                                                                                                                                        | Page 5-6                |
| 14                                                 | Method of addressing articles published in languages other than English                                                                                                                                                                                                      | Page 5-6                |
| 15                                                 | Method of handling abstracts and unpublished studies                                                                                                                                                                                                                         | Page 5-6                |
| 16                                                 | Description of any contact with authors                                                                                                                                                                                                                                      | Page 5-6                |
| <b>Reporting of methods should include</b>         |                                                                                                                                                                                                                                                                              |                         |
| 17                                                 | Description of relevance or appropriateness of studies assembled for assessing the hypothesis to be tested                                                                                                                                                                   | Page 5-6                |
| 18                                                 | Rationale for the selection and coding of data (eg, sound clinical principles or convenience)                                                                                                                                                                                | Page 5-6                |
| 19                                                 | Documentation of how data were classified and coded (eg, multiple raters, blinding, and interrater reliability)                                                                                                                                                              | Page 5-6                |
| 20                                                 | Assessment of confounding (eg, comparability of cases and controls in studies where appropriate)                                                                                                                                                                             | Page 5-6                |
| 21                                                 | Assessment of study quality, including blinding of quality assessors; stratification or regression on possible predictors of study results                                                                                                                                   | Page 5-6                |
| 22                                                 | Assessment of heterogeneity                                                                                                                                                                                                                                                  | Page 7-8                |
| 23                                                 | Description of statistical methods (eg, complete description of fixed or random effects models, justification of whether the chosen models account for predictors of study results, dose-response models, or cumulative meta-analysis) in sufficient detail to be replicated | Page 7-8                |
| 24                                                 | Provision of appropriate tables and graphics                                                                                                                                                                                                                                 | Page 7-8                |
| <b>Reporting of results should include</b>         |                                                                                                                                                                                                                                                                              |                         |
| 25                                                 | Graphic summarizing individual study estimates and overall estimate                                                                                                                                                                                                          | Figure 2                |
| 26                                                 | Table giving descriptive information for each study included                                                                                                                                                                                                                 | Table 1                 |
| 27                                                 | Results of sensitivity testing (eg, subgroup analysis)                                                                                                                                                                                                                       | Figure S13-19, Table S8 |
| 28                                                 | Indication of statistical uncertainty of findings                                                                                                                                                                                                                            | Page 9-11               |
| <b>Reporting of discussion should include</b>      |                                                                                                                                                                                                                                                                              |                         |
| 29                                                 | Quantitative assessment of bias (eg, publication bias)                                                                                                                                                                                                                       | Page 11-13              |
| 30                                                 | Justification for exclusion (eg, exclusion of non-English-language citations)                                                                                                                                                                                                | Page 11-13              |
| 31                                                 | Assessment of quality of included studies                                                                                                                                                                                                                                    | Page 11-13              |
| <b>Reporting of conclusions should include</b>     |                                                                                                                                                                                                                                                                              |                         |
| 32                                                 | Consideration of alternative explanations for observed results                                                                                                                                                                                                               | Page 13                 |
| 33                                                 | Generalization of the conclusions (ie, appropriate for the data presented and within the domain of the literature review)                                                                                                                                                    | Page 13                 |
| 34                                                 | Guidelines for future research                                                                                                                                                                                                                                               | Page 13                 |



|    |                              |         |
|----|------------------------------|---------|
| 35 | Disclosure of funding source | Page 13 |
|----|------------------------------|---------|

**Table S3 Search strategy for randomized controlled trials**

CENTRAL (Last searching date: 9 July, 2021)

|     |                                                    |
|-----|----------------------------------------------------|
| #1  | MeSH descriptor: [Ezetimibe] explode all trees     |
| #2  | (ezetimibe or ezetimib)                            |
| #3  | ezetrol                                            |
| #4  | zetia                                              |
| #5  | vytorin                                            |
| #6  | inegy                                              |
| #7  | SCH-58235                                          |
| #8  | SCH 58235                                          |
| #9  | SCH58235                                           |
| #10 | #1 or #2 or #3 or #4 or #5 or #6 or #7 or #8 or #9 |

MEDLINE Ovid (1946 to July 08, 2021)

|     |                                              |
|-----|----------------------------------------------|
| 1.  | exp ezetimibe/                               |
| 2.  | (ezetimibe or ezetimib).tw.                  |
| 3.  | ezetrol.tw.                                  |
| 4.  | zetia.tw.                                    |
| 5.  | vytorin.tw.                                  |
| 6.  | inegy.tw.                                    |
| 7.  | SCH-58235.tw.                                |
| 8.  | SCH 58235.tw.                                |
| 9.  | SCH58235.tw.                                 |
| 10. | 1 or 2 or 3 or 4 or 5 or 6 or 7 or 8 or 9    |
| 11. | randomized controlled trial.pt.              |
| 12. | controlled clinical trial.pt.                |
| 13. | randomized.ab.                               |
| 14. | placebo.ab.                                  |
| 15. | drug therapy.fs.                             |
| 16. | randomly.ab.                                 |
| 17. | trial.ab.                                    |
| 18. | groups.ab.                                   |
| 19. | 11 or 12 or 13 or 14 or 15 or 16 or 17 or 18 |
| 20. | exp animals/ not humans.sh.                  |
| 21. | 19 not 20                                    |
| 22. | 10 and 21                                    |

Embase Ovid (1974 to 2021 July 08)

|    |                             |
|----|-----------------------------|
| 1. | exp ezetimibe/              |
| 2. | (ezetimibe or ezetimib).tw. |
| 3. | ezetrol.tw.                 |
| 4. | zetia.tw.                   |
| 5. | vytorin.tw.                 |
| 6. | inegy.tw.                   |
| 7. | SCH-58235.tw.               |

|     |                                                                                        |
|-----|----------------------------------------------------------------------------------------|
| 8.  | SCH 58235.tw.                                                                          |
| 9.  | SCH58235.tw.                                                                           |
| 10. | 1 or 2 or 3 or 4 or 5 or 6 or 7 or 8 or 9                                              |
| 11. | random\$.tw.                                                                           |
| 12. | factorial\$.tw.                                                                        |
| 13. | crossover\$.tw.                                                                        |
| 14. | cross over\$.tw.                                                                       |
| 15. | cross-over\$.tw.                                                                       |
| 16. | placebo\$.tw.                                                                          |
| 17. | (doubl\$ adj blind\$.tw.                                                               |
| 18. | (singl\$ adj blind\$.tw.                                                               |
| 19. | assign\$.tw.                                                                           |
| 20. | allocat\$.tw.                                                                          |
| 21. | volunteer\$.tw.                                                                        |
| 22. | crossover procedure/                                                                   |
| 23. | double blind procedure/                                                                |
| 24. | randomized controlled trial/                                                           |
| 25. | single blind procedure/                                                                |
| 26. | 11 or 12 or 13 or 14 or 15 or 16 or 17 or 18 or 19 or 20 or 21 or 22 or 23 or 24 or 25 |
| 27. | (animal/ or nonhuman/) not human/                                                      |
| 28. | 26 not 27                                                                              |
| 29. | 10 and 28                                                                              |

ClinicalTrials.gov (Last searching date: 12 July, 2021)

|               |                                                  |
|---------------|--------------------------------------------------|
| Intervention: | ezetimibe                                        |
| Condition:    | cardiovascular OR hyperlipidemia OR dyslipidemia |
| Study type:   | Intervention studies                             |

**Table S4 Search strategy for observational studies**

MEDLINE Ovid (1946 to July 15, 2021)

|     |                                                 |
|-----|-------------------------------------------------|
| 1.  | exp ezetimibe/                                  |
| 2.  | (ezetimibe or ezetimib).tw.                     |
| 3.  | ezetrol.tw.                                     |
| 4.  | zetia.tw.                                       |
| 5.  | vytorin.tw.                                     |
| 6.  | inegy.tw.                                       |
| 7.  | SCH-58235.tw.                                   |
| 8.  | SCH 58235.tw.                                   |
| 9.  | SCH58235.tw.                                    |
| 10. | 1 or 2 or 3 or 4 or 5 or 6 or 7 or 8 or 9       |
| 11. | exp Cohort Studies/ or cohort*.mp.              |
| 12. | exp Longitudinal Studies/ or longitudinal.mp.   |
| 13. | exp Prospective Studies/ or prospective.mp.     |
| 14. | exp Retrospective Studies/ or retrospective.mp. |
| 15. | observational.mp. or exp Observational Study/   |
| 16. | exp Follow-up Studies/ or follow-up.mp.         |
| 17. | population-base*.mp.                            |
| 18. | 11 or 12 or 13 or 14 or 15 or 16 or 17          |
| 19. | 10 and 18                                       |

Embase Ovid (1974 to 2021 July 15)

|     |                                                                            |
|-----|----------------------------------------------------------------------------|
| 1.  | exp ezetimibe/                                                             |
| 2.  | (ezetimibe or ezetimib).tw.                                                |
| 3.  | ezetrol.tw.                                                                |
| 4.  | zetia.tw.                                                                  |
| 5.  | vytorin.tw.                                                                |
| 6.  | inegy.tw.                                                                  |
| 7.  | SCH-58235.tw.                                                              |
| 8.  | SCH 58235.tw.                                                              |
| 9.  | SCH58235.tw.                                                               |
| 10. | 1 or 2 or 3 or 4 or 5 or 6 or 7 or 8 or 9                                  |
| 11. | exp cohort analysis/ or cohort*.mp.                                        |
| 12. | longitudinal.mp. or exp longitudinal study/                                |
| 13. | exp prospective study/ or prospective.mp.                                  |
| 14. | exp retrospective study/ or retrospective.mp.                              |
| 15. | exp observational study/ or exp observational method/ or observational.mp. |
| 16. | follow-up.mp. or exp follow up/                                            |
| 17. | population-base*.mp.                                                       |
| 18. | 11 or 12 or 13 or 14 or 15 or 16 or 17                                     |
| 19. | 10 and 18                                                                  |



**Table S5 Rational of excluding studies during the full-text screening of randomized controlled trials**

| <b>Title</b>                                                                                                                                                                                                                                                                                                                                                | <b>Reason for exclusion</b>               |
|-------------------------------------------------------------------------------------------------------------------------------------------------------------------------------------------------------------------------------------------------------------------------------------------------------------------------------------------------------------|-------------------------------------------|
| Ezetimibe add-on to statin therapy for effectiveness trial (EASE) <sup>1</sup>                                                                                                                                                                                                                                                                              | Follow-up duration is less than 24 weeks. |
| More news from IMPROVE-IT (Improved reduction of outcomes: vytorin efficacy international trial) <sup>2</sup>                                                                                                                                                                                                                                               | It's an editorial.                        |
| Changes in lipoprotein lipase and endothelial lipase mass in familial hypercholesterolemia during three-drug lipid-lowering combination therapy <sup>3</sup>                                                                                                                                                                                                | The comparison is not eligible.           |
| Response by takase and matoba to letter regarding article, "ezetimibe in combination with statins ameliorates endothelial dysfunction in coronary arteries after stenting: the cuvic trial (effect of cholesterol absorption inhibitor usage on target vessel dysfunction after coronary stenting), a multicenter randomized controlled trial" <sup>4</sup> | It's a reply.                             |
| Rationale and design of a randomized trial of automated hovering for post-myocardial infarction patients: the HeartStrong program <sup>5</sup>                                                                                                                                                                                                              | The comparison is not eligible.           |
| Letter by westerink and visseren regarding article, "ezetimibe in combination with statins ameliorates endothelial dysfunction in coronary arteries after stenting: the cuvic trial (effect of cholesterol absorption inhibitor usage on target vessel dysfunction after coronary stenting), a multicenter randomized controlled trial" <sup>6</sup>        | It's a comment.                           |
| Letter by Koh Regarding Article, "Benefit of Adding Ezetimibe to Statin Therapy on Cardiovascular Outcomes and Safety in Patients With Versus Without Diabetes Mellitus: results From IMPROVE-IT (Improved Reduction of Outcomes: vytorin Efficacy International Trial)" <sup>7</sup>                                                                       | It's a comment.                           |
| Letter by Donzelli et al Regarding Article, "Benefit of Adding Ezetimibe to Statin Therapy on Cardiovascular Outcomes and Safety in Patients With Versus Without Diabetes Mellitus: results From IMPROVE-IT (Improved Reduction of Outcomes: vytorin Efficacy International Trial)" <sup>8</sup>                                                            | It's a comment.                           |
| Letter by del pinto et al regarding article, "prevention of stroke with the addition of ezetimibe to statin therapy in patients with acute coronary syndrome in IMPROVE-IT (Improved Reduction of Outcomes: vytorin Efficacy International Trial)" <sup>9</sup>                                                                                             | It's a comment.                           |
| Letter by thomopoulos and michalopoulou regarding article, "prevention of stroke with the addition of ezetimibe to statin therapy in patients with acute coronary syndrome in IMPROVE-IT (Improved reduction of outcomes: vytorin efficacy international trial)" <sup>10</sup>                                                                              | It's a comment.                           |
| Letter by koh regarding article, "prevention of stroke with the addition of ezetimibe to statin therapy in patients with acute coronary syndrome in IMPROVE-IT (Improved Reduction of Outcomes: vytorin Efficacy International Trial)" <sup>11</sup>                                                                                                        | It's a comment.                           |

|                                                                                                                                                                                                                                                                |                                           |
|----------------------------------------------------------------------------------------------------------------------------------------------------------------------------------------------------------------------------------------------------------------|-------------------------------------------|
| Letter by cordero et al regarding article, "prevention of stroke with the addition of ezetimibe to statin therapy in patients with acute coronary syndrome in IMPROVE-IT (Improved reduction of outcomes: vytorin efficacy international trial)" <sup>12</sup> | It's a comment.                           |
| If the IMPROVE-IT Trial Was Positive, as Reported, Why Did the FDA Denied Expanded Approval for Ezetimibe and Simvastatin? An Explanation of the Tipping Point Analysis <sup>13</sup>                                                                          | It's an editorial.                        |
| Effect of simvastatin and ezetimibe on suPAR levels and outcomes <sup>14</sup>                                                                                                                                                                                 | The comparison is not eligible.           |
| Early combination therapy pays off <sup>15</sup>                                                                                                                                                                                                               | It's not written in English.              |
| Application of a novel UPLC-MS/MS method for the pharmacokinetic/bioequivalence determination of atorvastatin and ezetimibe in human plasma <sup>16</sup>                                                                                                      | The comparison is not eligible.           |
| Effects of lipid-lowering treatment on platelet reactivity and platelet-leukocyte aggregation in diabetic patients without and with chronic kidney disease: a randomized trial <sup>17</sup>                                                                   | Follow-up duration is less than 24 weeks. |
| Effects of lipid-lowering treatment on circulating microparticles in patients with diabetes mellitus and chronic kidney disease <sup>18</sup>                                                                                                                  | Follow-up duration is less than 24 weeks. |
| Pleiotropic effects with equivalent low-density lipoprotein cholesterol reduction: comparative study between simvastatin and simvastatin/ezetimibe coadministration <sup>19</sup>                                                                              | Follow-up duration is less than 24 weeks. |
| Impact of pressure recovery on echocardiographic assessment of asymptomatic aortic stenosis: a SEAS substudy <sup>20</sup>                                                                                                                                     | The comparison is not eligible.           |
| Goal-RCT: results from the first randomized trial comparing colesevelam vs. ezetimibe in type 2 diabetes <sup>21</sup>                                                                                                                                         | It's a conference abstract.               |
| Application of one-step liquid chromatography-electrospray tandem MS/MS and collision-induced dissociation to quantification of ezetimibe and identification of its glucuronated metabolite in human serum: a pharmacokinetic study <sup>22</sup>              | The comparison is not eligible.           |
| Efficacy of co-administered ezetimibe plus simvastatin versus atorvastatin alone in adults with hypercholesterolemia <sup>23</sup>                                                                                                                             | It's a conference abstract.               |
| Efficacy and Safety of Bempedoic Acid + Ezetimibe Fixed-Dose Combination in Patients at High CVD Risk and with Elevated LDL-C Receiving Maximally Tolerated Statin Therapy <sup>24</sup>                                                                       | It's a conference abstract.               |
| Effect of ezetimibe coadministered with atorvastatin in 628 patients with primary hypercholesterolemia: a prospective, randomized, double-blind trial <sup>25</sup>                                                                                            | Follow-up duration is less than 24 weeks. |
| Bempedoic acid plus ezetimibe fixed-dose combination in patients with hypercholesterolemia and high CVD risk treated with maximally tolerated statin therapy <sup>26</sup>                                                                                     | Follow-up duration is less than 24 weeks. |
| Efficacy and safety of rosuvastatin 40 mg alone or in combination with ezetimibe in patients at high risk of cardiovascular disease (results from the EXPLORER study) <sup>27</sup>                                                                            | Follow-up duration is less than 24 weeks. |
| Effects of ezetimibe on markers of synthesis and absorption of cholesterol in high-risk patients with elevated C-reactive protein <sup>28</sup>                                                                                                                | Follow-up duration is less than 24 weeks. |

|                                                                                                                                                                                                                                                                                                    |                                           |
|----------------------------------------------------------------------------------------------------------------------------------------------------------------------------------------------------------------------------------------------------------------------------------------------------|-------------------------------------------|
| Ezetimibe + simvastatin versus doubling the dose of simvastatin in high cardiovascular risk diabetics: a multicenter, randomized trial (the LEAD study) <sup>29</sup>                                                                                                                              | Follow-up duration is less than 24 weeks. |
| Are post-treatment low-density lipoprotein subclass pattern analyses potentially misleading? <sup>30</sup>                                                                                                                                                                                         | Follow-up duration is less than 24 weeks. |
| Efficacy and safety of ezetimibe added to atorvastatin versus atorvastatin uptitration or switching to rosuvastatin in patients with primary hypercholesterolemia <sup>31</sup>                                                                                                                    | Follow-up duration is less than 24 weeks. |
| A multicenter, randomized, double-blind, placebo-controlled, factorial design study to evaluate the lipid-altering efficacy and safety profile of the ezetimibe/simvastatin tablet compared with ezetimibe and simvastatin monotherapy in patients with primary hypercholesterolemia <sup>32</sup> | Follow-up duration is less than 24 weeks. |
| Effects of coadministered ezetimibe plus fenofibrate in mixed dyslipidemic patients with metabolic syndrome <sup>33</sup>                                                                                                                                                                          | Follow-up duration is less than 24 weeks. |
| Rosuvastatin for Reduction of Myocardial Damage during Coronary Angioplasty - the Remedy Trial <sup>34</sup>                                                                                                                                                                                       | Follow-up duration is less than 24 weeks. |
| LDL-C goal attainment with the addition of ezetimibe to ongoing simvastatin treatment in coronary heart disease patients with hypercholesterolemia <sup>35</sup>                                                                                                                                   | Follow-up duration is less than 24 weeks. |
| Does ENHANCE diminish confidence in lowering LDL or in ezetimibe? <sup>36</sup>                                                                                                                                                                                                                    | It's a comment.                           |
| Efficacy of ezetimibe/simvastatin 10/40 mg compared to doubling the dose of low-, medium- and high-potency statin monotherapy in patients with a recent coronary event <sup>37</sup>                                                                                                               | Follow-up duration is less than 24 weeks. |
| Ezetimibe plus a statin after acute coronary syndromes <sup>38</sup>                                                                                                                                                                                                                               | It's a comment.                           |
| Efficacy of cholesterol uptake inhibition added to statin therapy among subjects following a low-carbohydrate diet: a randomized controlled trial <sup>39</sup>                                                                                                                                    | Follow-up duration is less than 24 weeks. |
| Design and rationale of the GAUSS-2 study trial: a double-blind, ezetimibe-controlled phase 3 study of the efficacy and tolerability of evolocumab (AMG 145) in subjects with hypercholesterolemia who are intolerant of statin therapy <sup>40</sup>                                              | Follow-up duration is less than 24 weeks. |
| Ezetimibe effectively decreases LDL-cholesterol in HIV-infected patients <sup>41</sup>                                                                                                                                                                                                             | Follow-up duration is less than 24 weeks. |
| Ezetimibe: clinical and scientific meaning of the IMPROVE-IT study <sup>42</sup>                                                                                                                                                                                                                   | It's a comment.                           |
| Ezetimibe plus a statin after acute coronary syndromes <sup>43</sup>                                                                                                                                                                                                                               | It's a comment.                           |
| Efficacy and safety of ezetimibe coadministered with statins: randomised, placebo-controlled, blinded experience in 2382 patients with primary hypercholesterolemia <sup>44</sup>                                                                                                                  | Follow-up duration is less than 24 weeks. |
| Inhibition of intestinal cholesterol absorption with ezetimibe increases components of reverse cholesterol transport in humans <sup>45</sup>                                                                                                                                                       | Follow-up duration is less than 24 weeks. |
| A randomised placebo-controlled double-blind trial to evaluate lipid-lowering pharmacotherapy on proteolysis and inflammation in abdominal aortic aneurysms <sup>46</sup>                                                                                                                          | Follow-up duration is less than 24 weeks. |
| Ezetimibe added to ongoing statin therapy improves LDL-C goal attainment and lipid profile in patients with diabetes or metabolic syndrome <sup>47</sup>                                                                                                                                           | Follow-up duration is less than 24 weeks. |



|                                                                                                                                                                                                                                                                                                                                                                       |                                           |
|-----------------------------------------------------------------------------------------------------------------------------------------------------------------------------------------------------------------------------------------------------------------------------------------------------------------------------------------------------------------------|-------------------------------------------|
| Cholesterol lowering and ezetimibe <sup>48</sup>                                                                                                                                                                                                                                                                                                                      | It's an editorial.                        |
| Open-label therapy with alirocumab in patients with heterozygous familial hypercholesterolemia: results from three years of treatment <sup>49</sup>                                                                                                                                                                                                                   | The comparison is not eligible.           |
| Ezetimibe plus a statin after acute coronary syndromes <sup>50</sup>                                                                                                                                                                                                                                                                                                  | It's a comment.                           |
| Safety and efficacy of ezetimibe monotherapy in 1624 primary hypercholesterolaemic patients for up to 2 years <sup>51</sup>                                                                                                                                                                                                                                           | The comparison is not eligible.           |
| Effect of Combination Therapy of Ezetimibe and Atorvastatin on Remnant Lipoprotein Versus Double Atorvastatin Dose in Egyptian Diabetic Patients <sup>52</sup>                                                                                                                                                                                                        | Follow-up duration is less than 24 weeks. |
| Treatment of high-risk patients with ezetimibe plus simvastatin co-administration versus simvastatin alone to attain National Cholesterol Education Program Adult Treatment Panel III low-density lipoprotein cholesterol goals <sup>53</sup>                                                                                                                         | Follow-up duration is less than 24 weeks. |
| Effects of four antiplatelet/statin combined strategies on immune and inflammatory responses in patients with acute myocardial infarction undergoing pharmacoinvasive strategy: design and rationale of the B and T Types of Lymphocytes Evaluation in Acute Myocardial Infarction (BATTLE-AMI) study: study protocol for a randomized controlled trial <sup>54</sup> | The comparison is not eligible.           |
| Efficacy and safety of ezetimibe added to ongoing statin therapy for treatment of patients with primary hypercholesterolemia <sup>55</sup>                                                                                                                                                                                                                            | Follow-up duration is less than 24 weeks. |
| Efficacy and safety of ezetimibe co-administered with ongoing atorvastatin therapy in achieving low-density lipoprotein goal in patients with hypercholesterolemia and coronary heart disease <sup>56</sup>                                                                                                                                                           | Follow-up duration is less than 24 weeks. |
| A randomized placebo-controlled double-blind trial to evaluate ezetimibe combination therapy on abdominal aortic aneurysm wall proteolysis and inflammation <sup>57</sup>                                                                                                                                                                                             | It's a conference abstract.               |
| Endothelial Effect of Statin Therapy at a High Dose Versus Low Dose Associated with Ezetimibe <sup>58</sup>                                                                                                                                                                                                                                                           | Follow-up duration is less than 24 weeks. |
| Statin Therapy with Ezetimibe or Niacin in High-Risk Patients <sup>59</sup>                                                                                                                                                                                                                                                                                           | It's an editorial.                        |
| Vascular and metabolic effects of ezetimibe combined with simvastatin in patients with hypercholesterolemia <sup>60</sup>                                                                                                                                                                                                                                             | Follow-up duration is less than 24 weeks. |
| Pathologic Intimal Thickening Plaque Phenotype: not as Innocent as Previously Thought. A Serial 3D Intravascular Ultrasound Virtual Histology Study <sup>61</sup>                                                                                                                                                                                                     | It's not a RCT.                           |
| Treatment of alopecia areata with simvastatin/ezetimibe <sup>62</sup>                                                                                                                                                                                                                                                                                                 | It's not a RCT.                           |
| Effect of Switching From Statin Monotherapy to Ezetimibe/Simvastatin Combination Therapy Compared With Other Intensified Lipid-Lowering Strategies on Lipoprotein Subclasses in Diabetic Patients With Symptomatic Cardiovascular Disease <sup>63</sup>                                                                                                               | Follow-up duration is less than 24 weeks. |
| The effects of low-dose simvastatin and ezetimibe compared to high-dose simvastatin alone on post-fat load endothelial function in patients with metabolic syndrome: a randomized double-blind crossover trial <sup>64</sup>                                                                                                                                          | Follow-up duration is less than 24 weeks. |

|                                                                                                                                                                                                                                         |                                           |
|-----------------------------------------------------------------------------------------------------------------------------------------------------------------------------------------------------------------------------------------|-------------------------------------------|
| Pharmacokinetic and pharmacodynamic interactions between the immunosuppressant sirolimus and the lipid-lowering drug ezetimibe in healthy volunteers <sup>65</sup>                                                                      | Follow-up duration is less than 24 weeks. |
| Drug interactions between the immunosuppressant tacrolimus and the cholesterol absorption inhibitor ezetimibe in healthy volunteers <sup>66</sup>                                                                                       | Follow-up duration is less than 24 weeks. |
| Pharmacokinetic bioequivalence crossover study of branded generic and innovator formulations of the cholesterol lowering agent ezetimibe <sup>67</sup>                                                                                  | The comparison is not eligible.           |
| Ezetimibe plus a statin after acute coronary syndromes <sup>68</sup>                                                                                                                                                                    | It's a comment.                           |
| A community-based, randomized trial of ezetimibe added to statin therapy to attain NCEP ATP III goals for LDL cholesterol in hypercholesterolemic patients: the ezetimibe add-on to statin for effectiveness (EASE) trial <sup>69</sup> | Follow-up duration is less than 24 weeks. |
| Attainment of LDL-cholesterol treatment goals in patients with familial hypercholesterolemia: 5-year SAFEHEART registry follow-up <sup>70</sup>                                                                                         | It's a cohort study.                      |
| Long-term treatment with evolocumab added to conventional drug therapy, with or without apheresis, in patients with homozygous familial hypercholesterolaemia: an interim subset analysis of the open-label TAUSSIG study <sup>71</sup> | It's a non-randomised trial.              |
| Relationship Between Low-Density Lipoprotein Cholesterol, Free Proprotein Convertase Subtilisin/Kexin Type 9, and Alirocumab Levels After Different Lipid-Lowering Strategies <sup>72</sup>                                             | Follow-up duration is less than 24 weeks. |
| Ezetimibe plus a statin after acute coronary syndromes <sup>73</sup>                                                                                                                                                                    | It's a comment.                           |
| The efficacy of statin monotherapy uptitration versus switching to ezetimibe/simvastatin: results of the EASEGO study <sup>74</sup>                                                                                                     | Follow-up duration is less than 24 weeks. |
| A comparison of efficacy and safety of an ezetimibe/simvastatin combination compared with other intensified lipid-lowering treatment strategies in diabetic patients with symptomatic cardiovascular disease <sup>75</sup>              | Follow-up duration is less than 24 weeks. |
| Effects of combined ezetimibe and simvastatin therapy as compared with simvastatin alone in patients with type 2 diabetes: a prospective randomized double-blind clinical trial <sup>76</sup>                                           | Follow-up duration is less than 24 weeks. |
| Effects of combined ezetimibe and simvastatin therapy as compared with simvastatin alone in patients with type 2 diabetes: a prospective randomized double-blind clinical trial <sup>77</sup>                                           | It's a comment.                           |
| Ezetimibe plus a statin after acute coronary syndromes <sup>78</sup>                                                                                                                                                                    | It's a comment.                           |
| Development of a joint population pharmacokinetic model of ezetimibe and its conjugated metabolite <sup>79</sup>                                                                                                                        | Follow-up duration is less than 24 weeks. |
| Tolerability and effects on lipids of ezetimibe coadministered with pravastatin or simvastatin for twelve months: results from two open-label extension studies in hypercholesterolemic patients <sup>80</sup>                          | The comparison is not eligible.           |
| Treatment with ETC-1002 alone and in combination with ezetimibe lowers LDL cholesterol in hypercholesterolemic patients with or without statin intolerance <sup>81</sup>                                                                | Follow-up duration is less than 24 weeks. |

|                                                                                                                                                                                                                           |                                           |
|---------------------------------------------------------------------------------------------------------------------------------------------------------------------------------------------------------------------------|-------------------------------------------|
| Ezetimibe provides incremental reduction in risk for cardiovascular events and need for revascularisation following an acute coronary syndrome <sup>82</sup>                                                              | It's a comment.                           |
| Priority Paper Evaluation: are antibodies against PCSK9 the statins of the 21st century? <sup>83</sup>                                                                                                                    | It's a comment.                           |
| Ezetimibe/simvastatin or atorvastatin for the treatment of hypercholesterolemia in patients with the metabolic syndrome: the VYMET study <sup>84</sup>                                                                    | It's a comment.                           |
| Letter by Weingärtner et al regarding article, "combined effects of ezetimibe and phytosterols on cholesterol metabolism: a randomized, controlled feeding study in humans" <sup>85</sup>                                 | It's a comment.                           |
| Endothelial progenitor cell levels in obese men with the metabolic syndrome and the effect of simvastatin monotherapy vs. simvastatin/ezetimibe combination therapy <sup>86</sup>                                         | Follow-up duration is less than 24 weeks. |
| Ezetimibe alone reduces low-density lipoprotein cholesterol in HIV-infected patients receiving combination antiretroviral therapy <sup>87</sup>                                                                           | Follow-up duration is less than 24 weeks. |
| Comparison of statin plus ezetimibe with double-dose statin on lipid profiles and inflammation markers <sup>88</sup>                                                                                                      | Follow-up duration is less than 24 weeks. |
| Lack of pharmacokinetic interaction of mipomersen sodium (ISIS 301012), a 2'-O-methoxyethyl modified antisense oligonucleotide targeting apolipoprotein B-100 messenger RNA, with simvastatin and ezetimibe <sup>89</sup> | Follow-up duration is less than 24 weeks. |
| Colesevelam HCl and ezetimibe combination therapy provides effective lipid-lowering in difficult-to-treat patients with hypercholesterolemia <sup>90</sup>                                                                | Follow-up duration is less than 24 weeks. |
| Lack of pharmacokinetic interaction of mipomersen sodium (ISIS 301012), a 2'-O-methoxyethyl modified antisense oligonucleotide targeting apolipoprotein B-100 messenger RNA, with simvastatin and ezetimibe <sup>91</sup> | Follow-up duration is less than 24 weeks. |
| Pharmacokinetics and exploratory efficacy biomarkers of bococizumab, an anti-PCSK9 monoclonal antibody, in hypercholesterolemic Japanese subjects <sup>92</sup>                                                           | Follow-up duration is less than 24 weeks. |
| Fenofibric acid: In combination therapy in the treatment of mixed dyslipidemia <sup>93</sup>                                                                                                                              | It's not a RCT.                           |
| Comparison of statin plus ezetimibe with double-dose statin on lipid profiles and inflammation markers 11 Medical and Health Sciences 1103 Clinical Sciences <sup>94</sup>                                                | Follow-up duration is less than 24 weeks. |
| Letter by Weingartner et al Regarding Article, "ezetimibe Lipid-Lowering Trial on Prevention of Atherosclerotic Cardiovascular Disease in 75 or Older (EWTOPIA 75): A Randomized, Controlled Trial" <sup>95</sup>         | It's a comment.                           |
| Closing the remaining evidence gap randomized controlled trial data to support statin therapy for low-Density lipoprotein $\geq 190$ mg/dL <sup>96</sup>                                                                  | It's a comment.                           |
| The potential of mipomersen, an ApoB synthesis inhibitor, to reduce necessity for LDL-apheresis in patients with heterozygous familial hypercholesterolemia and coronary artery disease <sup>97</sup>                     | The comparison is not eligible.           |

|                                                                                                                                                                                                                                           |                                           |
|-------------------------------------------------------------------------------------------------------------------------------------------------------------------------------------------------------------------------------------------|-------------------------------------------|
| Variation in Lipid-Lowering Therapy Use in Patients With Low-Density Lipoprotein Cholesterol $\geq$ 190 mg/dL: Insights From the National Cardiovascular Data Registry-Practice Innovation and Clinical Excellence Registry <sup>98</sup> | It's a cohort study.                      |
| Relationship between "LDL-C" estimated true LDL-C, apolipoprotein B-100, and PCSK9 levels following lipoprotein(a) lowering with an antisense oligonucleotide <sup>99</sup>                                                               | The comparison is not eligible.           |
| One year perspective on COURAGE <sup>100</sup>                                                                                                                                                                                            | It's a comment.                           |
| Regions with higher medicare Part D spending show better drug adherence, but not lower medicare costs for two diseases <sup>101</sup>                                                                                                     | It's not a RCT.                           |
| Efficacy of ezetimibe is associated with gender and baseline lipid levels in patients with type 2 diabetes <sup>102</sup>                                                                                                                 | It's a single-arm study.                  |
| Low-density lipoprotein lowering therapy: An analysis of the options <sup>103</sup>                                                                                                                                                       | It's a comment.                           |
| Intensive lipid lowering with simvastatin and ezetimibe in aortic stenosis <sup>104</sup>                                                                                                                                                 | The comparison is not eligible.           |
| Acute Effects of Statin Therapy on Coronary Atherosclerosis Following an Acute Coronary Syndrome <sup>105</sup>                                                                                                                           | The comparison is not eligible.           |
| Effect of 1 or 2 Doses of Inclisiran on Low-Density Lipoprotein Cholesterol Levels: One-Year Follow-up of the ORION-1 Randomized Clinical Trial <sup>106</sup>                                                                            | The comparison is not eligible.           |
| Balancing randomized trials with anecdote <sup>107</sup>                                                                                                                                                                                  | It's an editorial.                        |
| Pleiotropic effects of ezetimibe/simvastatin vs. high dose simvastatin <sup>108</sup>                                                                                                                                                     | Follow-up duration is less than 24 weeks. |
| Changes in muscle strength in individuals with statin-induced myopathy: A summary of 3 investigations <sup>109</sup>                                                                                                                      | The comparison is not eligible.           |
| The effects of low-dose simvastatin and ezetimibe compared to high-dose simvastatin alone on post-fat load endothelial function in patients with metabolic syndrome: A randomized double-blind crossover trial <sup>110</sup>             | Follow-up duration is less than 24 weeks. |
| The gravity of JUPITER (justification for the use of statins in primary prevention: An Intervention Trial Evaluating Rosuvastatin) <sup>111</sup>                                                                                         | The comparison is not eligible.           |
| Statins and familial hypercholesterolaemia <sup>112</sup>                                                                                                                                                                                 | It's an editorial.                        |
| Endoplasmic reticulum stress effector CCAAT/enhancer-binding protein homologous protein (CHOP) regulates chronic kidney disease-induced vascular calcification <sup>113</sup>                                                             | The comparison is not eligible.           |
| Rescued by randomization (Clinical and Mendelian) <sup>114</sup>                                                                                                                                                                          | It's a comment.                           |
| LDL-C goal attainment with ezetimibe plus simvastatin coadministration vs atorvastatin or simvastatin monotherapy in patients at high risk of CHD <sup>115</sup>                                                                          | Follow-up duration is less than 24 weeks. |
| Impact of an Initial Strategy of Medical Therapy Without Percutaneous Coronary Intervention in High-Risk Patients From the Clinical Outcomes Utilizing Revascularization and Aggressive Drug Evaluation (COURAGE) Trial <sup>116</sup>    | The comparison is not eligible.           |

|                                                                                                                                                                                                                                                                                                  |                                           |
|--------------------------------------------------------------------------------------------------------------------------------------------------------------------------------------------------------------------------------------------------------------------------------------------------|-------------------------------------------|
| Longitudinal assessment of carotid plaque texture in three-dimensional ultrasound images based on semi-supervised graph-based dimensionality reduction and feature selection <sup>117</sup>                                                                                                      | The comparison is not eligible.           |
| Effect of switching from statin monotherapy to ezetimibe/simvastatin combination therapy compared with other intensified lipid-lowering strategies on lipoprotein subclasses in diabetic patients with symptomatic cardiovascular disease <sup>118</sup>                                         | Follow-up duration is less than 24 weeks. |
| Pharmacodynamic interaction between the new selective cholesterol absorption inhibitor ezetimibe and simvastatin <sup>119</sup>                                                                                                                                                                  | Follow-up duration is less than 24 weeks. |
| Effects of atorvastatin on renal function in patients with dyslipidemia and chronic kidney disease: assessment of clinical usefulness in CKD patients with atorvastatin (ASUCA) trial <sup>120</sup>                                                                                             | The comparison is not eligible.           |
| Effect of fixed-dose combinations of ezetimibe plus rosuvastatin in patients with primary hypercholesterolemia: MRS-ROZE (Multicenter Randomized Study of ROSuvastatin and eZETimibe) <sup>121</sup>                                                                                             | Follow-up duration is less than 24 weeks. |
| Inhibition of cholesterol absorption by the combination of dietary plant sterols and ezetimibe: Effects on plasma lipid levels <sup>122</sup>                                                                                                                                                    | Follow-up duration is less than 24 weeks. |
| Crossing family histories of diabetes and cardiovascular disease leads to unexpected outcomes in diabetic offspring <sup>123</sup>                                                                                                                                                               | It's a cross-sectional study.             |
| Serum cholesterol and statin use predict virological response to peginterferon and ribavirin therapy <sup>124</sup>                                                                                                                                                                              | The comparison is not eligible.           |
| After ENHANCE: The cholesterol hypothesis is alive and well <sup>125</sup>                                                                                                                                                                                                                       | It's an editorial.                        |
| Evolution of the Lipid Trial Protocol of the Action to Control Cardiovascular Risk in Diabetes (ACCORD) Trial <sup>126</sup>                                                                                                                                                                     | The comparison is not eligible.           |
| Safety of the combination of intensive cholesterol-lowering therapy with oral anticoagulation medication in elderly patients with atrial fibrillation: A randomized, double-blind, placebo-controlled study <sup>127</sup>                                                                       | The comparison is not eligible.           |
| Individualized low-density lipoprotein cholesterol reduction with alirocumab titration strategy in heterozygous familial hypercholesterolemia: Results from an open-label extension of the ODYSSEY LONG TERM trial <sup>128</sup>                                                                | It's a single-arm study.                  |
| Utilization patterns of extended-release niacin in Canada: Analysis of an administrative claims database <sup>129</sup>                                                                                                                                                                          | It's not a RCT.                           |
| Projected coronary heart disease risk benefit with ezetimibe <sup>130</sup>                                                                                                                                                                                                                      | Follow-up duration is less than 24 weeks. |
| Expanding the understanding of the treatment of chronic angina: A 21st century approach - Part II <sup>131</sup>                                                                                                                                                                                 | It's an editorial.                        |
| Efficacy and safety of coadministration of fenofibrate and ezetimibe compared with each as monotherapy in patients with type IIb dyslipidemia and features of the metabolic syndrome: A prospective, randomized, double-blind, three-parallel arm, multicenter, comparative study <sup>132</sup> | Follow-up duration is less than 24 weeks. |

|                                                                                                                                                                                                                                                                 |                                           |
|-----------------------------------------------------------------------------------------------------------------------------------------------------------------------------------------------------------------------------------------------------------------|-------------------------------------------|
| Effects of lipid-lowering treatment on platelet reactivity and plateletleukocyte aggregation in diabetic patients without and with chronic kidney disease: A randomized trial <sup>133</sup>                                                                    | Follow-up duration is less than 24 weeks. |
| Effect of ezetimibe-simvastatine over endothelial dysfunction in dyslipidemic patients: Assessment by <sup>13</sup> N-ammonia positron emission tomography <sup>134</sup>                                                                                       | It's a case control study.                |
| Is combined lipid-regulating therapy safe and feasible for the very old patients with mixed dyslipidemia? <sup>135</sup>                                                                                                                                        | It's not a randomised controlled trial.   |
| Intensive lipid-lowering therapy: obvious benefits, possible risks <sup>136</sup>                                                                                                                                                                               | It's a case report.                       |
| Induction of microsomal triglyceride transfer protein expression is a candidate mechanism by which ezetimibe therapy might exert beneficial effects in patients with nonalcoholic steatohepatitis <sup>137</sup>                                                | It's a comment.                           |
| Heterozygous Ldlr-Deficient Hamster as a Model to Evaluate the Efficacy of PCSK9 Antibody in Hyperlipidemia and Atherosclerosis <sup>138</sup>                                                                                                                  | Follow-up duration is less than 24 weeks. |
| Rapid Regression of Multiple-Site Xanthomas in an Adult With Homozygous Familial Hypercholesterolemia by Triple Lipid-Lowering Drugs <sup>139</sup>                                                                                                             | It's a case report.                       |
| Effect on Fasting Serum Glucose Levels of Adding Ezetimibe to Statins in Patients With Nondiabetic Hypercholesterolemia <sup>140</sup>                                                                                                                          | It's a pooled analysis.                   |
| Cardiovascular Screening and Management Among Kidney Transplant Candidates in Hungary <sup>141</sup>                                                                                                                                                            | It's not a RCT.                           |
| The antilipidemic effects of ezetimibe in patients with diabetes <sup>142</sup>                                                                                                                                                                                 | Follow-up duration is less than 24 weeks. |
| Treatment of symptomatic HyperLp(a)lipoproteinemia with LDL-apheresis: a multicentre study <sup>143</sup>                                                                                                                                                       | It's not a RCT.                           |
| Use of ezetimibe during HIV infection <sup>144</sup>                                                                                                                                                                                                            | Follow-up duration is less than 24 weeks. |
| Asymptomatic carotid stenosis <sup>145</sup>                                                                                                                                                                                                                    | It's a case report.                       |
| Letter to the Editor: The ezetimibe 'controversy' is a misunderstanding <sup>146</sup>                                                                                                                                                                          | It's a comment.                           |
| Is carotid intima-media thickness a reliable clinical predictor? <sup>147</sup>                                                                                                                                                                                 | It's a review.                            |
| Hepatitis C RNA clearance after treatment with ezetimibe <sup>148</sup>                                                                                                                                                                                         | It's a case report.                       |
| New lipid-lowering combo proves successful <sup>149</sup>                                                                                                                                                                                                       | It's a comment.                           |
| Making sense of ENHANCE: ezetimibe (Zetia) lowers LDL cholesterol but doesn't decrease carotid intima-media thickness <sup>150</sup>                                                                                                                            | It's a comment.                           |
| Inhibition of PCSK9 in familial hypercholesterolaemia <sup>151</sup>                                                                                                                                                                                            | It's a comment.                           |
| Letter by Settergren et al regarding article, "Evidence for statin pleiotropy in humans: differential effects of statins and ezetimibe on rho-associated coiled-coil containing protein kinase activity, endothelial function, and inflammation" <sup>152</sup> | It's a comment.                           |
| Differential effect of hypolipidemic drugs on lipoprotein-associated phospholipase A2 <sup>153</sup>                                                                                                                                                            | It's not a RCT.                           |
| Two more drugs for dyslipidemia <sup>154</sup>                                                                                                                                                                                                                  | It's an editorial.                        |

|                                                                                                                                                                                                |                                           |
|------------------------------------------------------------------------------------------------------------------------------------------------------------------------------------------------|-------------------------------------------|
| Colesevelam hydrochloride-ezetimibe combination lipid-lowering therapy in patients with diabetes or metabolic syndrome and a history of statin intolerance <sup>155</sup>                      | It's not a RCT.                           |
| Effects of Statins on the Development of Cataract-the Long Standing Debate <sup>156</sup>                                                                                                      | It's a comment.                           |
| Effect of ezetimibe coadministered with statins in genotype-confirmed heterozygous FH patients <sup>157</sup>                                                                                  | It's not a RCT.                           |
| Reduction of ischemic events in Improved Reduction of Outcomes: Vytorin Efficacy International Trial: Intensive cholesterol lowering or ezetimibe antithrombotic effects? <sup>158</sup>       | It's an editorial.                        |
| Biomarkers and surrogate endpoints in cardiovascular therapeutics research: under scrutiny following results of the ENHANCE Study <sup>159</sup>                                               | It's a comment.                           |
| Atorvastatin in combination with ezetimibe and carotid atherosclerosis <sup>160</sup>                                                                                                          | It's a comment.                           |
| Clinical usefulness of additional treatment with ezetimibe in patients with coronary artery disease on statin therapy. - From the viewpoint of cholesterol metabolism <sup>161</sup>           | Follow-up duration is less than 24 weeks. |
| Ezetimibe in heart transplantation: initial experience <sup>162</sup>                                                                                                                          | It's a single-arm study.                  |
| Effect of ezetimibe in HCV viral load after liver transplantation <sup>163</sup>                                                                                                               | It's a single-arm study.                  |
| SPG5 siblings with different phenotypes showing reduction of 27-hydroxycholesterol after simvastatin-ezetimibe treatment <sup>164</sup>                                                        | It's a case series.                       |
| Evaluating Statin Versus Statin Plus Ezetimibe for Coronary Plaque Regression <sup>165</sup>                                                                                                   | It's a comment.                           |
| IMPROVE-IT clinical implications. Should the "high-intensity cholesterol-lowering therapy" strategy replace the "high-intensity statin therapy" <sup>166</sup>                                 | It's a comment.                           |
| Treatment with ezetimibe in kidney transplant recipients with uncontrolled dyslipidemia <sup>167</sup>                                                                                         | It's a single-arm study.                  |
| Alopecia areata (AA) and treatment with simvastatin/ezetimibe: Experience of 20 patients <sup>168</sup>                                                                                        | It's a single-arm study.                  |
| Combination therapy analysis of ezetimibe and statins in Chinese patients with acute coronary syndrome and type 2 diabetes <sup>169</sup>                                                      | It's not a RCT.                           |
| The Effect of Ezetimibe/Statin Combination and High-Dose Statin Therapy on Thyroid Autoimmunity in Women with Hashimoto's Thyroiditis and Cardiovascular Disease: A Pilot Study <sup>170</sup> | It's not a RCT.                           |
| Ezetimibe - a new approach in hypercholesterolemia management <sup>171</sup>                                                                                                                   | It's a comment.                           |
| Anti-PCSK9 monotherapy for hypercholesterolemia: the MENDEL-2 randomized, controlled phase III clinical trial of evolocumab <sup>172</sup>                                                     | Follow-up duration is less than 24 weeks. |
| Intriguing Off-Target Effects of Ezetimibe <sup>173</sup>                                                                                                                                      | It's a comment.                           |
| Access to Nonstatin Lipid-Lowering Therapies in Patients at High Risk of Atherosclerotic Cardiovascular Disease <sup>174</sup>                                                                 | It's not a RCT.                           |
| Low-density lipoprotein cholesterol lowering therapy and established atherosclerosis <sup>175</sup>                                                                                            | It's an editorial.                        |
| Efficacy and safety of long-term ezetimibe/simvastatin treatment in patients with familial hypercholesterolemia <sup>176</sup>                                                                 | It's a single-arm study.                  |
| Getting there: statin plus ezetimibe for low-density lipoprotein cholesterol goals <sup>177</sup>                                                                                              | It's a comment.                           |
| Flutamide-induced photoleukoderma <sup>178</sup>                                                                                                                                               | It's a case report.                       |

|                                                                                                                                                                                                                                                |                                           |
|------------------------------------------------------------------------------------------------------------------------------------------------------------------------------------------------------------------------------------------------|-------------------------------------------|
| Evolocumab for the treatment of heterozygous familial hypercholesterolemia in end-stage chronic kidney disease and dialysis <sup>179</sup>                                                                                                     | It's a case report.                       |
| Dose-comparison study of the combination of ezetimibe and simvastatin (Vytorin) versus atorvastatin in patients with hypercholesterolemia: the Vytorin Versus Atorvastatin (VYVA) Study <sup>180</sup>                                         | Follow-up duration is less than 24 weeks. |
| Ezetimibe, oxidized low density lipoprotein, Lp (a), and dyslipidemia <sup>181</sup>                                                                                                                                                           | It's a comment.                           |
| High-intensity statin monotherapy versus moderate-intensity statin plus ezetimibe therapy: effects on vascular biomarkers <sup>182</sup>                                                                                                       | Follow-up duration is less than 24 weeks. |
| Treatment of high-risk patients with ezetimibe plus simvastatin co-administration versus simvastatin alone to attain National Cholesterol Education Program Adult Treatment Panel III low-density lipoprotein cholesterol goals <sup>183</sup> | Follow-up duration is less than 24 weeks. |
| Ptosis, diplopia and statins: an association? <sup>184</sup>                                                                                                                                                                                   | It's a case report.                       |
| Ezetimibe-induced hyperlipidaemia <sup>185</sup>                                                                                                                                                                                               | It's a case report.                       |
| Clinical role of a fixed combination of standardized Berberis aristata and Silybum marianum extracts in diabetic and hypercholesterolemic patients intolerant to statins <sup>186</sup>                                                        | It's not a RCT.                           |
| Efficacy and safety of ezetimibe/simvastatin association on non-diabetic and diabetic patients with polygenic hypercholesterolemia or combined hyperlipidemia and previously intolerant to standard statin treatment <sup>187</sup>            | It's not a RCT.                           |
| Available oral lipid-lowering agents could bring most high-risk patients to target: an estimate based on the Dyslipidemia International Study II-Italy <sup>188</sup>                                                                          | It's an observational study.              |
| Modulation of adhesion molecules by cholesterol-lowering therapy in mononuclear cells from hypercholesterolemic patients <sup>189</sup>                                                                                                        | It's not a RCT.                           |
| Atherosclerosis: cell biology and lipoproteins: cholesterol absorption inhibitors: gateway therapy for hypercholesterolaemia <sup>190</sup>                                                                                                    | It's an editorial.                        |
| Consistency in efficacy and safety of ezetimibe coadministered with statins for treatment of hypercholesterolemia in women and men <sup>191</sup>                                                                                              | Follow-up duration is less than 24 weeks. |
| Comparison of Renal Effects of Ezetimibe-Statin Combination versus Statin Monotherapy: A Propensity-Score-Matched Analysis <sup>192</sup>                                                                                                      | It's a cohort study.                      |
| Safety and efficacy of combined ezetimibe/simvastatin treatment and simvastatin monotherapy in patients with non-alcoholic fatty liver disease <sup>193</sup>                                                                                  | It's not a RCT.                           |
| The effects of ezetimibe on the LDL-cholesterol particle number <sup>194</sup>                                                                                                                                                                 | It's a case series.                       |
| Benefit of Targeting a LDL (Low-Density Lipoprotein) Cholesterol <70 mg/dL During 5 Years After Ischemic Stroke <sup>195</sup>                                                                                                                 | The comparison is not eligible.           |
| Efficacy and Safety of Long-term Coadministration of Fenofibrate and Ezetimibe in Patients with Combined Hyperlipidemia: Results of the EFECTL Study <sup>196</sup>                                                                            | There is no safety outcome of interest.   |



|                                                                                                                                                                                                                                                 |                                                                                     |
|-------------------------------------------------------------------------------------------------------------------------------------------------------------------------------------------------------------------------------------------------|-------------------------------------------------------------------------------------|
| Influence of ezetimibe in addition to high-dose atorvastatin therapy on plaque composition in patients with ST-segment elevation myocardial infarction assessed by serial: intravascular ultrasound with iMap: the OCTIVUS trial <sup>197</sup> | There is no safety outcome of interest.                                             |
| Effects of Ezetimibe-Statin Combination Therapy on Coronary Atherosclerosis in Acute Coronary Syndrome <sup>198</sup>                                                                                                                           | There is no safety outcome of interest.                                             |
| Comparative efficacy and adverse effects of the addition of ezetimibe to statin versus statin titration in chronic kidney disease patients <sup>199</sup>                                                                                       | There is no safety outcome of interest.                                             |
| Oxidative stress improvement is associated with increased levels of taurine in CKD patients undergoing lipid-lowering therapy <sup>200</sup>                                                                                                    | There is no safety outcome of interest.                                             |
| Add-on ezetimibe treatment to low-dose statins vs medium-intensity statin monotherapy in coronary artery disease patients with poorly controlled dyslipidemia <sup>201</sup>                                                                    | Follow-up duration is less than 24 weeks.                                           |
| Short-term ezetimibe is well tolerated and effective in combination with statin therapy to treat elevated LDL cholesterol in HIV-infected patients <sup>202</sup>                                                                               | Follow-up duration is less than 24 weeks.                                           |
| Ezetimibe increases intestinal expression of the LDL receptor gene in dyslipidaemic men with insulin resistance <sup>203</sup>                                                                                                                  | Follow-up duration is less than 24 weeks.                                           |
| Effects of atorvastatin and ezetimibe on endothelial function in dyslipidemic patients with chronic kidney disease <sup>204</sup>                                                                                                               | Follow-up duration is less than 24 weeks.                                           |
| A multi-center, open label, crossover designed prospective study evaluating the effects of lipid lowering treatment on steroid synthesis in patients with Type 2 diabetes (MODEST Study) <sup>205</sup>                                         | Follow-up duration is less than 24 weeks.                                           |
| Effects of non-statin antilipemic drugs on vascular endothelial function in patients with type 2 diabetes with hypercholesterolemia <sup>206</sup>                                                                                              | Follow-up duration is less than 24 weeks.                                           |
| Indices of Cholesterol Metabolism and Relative Responsiveness to Ezetimibe and Simvastatin <sup>207</sup>                                                                                                                                       | Follow-up duration is less than 24 weeks.                                           |
| Coadministration of ezetimibe with pegylated interferon plus ribavirin could improve early virological response in chronic hepatitis C obese Egyptian patients <sup>208</sup>                                                                   | There is no safety outcome of interest.                                             |
| Influence of ezetimibe on plaque morphology in patients with ST Elevation Myocardial Infarction assessed by Optical Coherence Tomography: An OCTIVUS sub-study <sup>209</sup>                                                                   | Sub-study report of an included study, and no more interested outcome was reported. |
| Efficacy of Combination Therapy of Rosuvastatin and Ezetimibe vs Rosuvastatin Monotherapy on Lipid Profile of Patients with Coronary Artery Disease <sup>210</sup>                                                                              | There is no safety outcome of interest.                                             |
| Virtual histology evaluation of atherosclerosis regression during atorvastatin and ezetimibe administration: HEAVEN study <sup>211</sup>                                                                                                        | The comparison is not eligible.                                                     |
| Plant sterol supplementation on top of lipid-lowering therapies in familial hypercholesterolemia <sup>212</sup>                                                                                                                                 | There is no safety outcome of interest.                                             |

|                                                                                                                                                                                                        |                                                                    |
|--------------------------------------------------------------------------------------------------------------------------------------------------------------------------------------------------------|--------------------------------------------------------------------|
| Usefulness of Low-Dose Statin Plus Ezetimibe and/or Nutraceuticals in Patients With Coronary Artery Disease Intolerant to High-Dose Statin Treatment <sup>213</sup>                                    | The comparison is not eligible.                                    |
| Usefulness of Nutraceuticals (Armolid Plus) Versus Ezetimibe and Combination in Statin-Intolerant Patients With Dyslipidemia With Coronary Heart Disease <sup>214</sup>                                | The comparison is not eligible.                                    |
| Efficacy and safety of ezetimibe 40 mg vs. ezetimibe 10 mg in the treatment of patients with homozygous sitosterolaemia <sup>215</sup>                                                                 | There is no safety outcome of interest.                            |
| Co-administration of ezetimibe enhances proteinuria-lowering effects of pitavastatin in chronic kidney disease patients partly via a cholesterol-independent manner <sup>216</sup>                     | There is no safety outcome of interest.                            |
| A comparison of the efficacy of combined ezetimibe and statin therapy with doubling of statin dose in patients with remnant lipoproteinemia on previous statin therapy <sup>217</sup>                  | There is no safety outcome of interest.                            |
| A multi-centre, randomised, double-blind 14-week extension study examining the long-term safety and efficacy profile of the ezetimibe/simvastatin combination tablet <sup>218</sup>                    | The comparison is not eligible.                                    |
| Ezetimibe Lipid-Lowering Trial on Prevention of Atherosclerotic Cardiovascular Disease in 75 or Older (EWTOPIA 75): a Randomized, Controlled Trial <sup>219</sup>                                      | There is no safety outcome of interest.                            |
| Effect of intensive lipid-lowering therapies on cholinesterase activity in patients with coronary artery disease <sup>220</sup>                                                                        | There is no safety outcome of interest.                            |
| Intensive statin therapy, used alone or in combination with ezetimibe, improves homocysteine level and lipid peroxidation to a similar degree in patients with coronary artery diseases <sup>221</sup> | There is no safety outcome of interest.                            |
| A pilot study of ezetimibe vs. atorvastatin for improving peripheral microvascular endothelial function in stable patients with type 2 diabetes mellitus <sup>222</sup>                                | There is no safety outcome of interest.                            |
| Effects of ezetimibe on visceral fat in the metabolic syndrome: a randomised controlled study <sup>223</sup>                                                                                           | There is no safety outcome of interest.                            |
| Effectiveness and safety of combinational therapy compared with intensified statin monotherapy in patients with coronary heart disease <sup>224</sup>                                                  | There is no safety outcome of interest.                            |
| Changes in cholesterol absorption and cholesterol synthesis caused by ezetimibe and/or simvastatin in men <sup>225</sup>                                                                               | Follow-up duration is less than 24 weeks.                          |
| Effects of ezetimibe and simvastatin on apolipoprotein B metabolism in males with mixed hyperlipidemia <sup>226</sup>                                                                                  | Follow-up duration is less than 24 weeks.                          |
| Atorvastatin 10 mg plus ezetimibe 10 mg compared with atorvastatin 20 mg: Impact on the lipid profile in Japanese patients with abnormal glucose tolerance and coronary artery disease <sup>227</sup>  | Follow-up duration is less than 24 weeks.                          |
| Long-term (48-week) safety of ezetimibe 10 mg/day coadministered with simvastatin compared to simvastatin alone in patients with primary hypercholesterolemia <sup>228</sup>                           | This two-phase study didn't report outcomes in each group clearly. |

**Table S6 Rational of excluding studies during the full-text screening of observational studies**

| Title | Reason for exclusion |
|-------|----------------------|
|-------|----------------------|

|                                                                                                                                                                                                                                |                                      |
|--------------------------------------------------------------------------------------------------------------------------------------------------------------------------------------------------------------------------------|--------------------------------------|
| Statins in primary biliary cirrhosis: are they safe? <sup>229</sup>                                                                                                                                                            | The comparison is ineligible.        |
| LDL-cholesterol target attainment according to the 2011 and 2016 ESC/EAS dyslipidaemia guidelines in patients with a recent myocardial infarction - nationwide cohort study, 2013-2017. <sup>230</sup>                         | No outcome of interest was reported. |
| Epidemiological characteristics, management and early outcomes of acute coronary syndromes in Greece: The PHAETHON study. <sup>231</sup>                                                                                       | The comparison is ineligible.        |
| Short-term outcome and attainment of secondary prevention goals in patients with acute coronary syndrome-Results from the countrywide TARGET study. <sup>232</sup>                                                             | The comparison is ineligible.        |
| Application of the 2019 ESC/EAS dyslipidaemia guidelines to nationwide data of patients with a recent myocardial infarction: a simulation study. <sup>233</sup>                                                                | No outcome of interest was reported. |
| Use and misuse of ezetimibe: Analysis of use and cost in Saskatchewan, a Canadian jurisdiction with broad access. <sup>234</sup>                                                                                               | The comparison is ineligible.        |
| Attainment of normal lipid levels among patients on lipid-modifying therapy in Hong Kong. <sup>235</sup>                                                                                                                       | The comparison is ineligible.        |
| Diagnosis, management and prognosis of familial hypercholesterolaemia in a UK tertiary cardiac centre. <sup>236</sup>                                                                                                          | The comparison is ineligible.        |
| Statin utilization and lipid goal attainment in high or very-high cardiovascular risk patients: Insights from Italian general practice. <sup>237</sup>                                                                         | The comparison is ineligible.        |
| Prediction of individual life-years gained without cardiovascular events from lipid, blood pressure, glucose, and aspirin treatment based on data of more than 500 000 patients with Type 2 diabetes mellitus. <sup>238</sup>  | The comparison is ineligible.        |
| Prevalence and Determinants of the Use of Lipid-Lowering Agents in a Population of Older Hospitalized Patients: the Findings from the REPOSI (REgistro POLiterapie Societa Italiana di Medicina Interna) Study. <sup>239</sup> | The comparison is ineligible.        |
| Low-density lipoprotein cholesterol goal achievement in patients with familial hypercholesterolemia in countries outside Western Europe: The International ChoLesterol management Practice Study. <sup>240</sup>               | No outcome of interest was reported. |
| Statin Discontinuation, Reinitiation, and Persistence Patterns among Medicare Beneficiaries after Myocardial Infarction: A Cohort Study. <sup>241</sup>                                                                        | The comparison is ineligible.        |
| Statins and other lipid-lowering therapy and pregnancy outcomes in homozygous familial hypercholesterolaemia: A retrospective review of 39 pregnancies. <sup>242</sup>                                                         | The comparison is ineligible.        |
| Suboptimal control of lipid levels: Results from the non-interventional Centralized Pan-Russian Survey of the Undertreatment of Hypercholesterolemia II (CEPHEUS II). <sup>243</sup>                                           | The comparison is ineligible.        |
| The Effect of Proprotein Convertase Subtilisin/Kexin Type 9 Inhibition on Sterol Absorption Markers in a Cohort of Real-World Patients. <sup>244</sup>                                                                         | No outcome of interest was reported. |
| An innovative lipid-lowering approach to enhance attainment of low-density lipoprotein cholesterol goals. <sup>245</sup>                                                                                                       | The comparison is ineligible.        |
| Low-Density Lipoprotein Cholesterol Target Attainment in Patients Surviving an Acute Coronary Syndrome in Thailand: Results from the Dyslipidaemia International Study (DYSIS) II. <sup>246</sup>                              | The comparison is ineligible.        |
| The association between achieving low-density lipoprotein cholesterol (LDL-C) goal and statin treatment in an employee population. <sup>247</sup>                                                                              | The comparison is ineligible.        |
| Longitudinal treatment patterns among US patients with atherosclerotic cardiovascular disease or familial hypercholesterolemia initiating lipid-lowering pharmacotherapy. <sup>248</sup>                                       | No outcome of interest was reported. |
| Simulation of lipid-lowering therapy intensification in a population with atherosclerotic cardiovascular disease. <sup>249</sup>                                                                                               | No outcome of interest was reported. |
| Treatment and Low-Density Lipoprotein Cholesterol Management in Patients Diagnosed With Clinical Atherosclerotic Cardiovascular Disease in Alberta. <sup>250</sup>                                                             | The comparison is ineligible.        |
| Contemporary use of lipid-lowering therapy for secondary prevention in Korean patients with atherosclerotic cardiovascular diseases. <sup>251</sup>                                                                            | No outcome of interest was reported. |
| Ezetimibe reduces low-density lipoprotein cholesterol (LDL-C) in renal transplant patients resistant to HMG-CoA reductase inhibitors. <sup>252</sup>                                                                           | The comparison is ineligible.        |
| Improvement in arterial stiffness after short-term treatment with PCSK9 inhibitors. <sup>253</sup>                                                                                                                             | It's a case series.                  |

|                                                                                                                                                                                                  |                                      |
|--------------------------------------------------------------------------------------------------------------------------------------------------------------------------------------------------|--------------------------------------|
| Ezetimibe prescriptions in older Canadian adults after an acute myocardial infarction: A population-based cohort study. <sup>254</sup>                                                           | The comparison is ineligible.        |
| Clinical Implications of Switching Lipid Lowering Treatment from Rosuvastatin to Other Agents in Primary Care. <sup>255</sup>                                                                    | The comparison is ineligible.        |
| Lipid Lowering Treatment and Eligibility for PCSK9 Inhibition in Post-Myocardial Infarction Patients in Italy: Insights from Two Contemporary Nationwide Registries. <sup>256</sup>              | No outcome of interest was reported. |
| Statins for primary prevention and rhabdomyolysis: A nationwide cohort study in France. <sup>257</sup>                                                                                           | The comparison is ineligible.        |
| Risk of hospitalized rhabdomyolysis associated with lipid-lowering drugs in a real-world clinical setting. <sup>258</sup>                                                                        | No outcome of interest was reported. |
| Management of lipid-lowering therapy in patients with cardiovascular events in the UK: A retrospective cohort study. <sup>259</sup>                                                              | The comparison is ineligible.        |
| Available oral lipid-lowering agents could bring most high-risk patients to target: an estimate based on the Dyslipidemia International Study II-Italy. <sup>188</sup>                           | The comparison is ineligible.        |
| Waist circumference as an independent risk factor for NODAT. <sup>260</sup>                                                                                                                      | The comparison is ineligible.        |
| Treatment gaps in adults with heterozygous familial hypercholesterolemia in the United States. <sup>261</sup>                                                                                    | The comparison is ineligible.        |
| Under-prescription of statins in patients with non-alcoholic fatty liver disease. <sup>262</sup>                                                                                                 | The comparison is ineligible.        |
| Are lipid-lowering drugs associated with a risk of cataract? A pharmacovigilance study. <sup>263</sup>                                                                                           | No outcome of interest was reported. |
| Retrospective analysis of the effects of a highly standardized mixture of Berberis aristata, Silybum marianum, and monacolins K and KA in patients with dyslipidemia. <sup>264</sup>             | The comparison is ineligible.        |
| A real-world experience of clinical, biochemical and genetic assessment of patients with homozygous familial hypercholesterolemia. <sup>265</sup>                                                | The comparison is ineligible.        |
| Utilization patterns of extended-release niacin in Canada: Analysis of an administrative claims database. <sup>129</sup>                                                                         | The comparison is ineligible.        |
| Longitudinal low density lipoprotein cholesterol goal achievement and cardiovascular outcomes among adult patients with familial hypercholesterolemia: The CASCADE FH registry. <sup>266</sup>   | The comparison is ineligible.        |
| Characteristics of lipid profile and effectiveness of management of dyslipidaemia in patients with acute coronary syndromes - Data from the TERCET registry with 19,287 patients. <sup>267</sup> | The comparison is ineligible.        |
| Clinical use and effectiveness of lipid lowering therapies in diabetes mellitus-an observational study from the Swedish National diabetes Register. <sup>268</sup>                               | No outcome of interest was reported. |
| Effect of lipid-lowering treatment on natural history of heterozygous familial hypercholesterolemia in past three decades. <sup>269</sup>                                                        | The comparison is ineligible.        |
| Secondary prevention advices after cardiovascular index event: From drug prescription to risk factors control in real world practice. <sup>270</sup>                                             | The comparison is ineligible.        |
| Lipid-lowering Therapy and Goal Achievement in High-risk Patients From French General Practice. <sup>271</sup>                                                                                   | The comparison is ineligible.        |
| Effectiveness of ezetimibe monotherapy in patients with hypercholesterolemia. <sup>272</sup>                                                                                                     | The comparison is ineligible.        |
| Cardiovascular risk in patients with familial hypercholesterolemia using optimal lipid-lowering therapy. <sup>273</sup>                                                                          | The comparison is ineligible.        |
| Current lipid management and low cholesterol goal attainment in common daily practice in Spain: The REALITY study. <sup>274</sup>                                                                | The comparison is ineligible.        |
| SAFEHEART risk-equation and cholesterol-year-score are powerful predictors of cardiovascular events in French patients with familial hypercholesterolemia. <sup>275</sup>                        | The comparison is ineligible.        |
| Cholesterol target value attainment and lipid-lowering therapy in patients with stable or acute coronary heart disease: Results from the Dyslipidemia International Study II. <sup>276</sup>     | The comparison is ineligible.        |
| Contemporary data on treatment practices for low-density lipoprotein cholesterol in 6794 patients with stable coronary heart disease across the world. <sup>277</sup>                            | The comparison is ineligible.        |
| Safety and efficacy of combined ezetimibe/simvastatin treatment and simvastatin monotherapy in patients with non-alcoholic fatty liver disease. <sup>193</sup>                                   | No outcome of interest was reported. |
| Comparison of renal effects of ezetimibe-statin combination versus statin monotherapy: A propensity-score-matched analysis. <sup>278</sup>                                                       | No outcome of interest was reported. |

|                                                                                                                                                                                                                                                                              |                                      |
|------------------------------------------------------------------------------------------------------------------------------------------------------------------------------------------------------------------------------------------------------------------------------|--------------------------------------|
| Attainment of multifactorial treatment targets among the elderly in a lipid clinic. <sup>279</sup>                                                                                                                                                                           | No outcome of interest was reported. |
| How effective are the ESC/EAS and 2013 ACC/AHA guidelines in treating dyslipidemia? Lessons from a lipid clinic. <sup>280</sup>                                                                                                                                              | No outcome of interest was reported. |
| Prior experience with cardiovascular medicines predicted longer persistence in people initiated to combinations of antihypertensive and lipid-lowering therapies: Findings from two australian cohorts. <sup>281</sup>                                                       | No outcome of interest was reported. |
| Demographic And Clinical Characteristics Of Patients Prescribed Proprotein Convertase Subtilisin/kexin Type 9 Inhibitor Therapy And Patients Whose Current Lipid-Lowering Therapy Was Modified. <sup>282</sup>                                                               | The comparison is ineligible.        |
| Real-world data to assess changes in low-density lipoprotein cholesterol and predicted cardiovascular risk after ezetimibe discontinuation post reporting of the Ezetimibe and Simvastatin in Hypercholesterolemia Enhances Atherosclerosis Regression trial. <sup>283</sup> | No outcome of interest was reported. |
| Simvastatin-ezetimibe combination therapy is associated with a lower rate of major adverse cardiac events in type 2 diabetics than high potency statins alone: A population-based dynamic cohort study. <sup>284</sup>                                                       | No outcome of interest was reported. |
| Low-density lipoprotein cholesterol outcomes post-non-PCSK9i lipid-lowering therapies in atherosclerotic cardiovascular disease and probable heterozygous familial hypercholesterolemia patients. <sup>285</sup>                                                             | No outcome of interest was reported. |
| Treatment patterns of lipid-lowering therapies and possible statin intolerance among statin users with clinical atherosclerotic cardiovascular disease (ASCVD) or diabetes mellitus (DM) in Taiwan. <sup>286</sup>                                                           | No outcome of interest was reported. |
| Impact of combination therapy with statin and ezetimibe on secondary prevention for post-acute myocardial infarction patients in the statin era. <sup>287</sup>                                                                                                              | No outcome of interest was reported. |
| Long-term safety and efficacy of triple combination ezetimibe/simvastatin plus extended-release niacin in patients with hyperlipidemia. <sup>288</sup>                                                                                                                       | The comparison is ineligible.        |
| Model-observational bridging study on the effectiveness of ezetimibe on cardiovascular morbidity and mortality in France: A population-based study. <sup>289</sup>                                                                                                           | No outcome of interest was reported. |
| Changes in LDL-C levels and goal attainment associated with addition of ezetimibe to simvastatin, atorvastatin, or rosuvastatin compared with titrating statin monotherapy. <sup>290</sup>                                                                                   | No outcome of interest was reported. |
| Changes in LDL-C levels and goal attainment associated with addition of ezetimibe to simvastatin, atorvastatin, or rosuvastatin compared with titrating statin monotherapy. <sup>291</sup>                                                                                   | No outcome of interest was reported. |
| Combination Therapy With Ezetimibe/Simvastatin Versus Statin Monotherapy for Low-Density Lipoprotein Cholesterol Reduction and Goal Attainment in a Real-World Clinical Setting. <sup>292</sup>                                                                              | No outcome of interest was reported. |
| Statin myopathy: A lipid clinic experience on the tolerability of statin Rechallenge. <sup>293</sup>                                                                                                                                                                         | No outcome of interest was reported. |
| Effectiveness of adherence to lipid lowering therapy on LDL-cholesterol in patients with very high cardiovascular risk: A real-world evidence study in primary care. <sup>294</sup>                                                                                          | No outcome of interest was reported. |
| Observational study of ezetimibe discontinuation in primary care practices in the UK. <sup>295</sup>                                                                                                                                                                         | The comparison is ineligible.        |
| Target-attainment rates of low-density lipoprotein cholesterol using lipid-lowering drugs one year after acute myocardial infarction in Sweden. <sup>296</sup>                                                                                                               | The comparison is ineligible.        |
| Prevalence of familial hypercholesterolemia in patients with acute coronary syndrome in Japan: Results of the EXPLORE-J study. <sup>297</sup>                                                                                                                                | The comparison is ineligible.        |
| Clinical and laboratory phenotype of patients experiencing statin intolerance attributable to myalgia. <sup>298</sup>                                                                                                                                                        | The comparison is ineligible.        |
| Unmet Patient Need in Statin Intolerance: the Clinical Characteristics and Management. <sup>299</sup>                                                                                                                                                                        | The comparison is ineligible.        |
| Lipid attainment among patients newly treated with lipid-altering drugs. <sup>300</sup>                                                                                                                                                                                      | The comparison is ineligible.        |
| Determinants for achieving the LDL-C target of lipid control for secondary prevention of cardiovascular events in Taiwan. <sup>301</sup>                                                                                                                                     | The comparison is ineligible.        |
| The use of primary care electronic health records for research: Lipid medications and mortality in elderly patients. <sup>302</sup>                                                                                                                                          | The comparison is ineligible.        |

|                                                                                                                                                                                                                                                                                                                |                                      |
|----------------------------------------------------------------------------------------------------------------------------------------------------------------------------------------------------------------------------------------------------------------------------------------------------------------|--------------------------------------|
| Use of ezetimibe in the United States and Canada. <sup>303</sup>                                                                                                                                                                                                                                               | No outcome of interest was reported. |
| Impact of lipid-lowering therapy on the prevalence of dyslipidaemia in patients at high-risk of cardiovascular events in UK primary care - A retrospective database study. <sup>304</sup>                                                                                                                      | The comparison is ineligible.        |
| Clinical characteristics and lipid lowering treatment of patients initiated on proprotein convertase subtilisin-kexin type 9 inhibitors: A nationwide cohort study. <sup>305</sup>                                                                                                                             | The comparison is ineligible.        |
| Statins and All-Cause Mortality in Patients Undergoing Hemodialysis. <sup>306</sup>                                                                                                                                                                                                                            | The comparison is ineligible.        |
| Discontinuation of Lipid Modifying Drugs Among Commercially Insured United States Patients in Recent Clinical Practice. <sup>307</sup>                                                                                                                                                                         | No outcome of interest was reported. |
| Use of lipid-lowering medications and the likelihood of achieving optimal LDL-cholesterol goals in coronary artery disease patients. <sup>308</sup>                                                                                                                                                            | No outcome of interest was reported. |
| Non-statin lipid-lowering therapy over time in very-high-risk patients: effectiveness of fixed-dose statin/ezetimibe compared to separate pill combination on LDL-C. <sup>309</sup>                                                                                                                            | The comparison is ineligible.        |
| Use of a treatment optimization algorithm involving statin-ezetimibe combination aids in achievement of guideline-based low-density lipoprotein targets in patients with dyslipidemia at high vascular risk Guideline-based Undertaking to Improve Dyslipidemia Management in Canada (GUIDANC). <sup>310</sup> | The comparison is ineligible.        |
| Impact of combined lipid lowering and blood pressure control on coronary plaque: myocardial ischemia treated by percutaneous coronary intervention and plaque regression by lipid lowering and blood pressure controlling assessed by intravascular ultrasonography (MILLION) study. <sup>311</sup>            | The comparison is ineligible.        |
| Comparison of different statin therapy to change low-density lipoprotein cholesterol and high-density lipoprotein cholesterol level in Korean patients with and without diabetes. <sup>312</sup>                                                                                                               | No outcome of interest was reported. |
| Utilization Patterns of Lipid-lowering Therapies in Patients With Atherosclerotic Cardiovascular Disease or Diabetes: A Population-based Study in South Korea. <sup>313</sup>                                                                                                                                  | No outcome of interest was reported. |
| Persistence with statin therapy in Hungary. <sup>314</sup>                                                                                                                                                                                                                                                     | No outcome of interest was reported. |
| Low-density lipoprotein cholesterol target achievement in patients at high risk for coronary heart disease. <sup>315</sup>                                                                                                                                                                                     | No outcome of interest was reported. |
| Use of Lipid-modifying Therapy and LDL-C Goal Attainment in a High-Cardiovascular-Risk Population in the Netherlands. <sup>316</sup>                                                                                                                                                                           | No outcome of interest was reported. |
| Latvian registry of familial hypercholesterolemia: The first report of three-year results. <sup>317</sup>                                                                                                                                                                                                      | The comparison is ineligible.        |
| Prevalence and extent of atherosclerotic coronary artery disease and related outcome based on coronary computed tomographic angiography in asymptomatic elderly patients: Retrospective cohort study. <sup>318</sup>                                                                                           | The comparison is ineligible.        |
| Lipid testing trends in the us before and after the release of the 2013 cholesterol treatment guidelines. <sup>319</sup>                                                                                                                                                                                       | No outcome of interest was reported. |
| A prospective study of statin use and mortality among 67,385 blacks and whites in the southeastern United States. <sup>320</sup>                                                                                                                                                                               | The comparison is ineligible.        |
| Predictors of adverse outcome in a diabetic population following acute coronary syndromes. <sup>321</sup>                                                                                                                                                                                                      | The comparison is ineligible.        |
| Managing dyslipidemia in primary care with restricted access to lipid-modifying therapy. <sup>322</sup>                                                                                                                                                                                                        | The comparison is ineligible.        |
| Association of glycaemia with lipids in adults with type 1 diabetes: Modification by dyslipidaemia medication. <sup>323</sup>                                                                                                                                                                                  | The comparison is ineligible.        |
| Use of lipid lowering drugs in patients at very high risk of cardiovascular events: An analysis on nearly 3,000,000 Italian subjects of the ARNO Observatory. <sup>324</sup>                                                                                                                                   | No outcome of interest was reported. |
| Remnant lipoprotein cholesterol and mortality after acute myocardial infarction: Further evidence for a hypercholesterolemia paradox from the TRIUMPH registry. <sup>325</sup>                                                                                                                                 | The comparison is ineligible.        |
| Utilization of lipid-modifying therapy and low-density lipoprotein cholesterol goal attainment in patients at high and very-high cardiovascular risk: Real-world evidence from Germany. <sup>326</sup>                                                                                                         | The comparison is ineligible.        |

|                                                                                                                                                                                                                                                                                                          |                                      |
|----------------------------------------------------------------------------------------------------------------------------------------------------------------------------------------------------------------------------------------------------------------------------------------------------------|--------------------------------------|
| Ezetimibe use and LDL-C Goal achievement: A retrospective database analysis of patients with clinical atherosclerotic cardiovascular disease or probable heterozygous familial hypercholesterolemia. <sup>327</sup>                                                                                      | The comparison is ineligible.        |
| Vascular age derived from coronary artery calcium score on the risk stratification of individuals with heterozygous familial hypercholesterolaemia. <sup>328</sup>                                                                                                                                       | The comparison is ineligible.        |
| One-Year Outcomes of Patients With Established Coronary Artery Disease Presenting With Acute Coronary Syndromes. <sup>329</sup>                                                                                                                                                                          | The comparison is ineligible.        |
| Room for manoeuvre when prescribing statins to dyslipidaemic patients on antiretroviral therapy. <sup>330</sup>                                                                                                                                                                                          | The comparison is ineligible.        |
| Treatment patterns, statin intolerance, and subsequent cardiovascular events among Japanese patients with high cardiovascular risk initiating statin therapy. <sup>331</sup>                                                                                                                             | The comparison is ineligible.        |
| Investigation into lipid management in acute coronary syndrome patients from the EXPLORE-J study. <sup>332</sup>                                                                                                                                                                                         | The comparison is ineligible.        |
| The clinical relevance of dysfunctional HDL in patients with coronary artery disease: A 3-year follow-up study. <sup>333</sup>                                                                                                                                                                           | The comparison is ineligible.        |
| Lipid-lowering treatment in hypercholesterolaemic patients: The CEPHEUS Pan-Asian survey. <sup>334</sup>                                                                                                                                                                                                 | It's a cross-sectional study.        |
| Long term follow-up of genetically confirmed patients with familial hypercholesterolemia treated with first and second-generation statins and then with PCSK9 monoclonal antibodies. <sup>335</sup>                                                                                                      | The comparison is ineligible.        |
| Residual inflammatory risk in coronary heart disease: incidence of elevated high-sensitive CRP in a real-world cohort. <sup>336</sup>                                                                                                                                                                    | The comparison is ineligible.        |
| Attainment of LDL-cholesterol treatment goals in patients with familial hypercholesterolemia: 5-year SAFEHEART registry follow-up. <sup>337</sup>                                                                                                                                                        | No outcome of interest was reported. |
| Effect of lipid-lowering treatment in cardiovascular disease prevalence in familial hypercholesterolemia. <sup>338</sup>                                                                                                                                                                                 | It's a case-control study.           |
| Clinical Management of High and Very High Risk Patients with Hyperlipidaemia in Central and Eastern Europe: An Observational Study. <sup>339</sup>                                                                                                                                                       | The comparison is ineligible.        |
| Management of High and Very High-Risk Subjects with Familial Hypercholesterolemia: Results from an Observational Study in Bulgaria. <sup>340</sup>                                                                                                                                                       | The comparison is ineligible.        |
| Effect of ezetimibe coadministered with statins in genotype-confirmed heterozygous FH patients. <sup>157</sup>                                                                                                                                                                                           | No outcome of interest was reported. |
| Baseline glucose homeostasis predicts the new onset of diabetes during statin therapy: A retrospective study in real life. <sup>341</sup>                                                                                                                                                                | The comparison is ineligible.        |
| Dyslipidemia and lipid-lowering treatment in a hematopoietic stem cell transplant cohort: 25 years of follow-up data. <sup>342</sup>                                                                                                                                                                     | The comparison is ineligible.        |
| Lipid-lowering treatment modifications among patients with hyperlipidemia and a prior cardiovascular event: a US retrospective cohort study. <sup>343</sup>                                                                                                                                              | The comparison is ineligible.        |
| Attainment of optional low-density lipoprotein cholesterol goal of less than 70 mg/dl and impact on prognosis of very high risk stable coronary patients: A 3-year follow-up. <sup>344</sup>                                                                                                             | The comparison is ineligible.        |
| Attainment of Recommended Lipid Targets in Patients With Familial Hypercholesterolemia: Real-World Experience With PCSK9 Inhibitors. <sup>345</sup>                                                                                                                                                      | The comparison is ineligible.        |
| Effects of lifestyle counseling and combination lipid-modifying therapy on lipoprotein-associated phospholipase A2 mass concentration. <sup>346</sup>                                                                                                                                                    | The comparison is ineligible.        |
| Improvement of low-density lipoprotein cholesterol target achievement rates through cardiac rehabilitation for patients after ST elevation myocardial infarction or non-ST elevation myocardial infarction in Germany: Results of the PATIENT CARE registry. <sup>347</sup>                              | It's a cross-sectional study.        |
| The antilipidemic effects of ezetimibe in patients with diabetes. <sup>348</sup>                                                                                                                                                                                                                         | The comparison is ineligible.        |
| Estimation of Eligibility for Proprotein Convertase Subtilisin/Kexin Type 9 Inhibitors and Associated Costs Based on the FOURIER Trial (Further Cardiovascular Outcomes Research with PCSK9 Inhibition in Subjects with Elevated Risk): Insights from the Department of Veterans Affairs. <sup>349</sup> | No outcome of interest was reported. |
| Very High-Risk ASCVD and Eligibility for Nonstatin Therapies Based on the 2018 AHA/ACC Cholesterol Guidelines. <sup>350</sup>                                                                                                                                                                            | No outcome of interest was reported. |
| Effect of ezetimibe on major atherosclerotic disease events and all-cause mortality. <sup>351</sup>                                                                                                                                                                                                      | No outcome of interest was reported. |

|                                                                                                                                                                                                                         |                                           |
|-------------------------------------------------------------------------------------------------------------------------------------------------------------------------------------------------------------------------|-------------------------------------------|
|                                                                                                                                                                                                                         | reported.                                 |
| Efficacy and safety of ezetimibe in combination with atorvastatin for acute coronary syndrome patients accompanied with type 2 diabetes: A Single-Center, Non-randomized Cohort Study. <sup>352</sup>                   | No outcome of interest was reported.      |
| Retrospective, observation study: Quantitative and qualitative effect of ezetimibe and HMG-CoA reductase inhibitors on LDL-cholesterol: Are there disappearance thresholds for small, dense LDL and IDL? <sup>353</sup> | The comparison is ineligible.             |
| Clinical outcome of statin plus ezetimibe versus high-intensity statin therapy in patients with acute myocardial infarction propensity-score matching analysis. <sup>354</sup>                                          | No outcome of interest was reported.      |
| Differential association of ezetimibe-simvastatin combination with major adverse cardiovascular events in patients with or without diabetes: a retrospective propensity score-matched cohort study. <sup>355</sup>      | No outcome of interest was reported.      |
| Retrospective study on antihyperlipidemic efficacy and safety of simvastatin, ezetimibe and their combination in Korean adults. <sup>356</sup>                                                                          | Follow-up duration is less than 24 weeks. |
| Impact of ezetimibe coadministered with statins on cardiovascular events following acute coronary syndrome: a 3-year population-based retrospective cohort study in Taiwan. <sup>357</sup>                              | No outcome of interest was reported.      |
| Effectiveness of a combination of ezetimibe and statins in patients with acute coronary syndrome and multiple comorbidities: A 6-year population-based cohort study. <sup>358</sup>                                     | No outcome of interest was reported.      |
| Effectiveness and safety of combinational therapy compared with intensified statin monotherapy in patients with coronary heart disease. <sup>359</sup>                                                                  | No outcome of interest was reported.      |
| Ezetimibe-simvastatin therapy reduce recurrent ischemic stroke risks in type 2 diabetic patients. <sup>360</sup>                                                                                                        | No outcome of interest was reported.      |
| Arterial stiffness improvement after adding on PCSK9 inhibitors or ezetimibe to high-intensity statins in patients with familial hypercholesterolemia: A Two-Lipid Center Real-World Experience. <sup>361</sup>         | No outcome of interest was reported.      |
| Intensive statin versus low-dose statin + ezetimibe treatment for fibrous cap thickness of coronary vulnerable plaques. <sup>362</sup>                                                                                  | No outcome of interest was reported.      |
| Ezetimibe in combination with a statin does not reduce all-cause mortality. <sup>363</sup>                                                                                                                              | No outcome of interest was reported.      |
| High-potency statin and ezetimibe use and mortality in survivors of an acute myocardial infarction: a population-based study. <sup>364</sup>                                                                            | No outcome of interest was reported.      |
| Cholesterol Treatment Patterns and Cardiovascular Clinical Outcomes Associated with Colesevelam HCl and Ezetimibe. <sup>365</sup>                                                                                       | No outcome of interest was reported.      |
| Statin use and lower extremity amputation risk in nonelderly diabetic patients. <sup>366</sup>                                                                                                                          | The comparison is ineligible.             |
| The value of surrogate markers to monitor cholesterol absorption, synthesis and bioconversion to bile acids under lipid lowering therapies. <sup>367</sup>                                                              | No outcome of interest was reported.      |
| Disease modifying therapies modulate cardiovascular risk factors in patients with multiple sclerosis. <sup>368</sup>                                                                                                    | The comparison is ineligible.             |
| Cardiovascular event rates and trajectories of LDL-cholesterol levels and lipid-lowering therapy in patients with atherosclerotic cardiovascular disease: A population-based cohort study. <sup>369</sup>               | The comparison is ineligible.             |
| Colesevelam, Ezetimibe, and Patients With Type 2 Diabetes Mellitus: Characteristics and Clinical Outcomes From a Health Care Database. <sup>370</sup>                                                                   | No outcome of interest was reported.      |
| Familial Hypercholesterolaemia in a Bulgarian Population of Patients with Dyslipidaemia and Diabetes: An Observational Study. <sup>371</sup>                                                                            | The comparison is ineligible.             |
| Usefulness of statin-ezetimibe combination to reduce the care gap in dyslipidemia management in patients with a high risk of atherosclerotic disease. <sup>372</sup>                                                    | The comparison is ineligible.             |
| Therapeutic practice patterns related to statin potency and ezetimibe/simvastatin combination therapies in lowering LDL-C in patients with high-risk cardiovascular disease. <sup>373</sup>                             | No outcome of interest was reported.      |
| LDL-cholesterol target achievement in patients with heterozygous familial hypercholesterolemia at Groote Schuur                                                                                                         | The comparison is ineligible.             |



|                                                                                                                                                               |                                                            |
|---------------------------------------------------------------------------------------------------------------------------------------------------------------|------------------------------------------------------------|
| Hospital: Minority at target despite large reductions in LDL-C. <sup>374</sup>                                                                                |                                                            |
| Predictors and outcomes of increases in creatine phosphokinase concentrations or rhabdomyolysis risk during statin treatment. <sup>375</sup>                  | The comparison is ineligible.                              |
| Adherence To Lipid-Lowering Therapy In Patients With Coronary Heart Disease From The State Of Saxony-Anhalt, Germany. <sup>376</sup>                          | No outcome of interest was reported.                       |
| First-line treatment patterns and lipid target levels attainment in very high cardiovascular risk outpatients. <sup>377</sup>                                 | No outcome of interest was reported.                       |
| New fibrate use and acute renal outcomes in elderly adults a population-based study. <sup>378</sup>                                                           | No outcome of interest was reported.                       |
| Statin-ezetimibe versus statin lipid-lowering therapy in patients with acute coronary syndromes undergoing percutaneous coronary intervention. <sup>379</sup> | Only one-month and three-month side effects were reported. |

**Table S7 Baseline Characteristics of each included randomized controlled trial**

| Trial                            | Location                        | Centers       | Randomized (I/C) | Follow-up  | duration of study treatment | prevention type | Treatment                                                                 | Control                                              | background treatment                                |
|----------------------------------|---------------------------------|---------------|------------------|------------|-----------------------------|-----------------|---------------------------------------------------------------------------|------------------------------------------------------|-----------------------------------------------------|
| Ballantyne 2004 <sup>380</sup>   | United States (multi-continent) | Multi-center  | 201/45           | 12 months  | 12 months                   | primary         | ezetimibe 10 mg/d                                                         | placebo                                              | atorvastatin 10 mg/d + NCEP Step I or stricter diet |
| ENHANCE 2008 <sup>381</sup>      | Netherlands (multi-continent)   | Multi-center  | 357/363          | 24 months  | 24 months                   | unspecific      | ezetimibe 10 mg/d                                                         | placebo                                              | simvastatin 80 mg/d                                 |
| HU-PROPER 2017 <sup>382</sup>    | Japan                           | Multi-center  | 869/865          | 3.86 years | 3.86 years                  | secondary       | ezetimibe 10mg/d                                                          | /                                                    | pitavastatin                                        |
| IMPROVE-IT 2015 <sup>383</sup>   | United States (multi-continent) | Multi-center  | 9067/9077        | 6 years    | 6 years                     | secondary       | Ezetimibe 10mg/d                                                          | placebo                                              | Simvastatin 40mg/d                                  |
| Kinouchi 2012 <sup>384</sup>     | Japan                           | Single-center | 28/26            | 12 months  | 12 months                   | unspecific      | ezetimibe 10 mg/d                                                         | /                                                    | fluvastatin 20 mg/d                                 |
| Kouvelos 2013 <sup>385</sup>     | Greece                          | Single-center | 126/136          | 12 months  | 12 months                   | secondary       | Ezetimibe 10 mg/d                                                         | /                                                    | rosuvastatin 10 mg/d                                |
| Liu 2017 <sup>386</sup>          | China                           | Single-center | 114/116          | 12 months  | 12 months                   | secondary       | atorvastatin 10 mg/d +ezetimibe10 mg/d                                    | atorvastatin 20 mg/d                                 | /                                                   |
| Luo 2014 <sup>387</sup>          | China                           | Single-center | 44/40            | 12 months  | 12 months                   | secondary       | ezetimibe 10 mg/d                                                         | /                                                    | atorvastatin 20 mg/d                                |
| Luo 2016 <sup>388</sup>          | China                           | Single-center | 74/74            | 12 months  | 12 months                   | secondary       | ezetimibe 10 mg/d                                                         | /                                                    | atorvastatin 20 mg/d                                |
| Okada 2012 <sup>389</sup>        | Japan                           | Multi-center  | 100/100          | 52 weeks   | 52 weeks                    | secondary       | Statin (atorvastatin 10 mg/d or rosuvastatin 2.5 mg/d) + ezetimibe10 mg/d | Statin (atorvastatin 20 mg/d or rosuvastatin 5 mg/d) | /                                                   |
| Ren 2017 <sup>390</sup>          | China                           | Single-center | 55/58            | 12 months  | 12 months                   | secondary       | Ezetimibe 10 mg/d                                                         | /                                                    | rosuvastatin 10 mg/d                                |
| RESEARCH 2017 <sup>391</sup>     | Japan                           | Multi-center  | 53/56            | 52 weeks   | 52 weeks                    | primary         | statin(atorvastatin 10 mg/d or pitavastatin 1 mg/d)+ezetimibe10 mg/d      | Statin (atorvastatin 20 mg/d or pitavastatin 2 mg/d) | /                                                   |
| PRECISE-IVUS 2015 <sup>392</sup> | Japan                           | Multi-center  | 122/124          | 12 months  | 9-12 months                 | secondary       | ezetimibe 10 mg/d                                                         | /                                                    | atorvastatin                                        |

|                                    |                 |               |         |           |           |            |                                                              |                                                                  |                                                                                                                                                                     |
|------------------------------------|-----------------|---------------|---------|-----------|-----------|------------|--------------------------------------------------------------|------------------------------------------------------------------|---------------------------------------------------------------------------------------------------------------------------------------------------------------------|
| VYCTOR 2009 <sup>393</sup>         | Mexico          | Single-center | 30/30   | 12 months | 12 months | unspecific | simvastatin 20/up to 40mg/d + ezetimibe 10mg/d               | simvastatin 40/up to 80mg/d                                      | /                                                                                                                                                                   |
| Wang 2016 <sup>394</sup>           | China           | Single-center | 55/51   | 12 months | 12 months | secondary  | Ezetimibe 10 mg/d                                            | /                                                                | Rosuvastatin 10 mg/d + lifestyle change                                                                                                                             |
| Wang 2017 <sup>395</sup>           | China           | Single-center | 51/49   | 12 months | 12 months | secondary  | ezetimibe 10 mg/d                                            | /                                                                | atorvastatin 20 mg/d                                                                                                                                                |
| West 2011 <sup>396</sup>           | United States   | Single-center | 22/22   | 2 years   | 2 years   | secondary  | ezetimibe 10 mg/d                                            | /                                                                | simvastatin 40 mg                                                                                                                                                   |
| GAUSS-3 <sup>397</sup>             | multi-continent | Multi-center  | 73/145  | 24 weeks  | 24 weeks  | unspecific | ezetimibe 10mg/d + injection placebo                         | evolocumab 420mg QM + oral placebo                               | /                                                                                                                                                                   |
| UK-HARP-II <sup>398</sup>          | United Kingdom  | Multi-center  | 101/102 | 6 months  | 6 months  | primary    | simvastatin 20 mg/d + ezetimibe 10 mg/d                      | simvastatin 20 mg/d + placebo                                    | /                                                                                                                                                                   |
| MOZART <sup>399</sup>              | United States   | Multi-center  | 25/25   | 24 weeks  | 24 weeks  | unspecific | ezetimibe 10 mg/d                                            | placebo                                                          | /                                                                                                                                                                   |
| Masana 2005 <sup>400</sup>         | multi-continent | Multi-center  | 355/78  | 48 weeks  | 48 weeks  | unspecific | ezetimibe 10 mg/d                                            | placebo                                                          | simvastatin                                                                                                                                                         |
| ODYSSEY ALTERNATIVE <sup>401</sup> | multi-continent | Multi-center  | 125/63  | 24 weeks  | 24 weeks  | unspecific | alirocumab subcutaneous placebo Q2W + oral ezetimibe 10 mg/d | alirocumab subcutaneous placebo Q2W + oral atorvastatin 20 mg/d  | diet (NCEP-ATP III TLC or equivalent) and background lipid-modifying therapy (other than ezetimibe, statins, red yeast rice, and fibrates [other than fenofibrate]) |
| ODYSSEY COMBO II <sup>402</sup>    | multi-continent | Multi-center  | 241/479 | 112 weeks | 104 weeks | secondary  | injection placebo SC Q2W + ezetimibe 10 mg/d + statin        | alirocumab 75 mg SC Q2W + placebo PO daily + statin              | NCEP-ATP III TLC or equivalent diet + statin at maximal tolerated daily dose                                                                                        |
| ODYSSEY EAST <sup>403</sup>        | multi-continent | Multi-center  | 208/407 | 32 weeks  | 24 weeks  | secondary  | placebo Q2W SC + ezetimibe 10 mg/d + statin                  | alirocumab 75 mg/up to 150 mg Q2W SC + placebo PO daily + statin | /                                                                                                                                                                   |
| ODYSSEY OPTIONS I <sup>404</sup>   | multi-continent | Multi-center  | 102/104 | 32 weeks  | 24 weeks  | unspecific | ezetimibe 10mg/d + injection placebo                         | Alirocumab 75/up to 150 mg Q2W + oral placebo                    | atorvastatin 20/40 mg/d                                                                                                                                             |

|                                   |                 |               |         |            |            |            |                                             |                                                                                                          |                                                              |
|-----------------------------------|-----------------|---------------|---------|------------|------------|------------|---------------------------------------------|----------------------------------------------------------------------------------------------------------|--------------------------------------------------------------|
| ODYSSEY OPTIONS II <sup>405</sup> | multi-continent | Multi-center  | 101/101 | 32 weeks   | 24 weeks   | secondary  | ezetimibe 10 mg/d + rosuvastatin 10/20 mg/d | double-dose (20/40 mg/d) rosuvastatin + oral placebo                                                     | injection placebo                                            |
| ODYSSEY MONO <sup>406</sup>       | multi-continent | Multi-center  | 51/52   | 32 weeks   | 24 weeks   | primary    | Ezetimibe 10 mg/d + injection placebo       | Alirocumab 75/up to 150 mg Q2W + oral placebo                                                            | NCEP-ATPIII therapeutic lifestyle changes or equivalent diet |
| Saito 2015 <sup>407</sup>         | Japan           | Multi-center  | 75/77   | 24 weeks   | 24 weeks   | primary    | ezetimibe 10 mg/d                           | placebo                                                                                                  | /                                                            |
| ARBITER 6-HALTS <sup>408</sup>    | United States   | Multi-center  | 176/187 | 14 months  | 14 months  | secondary  | ezetimibe 10 mg/d                           | extended-release niacin 500 mg/up to 2000 mg/d                                                           | statin                                                       |
| Yokote 2017 <sup>409</sup>        | Japan           | Multi-center  | 22/26   | 24 weeks   | 16 weeks   | primary    | ezetimibe 10mg/d                            | placebo                                                                                                  | atorvastatin                                                 |
| McKenney 2006 <sup>410</sup>      | NR              | Multi-center  | 340/236 | 48 weeks   | 48 weeks   | primary    | ezetimibe 10 mg/d                           | placebo                                                                                                  | fenofibrate 160 mg/d                                         |
| Masuda 2014 <sup>411</sup>        | Japan           | Single-center | 26/25   | 6 months   | 6 months   | secondary  | ezetimibe 10 mg/d                           | /                                                                                                        | rosuvastatin 5mg/d                                           |
| Jackowska 2016 <sup>412</sup>     | Poland          | NR            | 8/10    | 6 months   | 6 months   | secondary  | ezetimibe 10 mg/d + atorvastatin 10 mg/d    | atorvastatin 40 mg/d                                                                                     | /                                                            |
| Jachowska 2019 <sup>413</sup>     | Poland          | NR            | 20/20   | 6 months   | 6 months   | secondary  | ezetimibe 10 mg/d + atorvastatin 10 mg/d    | atorvastatin 40 mg/d                                                                                     | /                                                            |
| Habara 2014 <sup>414</sup>        | Japan           | Single-center | 32/31   | 9 months   | 9 months   | secondary  | ezetimibe 10 mg/d                           | /                                                                                                        | Fluvastatin 30 mg/d                                          |
| Gaudiani 2005 <sup>415</sup>      | United states   | Multi-center  | 104/110 | 24 weeks   | 24 weeks   | unspecific | ezetimibe 10 mg/d                           | simvastatin 20 mg/d                                                                                      | simvastatin 20 mg/d                                          |
| Dagli 2007 <sup>416</sup>         | Turkey          | Single-center | 50/50   | 6 months   | 6 months   | unspecific | ezetimibe 10 mg/d + pravastatin 10 mg/d     | pravastatin 40 mg/d                                                                                      | /                                                            |
| Arimura 2012 <sup>417</sup>       | Japan           | Single-center | 25/25   | 6-8 months | 6-8 months | secondary  | ezetimibe 10 mg/d + atorvastatin 10 mg/d    | atorvastatin 10 mg/d                                                                                     | aspirin and ticlopidine or clopidogrel                       |
| Nakou 2008 <sup>418</sup>         | Greece          | Single-center | 33/32   | 6 months   | 6 months   | primary    | ezetimibe 10 mg/d                           | /                                                                                                        | orlistat 120mg tid + individualized low-fat diet             |
| Pisciotta 2012 <sup>419</sup>     | Italy           | Single-center | 90/180  | 6 months   | 6 months   | primary    | ezetimibe 10 mg/d                           | a nutraceutical-combined pill (containing berberine 500 mg, policosanol 10 mg and red yeast rice 200 mg) | /                                                            |
| CuVIC <sup>420</sup>              | Japan           | Multi-center  | 129/131 | 6-8 months | 6-8 months | secondary  | ezetimibe 10 mg/d                           | /                                                                                                        | statin                                                       |

|                                    |                |               |        |           |           |            |                                         |                      |                                      |
|------------------------------------|----------------|---------------|--------|-----------|-----------|------------|-----------------------------------------|----------------------|--------------------------------------|
| Oh 2020 <sup>421</sup>             | South Korea    | Two-center    | 25/25  | 6 months  | 6 months  | secondary  | ezetimibe 10 mg/d + rosuvastatin 5 mg/d | rosuvastatin 20 mg/d | /                                    |
| Takeshita 2014 <sup>422</sup>      | Japan          | Single-center | 17/15  | 6 months  | 6 months  | unspecific | ezetimibe 10 mg/d                       | /                    | nutritional and exercise counselling |
| Shaw 2009 <sup>423</sup>           | United Kingdom | Single-center | 34/34  | 6 months  | 6 months  | unspecific | ezetimibe 10 mg/d                       | placebo              | usual treatment                      |
| Strony 2008 <sup>424</sup>         | United states  | Multi-center  | 87/22  | 12 months | 12 months | primary    | ezetimibe 10 mg/d                       | placebo              | simvastatin                          |
| Nakou 2012 <sup>425</sup>          | Greece         | Single-center | 38/39  | 6 months  | 6 months  | primary    | ezetimibe 10 mg/d                       | simvastatin 40 mg/d  | usual lifestyle recommendations      |
| Miklishanskaya 2015 <sup>426</sup> | Russia         | NR            | 50/50  | 6 months  | 6 months  | secondary  | ezetimibe 10 mg/d                       | /                    | simvastatin                          |
| Bajaj 2020 <sup>427</sup>          | Canada         | Multi-center  | 102/98 | 24 weeks  | 24 weeks  | primary    | ezetimibe 10 mg/d                       | colesevelam 3.75 g/d | /                                    |

Abbreviations: I/C, intervention/control; NR, not reported; Q2W, once per two weeks; QM, once per month; PO, per os; SC, subcutaneous; tid, three times a day.

| Trial                          | Age (ezetimibe group) | Age (control group) | Male% (ezetimibe group) | Male% (control group) | BMI (ezetimibe group) | BMI (control group) | LDL-C concentration (mg/dl) (ezetimibe group) | LDL-C concentration (mg/dl) (control group) | HDL-C concentration (mg/dl) (ezetimibe group) | HDL-C concentration (mg/dl) (control group) | triglycerides concentration (mg/dl) (ezetimibe group) | triglycerides concentration (mg/dl) (control group) |
|--------------------------------|-----------------------|---------------------|-------------------------|-----------------------|-----------------------|---------------------|-----------------------------------------------|---------------------------------------------|-----------------------------------------------|---------------------------------------------|-------------------------------------------------------|-----------------------------------------------------|
| Ballantyne 2004 <sup>380</sup> | 57.6±10               | 58.5±7              | 39                      | 51                    | NR                    | NR                  | 181.75±23.20                                  | 185.61±23.20                                | 54.14±15.47                                   | 50.27±11.60                                 | 165.63±65.54                                          | 159.43±65.54                                        |
| ENHANCE 2008 <sup>381</sup>    | 46.1±9.0              | 45.7±10.0           | 53.5                    | 49.3                  | 27.4±4.6              | 26.7±4.4            | 319.0±65.0                                    | 317.8±66.1                                  | 46.7±11.3                                     | 47.4±13.2                                   | 162.33±77.04                                          | 167.00±83.70                                        |
| HU-PROPER 2017 <sup>382</sup>  | 65.7±11.7             | 65.5±11.9           | 74.0                    | 77.1                  | 24.3±3.5              | 24.3±3.6            | 134.8±29.3                                    | 135.6±30.0                                  | 49.0±12.5                                     | 48.3±12.3                                   | 129.1±69.3                                            | 132.5±72.8                                          |
| IMPROVE-IT 2015 <sup>383</sup> | 63.6±9.7              | 63.6±9.8            | 75.5                    | 75.9                  | 28.3±5.2              | 28.3±5.2            | 93.8±22.96                                    | 93.8±23.11                                  | 42.1±11.85                                    | 42.2±11.85                                  | 137.6±64.44                                           | 137.5±64.44                                         |
| Kinouchi 2012 <sup>384</sup>   | 55.2±12.0             | 53.4±11.4           | 71.4                    | 61.5                  | 24.7±2.5              | 24.9±7.2            | 159±21                                        | 156±20                                      | 54±12                                         | 54±16                                       | 146.67±103.70                                         | 155.00±81.48                                        |

|                                       |             |            |      |      |            |            |              |              |             |             |               |                |
|---------------------------------------|-------------|------------|------|------|------------|------------|--------------|--------------|-------------|-------------|---------------|----------------|
| Kouvelos 2013 <sup>385</sup>          | 70±8        | 72±7       | 89.7 | 89.7 | NR         | NR         | 148.2±58.1   | 143±54.1     | 40.9±12.8   | 41.3±11     | 159 (median)  | 160.2 (median) |
| Liu 2017 <sup>386</sup>               | 84.2±2.9    | 84.0±1.8   | 52.6 | 50.9 | 25.6±3.5   | 25.4±3.9   | 85.07±23.20  | 88.94±30.94  | 46.40±11.60 | 50.27±11.60 | 132.86±88.57  | 141.72±132.86  |
| Luo 2014 <sup>387</sup>               | 67.21±6.40  | 66.31±5.82 | 55   | 50   | 24.43±4.61 | 24.72±4.42 | 126.45±13.92 | 128.00±17.79 | 45.24±14.69 | 45.63±17.79 | 201.95±42.52  | 208.15±56.69   |
| Luo 2016 <sup>388</sup>               | 60.76±11.56 | 61.55±9.72 | 54.1 | 59.5 | 25.23±4.67 | 24.68±5.42 | 138.05±14.69 | 136.12±17.79 | 45.24±15.47 | 46.02±17.79 | 219.66±38.97  | 226.75±56.69   |
| Okada 2012 <sup>389</sup>             | 65.7±10.1   | 65.9±8.7   | 73.1 | 73.6 | 25.1±3.0   | 25.3±3.8   | 111.9±22.6   | 109.3±23.2   | 51.4±11.4   | 51.3±12.2   | 142.83±78.15  | 135.60±61.26   |
| Ren 2017 <sup>390</sup>               | 57.3±1.5    | 60.7±1.3   | 87.3 | 79.3 | NR         | NR         | 116.01±37.12 | 113.30±39.44 | 40.22±10.05 | 40.99±8.89  | 170.06±100.97 | 156.78±92.12   |
| RESEARCH<br>2017 <sup>391</sup>       | 61.7±11.1   | 62.6±9.5   | 58.5 | 57.1 | NR         | NR         | 130.6±19.2   | 135.2±22.6   | 56.7±15.2   | 54.7±9.6    | 146.7±95.2    | 161.9±88.3     |
| PRECISE-IVUS<br>2015 <sup>392</sup>   | 66±10       | 67±10      | 78   | 78   | 24.8±3.4   | 24.9±3.1   | 109.8±25.4   | 108.3±26.3   | 41.1±9.5    | 40.0±10.3   | 117.67±57.04  | 122.33±49.63   |
| VYCTOR 2009 <sup>393</sup>            | 58±9        | 57±8       | 47.5 | 38.7 | 29±6       | 29±4       | 131±39       | 130±33       | 46±11       | 45±9        | 195±82        | 198±86         |
| Wang 2016 <sup>394</sup>              | 63±10       | 65±12      | 72   | 73   | NR         | NR         | 139.98±45.63 | 134.57±48.72 | 43.70±8.12  | 43.70±8.51  | 174.49±59.34  | 168.29±57.57   |
| Wang 2017 <sup>395</sup>              | 58±10       | 58±9       | 60.8 | 61.2 | NR         | NR         | 136.50±33.64 | 133.41±29.00 | NR          | NR          | 305.58±66.43  | 169.18±18.60   |
| West 2011 <sup>396</sup>              | 62±8        | 59±10      | 56   | 69   | 28±6       | 30±7       | 118±9        | 118±10       | 48±4        | 45±4        | 130±21        | 227±47         |
| GAUSS-3 <sup>397</sup>                | 58.5±9.4    | 59.0±11.1  | 46.6 | 53.8 | 28.5±5.9   | 27.8±4.4   | 221.9±70.2   | 218.8±73.1   | 50.2±15.5   | 49.7±15.4   | 173.50±77.04  | 179.17±78.15   |
| UK-HARP-II <sup>398</sup>             | 60±15       | 60±14      | 70   | 69   | 27.1±6.4   | 27.5±5.5   | 121          | 117          | 40          | 40          | 167           | 188            |
| MOZART <sup>399</sup>                 | 49.0±14.9   | 49.5±13.7  | 44   | 32   | 33.8±5.2   | 32.9±5.1   | 100.0±32.0   | 90.0±50.5    | NR          | NR          | 152.0±58.0    | 149.0±104.0    |
| Masana 2005 <sup>400</sup>            | 59±10.33    | 61±9.16    | 57   | 55   | 29.2±5.2   | 29.6±6.1   | 136.6±47.3   | 131.4±45.6   | 50.1±11.9   | 51.0±13.4   | 131.0±4.1     | 128.0±8.4      |
| ODYSSEY<br>ALTERNATIVE <sup>401</sup> | 62.8±10.1   | 63.4±8.9   | 53.6 | 55.6 | 28.4±4.9   | 29.7±5.4   | 193.5±70.9   | 187.3±59.5   | 50.7±14.1   | 51.1±12.5   | 151.00±91.11  | 174.33±94.07   |

|                                   |             |             |       |       |            |            |              |              |             |             |                        |                        |
|-----------------------------------|-------------|-------------|-------|-------|------------|------------|--------------|--------------|-------------|-------------|------------------------|------------------------|
| ODYSSEY COMBO II <sup>402</sup>   | 61.3±9.2    | 61.7±9.4    | 70.5  | 75.2  | 30.3±5.1   | 30.0±5.4   | 104.41±34.80 | 108.28±34.80 | 46.40±15.47 | 46.40±11.60 | 150.58±71.74           | 141.72±71.74           |
| ODYSSEY EAST <sup>403</sup>       | 58.3±11.2   | 58.8±10.7   | 70.2  | 77.4  | 25.2±3.0   | 25.6±3.7   | 111.2±49.8   | 110.7±48.5   | 43.2±11.3   | 43.7±11.4   | 134.77±61.11           | 130.83±58.59           |
| ODYSSEY OPTIONS I <sup>404</sup>  | 64.87±9.61  | 63.10±10.18 | 65.69 | 61.54 | 31.23±5.94 | 31.12±6.83 | 99.71±29.23  | 109.55±36.41 | 47.79±11.49 | 48.15±13.26 | 124.7±58.53            | 134.33±57.23           |
| ODYSSEY OPTIONS II <sup>405</sup> | 61.82±10.33 | 61.03±10.54 | 56.43 | 70.30 | 31.10±6.41 | 31.74±6.44 | 111.11±45.75 | 109.57±39.96 | 51.63±13.32 | 47.66±13.84 | 135.94±63.69           | 144.31±72.04           |
| ODYSSEY MONO <sup>406</sup>       | 59.6±5.3    | 60.8±4.6    | 52.9  | 53.8  | 28.4±6.7   | 30.1±5.9   | 138.3±24.5   | 141.1±27.1   | 59.9±19.2   | 54.3±16.1   | 119.33±49.63           | 120.33±47.41           |
| Saito 2015 <sup>407</sup>         | 59.3±10.8   | 60.0±9.7    | 61.3  | 62.3  | 26.2±5.3   | 25.7±3.9   | 138.6±11.2   | 139.4±10.4   | 55.0±13.5   | 53.7±12.8   | 119.6±57.3             | 129.5±63.8             |
| ARBITER 6-HALTS <sup>408</sup>    | 65±11       | 64±11       | 82    | 78    | 31.0±5.4   | 30.8±6.7   | 83.7±19.9    | 80.5±17.2    | 43.3±8.5    | 42.5±8.6    | 123.67±55.56           | 127.67±51.11           |
| Yokote 2017 <sup>409</sup>        | 58.2±10.7   | 58.2±11.2   | 54.5  | 50.0  | 24.7±2.6   | 25.6±3.3   | 135.36±24.75 | 135.90±24.70 | 56.98±9.61  | 58.54±14.68 | 147.75±49.63           | 140.00±58.89           |
| McKenney 2006 <sup>410</sup>      | 54.1±9.5    | 52.9±10.4   | 56.5  | 58.9  | 29.5±4.6   | 29.3±4.4   | 159.7±27.7   | 164.1±27.9   | 41.7±8.8    | 41.9±9.5    | 275.0±101.6            | 277.0±86.5             |
| Masuda 2014 <sup>411</sup>        | 64.0±7.9    | 70.2±7.6    | 90.5  | 84.2  | 24.7±4.3   | 23.8±2.0   | 131.8±25.6   | 123.0±27.0   | 53.1±11.8   | 47.1±12.5   | 129.7±5.1              | 144.9±4.8              |
| Jackowska 2016 <sup>412</sup>     | NR          | NR          | NR    | NR    | NR         | NR         | 104±35       | 101±15       | 50±10       | 46±7        | 144±52                 | 167±73                 |
| Jachowska 2019 <sup>413</sup>     | 63.65±7.39  | 61.80±7.10  | 80    | 90    | 25.76±2.18 | 26.66±2.60 | 110.70±30.49 | 111.85±20.22 | 53.49±9.32  | 52.70±12.42 | 131.80±57.77           | 130.95±55.40           |
| Habara 2014 <sup>414</sup>        | 69.8±7.8    | 68.8±7.8    | 65    | 83    | 24.5±3.0   | 23.5±4.0   | 122.5±33.6   | 109.1±30.2   | 49.9±13.0   | 48.1±10.2   | 126.0±50.4             | 113.0±60.6             |
| Gaudiani 2005 <sup>415</sup>      | 57.8±7.5    | 58.3±6.83   | 59.6  | 55.5  | 32.5±5.9   | 33.7±6.8   | 93.97±28.62  | 91.65±24.36  | 47.56±10.83 | 49.11±10.83 | 149.69±115.15 (median) | 151.46±110.72 (median) |
| Dagli 2007 <sup>416</sup>         | 53.2±12.2   | 57.1±11.1   | 46    | 52    | 25.7 ± 3.7 | 26.9 ± 3.4 | 158.1±47.5   | 165.7±29.7   | 43.7±11     | 46.3±10.25  | 270.3±158.9            | 243.5±96.8             |
| Arimura 2012 <sup>417</sup>       | 69±9        | 69±8        | 73    | 68    | 23.6±2.4   | 22.5±2.9   | 103.6±29.9   | 104.1±31.8   | 50.2±11.2   | 51.0±14.6   | 131.6±40.7             | 123.1±68.3             |

|                                    |            |            |      |      |            |            |              |              |             |             |               |              |
|------------------------------------|------------|------------|------|------|------------|------------|--------------|--------------|-------------|-------------|---------------|--------------|
| Nakou 2008 <sup>418</sup>          | 55±10      | 54±9       | 31   | 24.1 | 35.5±6.1   | 35.7±6.7   | 172±32       | 164±38       | 53±7        | 52±9        | 162.50±28.00  | 175.25±46.83 |
| Pisciotta 2012 <sup>419</sup>      | 58.3±12.3  | 57.3±12.1  | 40.8 | 40.8 | 23.5±2.8   | 23.9±2.9   | 207.27±20.11 | 207.27±18.56 | 60.71±13.15 | 59.94±13.53 | 148.80±29.23  | 135.52±57.57 |
| CuVIC <sup>420</sup>               | 66±11      | 67±9       | 83   | 73   | 25±4       | 24±4       | 96±31        | 99±36        | 44±12       | 46±12       | 135±71        | 144±74       |
| Oh 2020 <sup>421</sup>             | 59.6±9.9   | 59.2±9.7   | 84   | 92   | NR         | NR         | 127.5±32.8   | 123.6±40.3   | 45.0±11.0   | 46.1±13.9   | 121.0±70.5    | 128.0±78.7   |
| Takeshita 2014 <sup>422</sup>      | 50.4±12.0  | 55.5±11.6  | 64.7 | 64.3 | 30.5±4.9   | 27.7±6.6   | NR           | NR           | 52.59±12.76 | 54.14±11.99 | 126.66±39.86  | 118.69±40.74 |
| Shaw 2009 <sup>423</sup>           | 52±14      | 57±10      | 82   | 85   | NR         | NR         | 112.14±38.67 | 108.28±46.40 | 58.00±15.47 | 65.74±23.20 | 194.86±115.15 | 186.01±97.43 |
| Strony 2008 <sup>424</sup>         | 56.4±11.9  | 60.7±8.4   | 51   | 36   | 28.9±5.1   | 29.8±5.3   | 178.1±23.8   | 176.2±23.9   | 48.6±11.8   | 52.4±10.3   | 178.7±68.4    | 177.0±59.9   |
| Nakou 2012 <sup>425</sup>          | 54±5       |            | 43   |      | NR         | NR         | 170.8±20.1   | 178.7±34.2   | 55.0±11.6   | 55.8±14.6   | 163.2±88.59   | 178.4±90.37  |
| Miklishanskaya 2015 <sup>426</sup> | 62.25±2.17 | 60.25±1.83 | 74   | 78   | 28.00±0.83 | 26.75±0.83 | 157.39±40.22 | 138.82±31.32 | 43.31±11.60 | 48.72±8.51  | 139.06±52.26  | 132.86±52.26 |
| Bajaj 2020 <sup>427</sup>          | 59.0±10.3  | 59.9±10.2  | 51   | 45.9 | 29.9±7.2   | 29.7±6.1   | 96.7±21.3    | 97.8±24.3    | 45.24±10.44 | 46.02±11.99 | 134.63±62.89  | 143.49±63.77 |

Abbreviations: BMI, body mass index; LDL-C, low-density lipoprotein cholesterol; HDL-C, high-density lipoprotein cholesterol; NR, not reported.



**Table S8 Summary of subgroup analyses**

| Outcome                                                    | Subgroup              | RR                    | P value | Interaction Q | Interaction P |
|------------------------------------------------------------|-----------------------|-----------------------|---------|---------------|---------------|
| <b>Prevention type</b>                                     |                       |                       |         |               |               |
| Any cancer                                                 | Secondary prevention  | 1.01 (0.92 to 1.11)   | 0.84    | 3.58          | 0.17          |
|                                                            | Primary prevention    | 3.78 (0.60 to 23.77)  | 0.16    |               |               |
|                                                            | Unspecific            | 0.25 (0.03 to 2.20)   | 0.21    |               |               |
| Any fracture                                               | Secondary prevention  | 0.92 (0.75 to 1.12)   | 0.39    | 0.62          | 0.74          |
|                                                            | Unspecific            | 0.53 (0.06 to 4.45)   | 0.56    |               |               |
|                                                            | Primary prevention    | 0.34 (0.01 to 8.27)   | 0.51    |               |               |
| Discontinuation due to any adverse events                  | Primary prevention    | 1.03 (0.50 to 2.12)   | 0.94    | 0.40          | 0.82          |
|                                                            | Unspecific            | 0.85 (0.65 to 1.10)   | 0.21    |               |               |
|                                                            | Secondary prevention  | 0.92 (0.76 to 1.12)   | 0.40    |               |               |
| Discontinuation due to any gastrointestinal adverse events | Unspecific            | 1.18 (0.40 to 3.45)   | 0.77    | 0.48          | 0.79          |
|                                                            | Secondary prevention  | 3.71 (0.17 to 79.85)  | 0.40    |               |               |
|                                                            | Primary prevention    | 1.35 (0.32 to 5.75)   | 0.68    |               |               |
| Myalgia or muscular pain leading to discontinuation        | Unspecific            | 0.84 (0.52 to 1.36)   | 0.48    | 0.32          | 0.57          |
|                                                            | Secondary prevention  | 0.33 (0.01 to 7.75)   | 0.49    |               |               |
|                                                            | Primary prevention    | NA                    | NA      |               |               |
| Neurocognitive events                                      | Secondary prevention  | 1.48 (0.58 to 3.81)   | 0.41    | 0.00          | NA            |
|                                                            | Unspecific            | NA                    | NA      |               |               |
| New-onset DM                                               | Secondary prevention  | 0.80 (0.53 to 1.21)   | 0.29    | 3.02          | 0.22          |
|                                                            | Unspecific            | 9.18 (0.50 to 168.27) | 0.14    |               |               |
|                                                            | Primary prevention    | 1.20 (0.42 to 3.40)   | 0.73    |               |               |
| <b>Type of control</b>                                     |                       |                       |         |               |               |
| Any cancer                                                 | Placebo or usual care | 0.97 (0.69 to 1.35)   | 0.84    | 0.03          | 0.86          |
|                                                            | Active agent control  | 0.90 (0.44 to 1.86)   | 0.78    |               |               |
| Any fracture                                               | Placebo or usual care | 0.91 (0.74 to 1.12)   | 0.38    | 0.28          | 0.59          |
|                                                            | Active agent control  | 0.67 (0.22 to 2.05)   | 0.48    |               |               |
| Discontinuation due to any adverse events                  | Placebo or usual care | 1.02 (0.94 to 1.10)   | 0.70    | 2.06          | 0.15          |
|                                                            | Active agent control  | 0.76 (0.52 to 1.12)   | 0.17    |               |               |
| Discontinuation due to any gastrointestinal adverse events | Placebo or usual care | 1.37 (0.56 to 3.36)   | 0.49    | 0.02          | 0.90          |
|                                                            | Active agent control  | 1.16 (0.11 to 12.11)  | 0.90    |               |               |

|                                                            |                           |                      |      |      |      |
|------------------------------------------------------------|---------------------------|----------------------|------|------|------|
| Myalgia or muscular pain leading to discontinuation        | Placebo or usual care     | 0.33 (0.05 to 2.06)  | 0.24 | 1.01 | 0.31 |
|                                                            | Active agent control      | 0.88 (0.53 to 1.45)  | 0.61 |      |      |
| Neurocognitive events                                      | Placebo or usual care     | 2.00 (0.18 to 22.08) | 0.57 | 0.07 | 0.79 |
|                                                            | Active agent control      | 1.40 (0.50 to 3.91)  | 0.52 |      |      |
| New-onset DM                                               | Placebo or usual care     | 0.84 (0.51 to 1.37)  | 0.48 | 0.10 | 0.76 |
|                                                            | Active agent control      | 0.95 (0.53 to 1.71)  | 0.86 |      |      |
| <b>Risk of bias</b>                                        |                           |                      |      |      |      |
| Discontinuation due to any adverse events                  | Low                       | 0.92 (0.82 to 1.04)  | 0.19 | 0.30 | 0.58 |
|                                                            | High                      | 1.45 (0.29 to 7.32)  | 0.65 |      |      |
| Discontinuation due to any gastrointestinal adverse events | Low                       | 1.04 (0.37 to 2.87)  | 0.95 | 0.73 | 0.39 |
|                                                            | High                      | 2.24 (0.53 to 9.41)  | 0.27 |      |      |
| Myalgia or muscular pain leading to discontinuation        | High                      | 0.33 (0.01 to 7.86)  | 0.50 | 0.32 | 0.57 |
|                                                            | Low                       | 0.84 (0.52 to 1.36)  | 0.48 |      |      |
| <b>Follow-up duration</b>                                  |                           |                      |      |      |      |
| Any cancer                                                 | Follow-up $\geq$ 48 weeks | 1.01 (0.92 to 1.11)  | 0.80 | 0.13 | 0.72 |
|                                                            | Follow-up <48 weeks       | 0.79 (0.21 to 3.01)  | 0.73 |      |      |
| Any fracture                                               | Follow-up $\geq$ 48 weeks | 0.92 (0.75 to 1.13)  | 0.43 | 1.45 | 0.23 |
|                                                            | Follow-up <48 weeks       | 0.42 (0.12 to 1.49)  | 0.18 |      |      |
| Discontinuation due to any adverse events                  | Follow-up $\geq$ 48 weeks | 0.87 (0.72 to 1.05)  | 0.16 | 0.00 | 1.00 |
|                                                            | Follow-up <48 weeks       | 0.87 (0.63 to 1.21)  | 0.42 |      |      |
| Discontinuation due to any gastrointestinal adverse events | Follow-up $\geq$ 48 weeks | 1.27 (0.34 to 4.69)  | 0.72 | 0.01 | 0.92 |
|                                                            | Follow-up <48 weeks       | 1.39 (0.47 to 4.08)  | 0.55 |      |      |
| Myalgia or muscular pain leading to discontinuation        | Follow-up $\geq$ 48 weeks | 0.33 (0.04 to 3.10)  | 0.33 | 0.66 | 0.42 |
|                                                            | Follow-up <48 weeks       | 0.86 (0.52 to 1.40)  | 0.54 |      |      |
| Neurocognitive events                                      | Follow-up $\geq$ 48 weeks | 1.72 (0.60 to 4.94)  | 0.32 | 0.37 | 0.54 |
|                                                            | Follow-up <48 weeks       | 0.83 (0.10 to 6.72)  | 0.86 |      |      |
| New-onset DM                                               | Follow-up $\geq$ 48 weeks | 0.76 (0.49 to 1.20)  | 0.24 | 1.28 | 0.26 |
|                                                            | Follow-up <48 weeks       | 1.23 (0.62 to 2.44)  | 0.56 |      |      |

Abbreviations: RR, relative ratio; DM, diabetes mellitus; NA, not available

**Table S9 Summary of Begg's rank correlation test and Egger's linear regression test**

| <b>Outcomes</b>                           | <b>t for Begg</b> | <b>P for Begg</b> | <b>Z for Egger</b> | <b>P for Egger</b> |
|-------------------------------------------|-------------------|-------------------|--------------------|--------------------|
| Any cancer                                | -0.63             | 0.53              | -0.41              | 0.69               |
| Discontinuation due to any adverse events | 1.35              | 0.18              | -1.44              | 0.16               |

**Table S10 Baseline characteristics of the included observational studies**

| Study                   | % of patients receiving statin at baseline | Mean age (ezetimibe group) | Mean age (control group) | Male% (ezetimibe group) | Male% (control group) | Mean BMI (ezetimibe group) | Mean BMI (control group) | Mean LDL-C (mg/dl) (ezetimibe group) | Mean LDL-C (mg/dl) (control group) | Mean HDL-C (mg/dl) (ezetimibe group) | Mean HDL-C (mg/dl) (control group) | Mean TG (mg/dl) (ezetimibe group) | Mean TG (mg/dl) (control group) |
|-------------------------|--------------------------------------------|----------------------------|--------------------------|-------------------------|-----------------------|----------------------------|--------------------------|--------------------------------------|------------------------------------|--------------------------------------|------------------------------------|-----------------------------------|---------------------------------|
| Barkas 2016             | 16*                                        | 52.33†                     | 56.67†                   | 45                      | 43                    | 26.83†                     | 27.40†                   | 201.67†                              | 170.67†                            | 54.67†                               | 52.67†                             | 120.33†                           | 142.33†                         |
| Kim 2017                | 0                                          | 64.17                      | 64.05                    | 29.9                    | 27.1                  | 24.02                      | 24.04                    | NR                                   | NR                                 | NR                                   | NR                                 | NR                                | NR                              |
| Kłosiwicz-Latoszek 2018 | NR                                         | NR                         | NR                       | NR                      | NR                    | NR                         | NR                       | 259.09†                              | 230.86†                            | NR                                   | NR                                 | NR                                | NR                              |
| Rivers 2007             | 100                                        | 62.5‡                      |                          | 50‡                     |                       | 31.4‡                      |                          | 166‡                                 |                                    | 57‡                                  |                                    | 240‡                              |                                 |

\*Data in specific sub-population of interest were not available, so data in overall population were presented.

†Mean was estimated from median and IQR.

‡Data were not reported in each group respectively, only data in overall population were presented.

Abbreviations: LDL-C, low-density lipoprotein cholesterol; HDL-C, high-density lipoprotein cholesterol; TG, triglycerides, NR, not reported

**Table S11 Risk of bias of included observational studies**

| Study                    | Representativeness of the Exposed Cohort (0-1) | Selection of the Non-Exposed Cohort (0-1) | Ascertainment of Exposure (0-1) | Demonstration That Outcome of Interest Was Not Present at Start of Study (0-1) | Comparability of Cohorts on the Basis of the Design or Analysis (0-2) | Assessment of Outcome (0-1) | Was Follow-Up Long Enough for Outcomes to Occur (0-1) | Adequacy of Follow Up of Cohorts (0-1) | Other Concerns (0-1) | Total score |
|--------------------------|------------------------------------------------|-------------------------------------------|---------------------------------|--------------------------------------------------------------------------------|-----------------------------------------------------------------------|-----------------------------|-------------------------------------------------------|----------------------------------------|----------------------|-------------|
| Barkas 2016              | 0*                                             | 1                                         | 1                               | 1                                                                              | 2                                                                     | 0 <sup>#</sup>              | 1                                                     | 1                                      | 0 <sup>‡</sup>       | 7           |
| Kim 2017                 | 0*                                             | 1                                         | 1                               | 1                                                                              | 1 <sup>§</sup>                                                        | 1                           | 1                                                     | 1                                      | 0 <sup>**</sup>      | 7           |
| Kłosiewicz-Latoszek 2018 | 1                                              | 1                                         | 0 <sup>#</sup>                  | 1                                                                              | 0 <sup>†</sup>                                                        | 1                           | 1                                                     | 0 <sup>#</sup>                         | 1                    | 6           |
| Rivers 2007              | 0*                                             | 1                                         | 1                               | 1                                                                              | 0 <sup>†</sup>                                                        | 1                           | 1                                                     | 1                                      | 0 <sup>##</sup>      | 6           |

\* Potential selection bias in exclusion criteria.

<sup>#</sup> No explicit statement.

<sup>§</sup> Adjusted effect estimate was presented without specifying adjusted covariates.

<sup>†</sup> Only raw event data were reported without matching or adjustment.

<sup>‡</sup> It's a post-hoc analysis.

<sup>\*\*</sup> Indirect comparison.

<sup>##</sup> Incomplete data reporting.

**Table S12 Summary of previously published meta-analyses on the effects of ezetimibe on safety outcomes**

| <b>Study</b>                    | <b>Key Findings</b>                                                                                                                                                                                                                                     |
|---------------------------------|---------------------------------------------------------------------------------------------------------------------------------------------------------------------------------------------------------------------------------------------------------|
| Battaglia 2015 <sup>428</sup>   | The study included 7 studies and showed a non-significant tendency with ezetimibe towards damage for cancer (RR, 2.14; 95%CI, 0.07–64.24).                                                                                                              |
| Savarese 2015 <sup>429</sup>    | The study included 7 studies and showed ezetimibe was not associated with cancer (RR, 1.040; 95% CI, 0.965–1.120).                                                                                                                                      |
| Zhao 2019 <sup>430</sup>        | The study included 84 studies and showed ezetimibe was not associated with new-onset DM (Network OR, 0.90; 95%CI, 0.04–20.25). But ezetimibe was associated with increased rate of neurocognitive adverse events (Network OR, 3.94; 95%CI, 1.18–13.12). |
| Chaiyasothi 2019 <sup>431</sup> | The study included 67 studies and suggested ezetimibe was not associated with discontinuation due to any adverse events (RR, 0.90; 95%CI, 0.74–1.11).                                                                                                   |
| Davidson 2005 <sup>432</sup>    | The study included 17 studies and showed that the incidence of myalgia or muscular pain leading to discontinuation was no more common in patients taking ezetimibe/simvastatin (18/4558, 0.4%) than in those taking simvastatin alone (9/2563, 0.4%).   |
| Pandor 2008 <sup>433</sup>      | The study included 8 studies and showed that the incidence of discontinuation due to any adverse events in patients taking ezetimibe (69/1791, 3.85%) was similar to that in those taking placebo (31/931, 3.33%).                                      |

Abbreviations: CI, confidence interval; RR, relative ratio; OR, odds ratio; DM, diabetes mellitus

**Table S13 Meta-regression according to different baseline LDL-c levels**

| <b>Outcome</b>                                             | <b>Coefficient</b> | <b>95% CI</b>     | <b>P value</b> |
|------------------------------------------------------------|--------------------|-------------------|----------------|
| Discontinuation due to any adverse events                  | 0.0013             | (-0.0015, 0.0041) | 0.3536         |
| Discontinuation due to any gastrointestinal adverse events | -0.0003            | (-0.0094, 0.0089) | 0.9543         |
| Any cancer                                                 | -0.0065            | (-0.0159, 0.0030) | 0.1785         |
| New-onset Diabetes mellitus                                | 0.0115             | (-0.0130, 0.0359) | 0.3569         |
| Neurocognitive events                                      | -0.0376            | (-0.2166, 0.1414) | 0.6804         |
| Any fracture                                               | -0.0024            | (-0.0210, 0.0162) | 0.7992         |
| Myalgia or muscular pain leading to discontinuation        | 0.0094             | (-0.0081, 0.0268) | 0.2916         |

## Reference

1. Anonymous. Ezetimibe add-on to statin therapy for effectiveness trial (EASE). *ACC Current Journal Review* 2004;13(7):14-15. doi: <http://dx.doi.org/10.1016/j.accreview.2004.07.001>
2. Katsiki N, Athyros VG, Mikhailidis DP. More news from IMPROVE-IT (IMProved Reduction of Outcomes: Vytorin Efficacy International Trial). *Hormones* 2016;15(1):5-7. doi: <https://dx.doi.org/10.14310/horm.2002.1658>
3. Tada H, Kobayashi J, Kawashiri MA, et al. Changes in lipoprotein lipase and endothelial lipase mass in familial hypercholesterolemia during three-drug lipid-lowering combination therapy. *Lipids in health and disease* 2016;15:66. doi: 10.1186/s12944-016-0238-z
4. Takase S, Matoba T. Response by takase and matoba to letter regarding article, "ezetimibe in combination with statins ameliorates endothelial dysfunction in coronary arteries after stenting: The cuvic trial (effect of cholesterol absorption inhibitor usage on target vessel dysfunction after coronary stenting), a multicenter randomized controlled trial". *Arteriosclerosis, Thrombosis, and Vascular Biology* 2017;37(5):e54. doi: <http://dx.doi.org/10.1161/ATVBAHA.117.309301>
5. Troxel AB, Asch DA, Mehta SJ, et al. Rationale and design of a randomized trial of automated hovering for post-myocardial infarction patients: The HeartStrong program. *American Heart Journal* 2016;179:166-74. doi: <http://dx.doi.org/10.1016/j.ahj.2016.06.006>
6. Westerink J, Visseren F. Letter by westerink and visseren regarding article, "ezetimibe in combination with statins ameliorates endothelial dysfunction in coronary arteries after stenting: The cuvic trial (effect of cholesterol absorption inhibitor usage on target vessel dysfunction after coronary stenting), a multicenter randomized controlled trial". *Arteriosclerosis, Thrombosis, and Vascular Biology* 2017;37(5):e53. doi: <http://dx.doi.org/10.1161/ATVBAHA.117.309295>
7. Letter by Koh Regarding Article, "Benefit of Adding Ezetimibe to Statin Therapy on Cardiovascular Outcomes and Safety in Patients With Versus Without Diabetes Mellitus: results From IMPROVE-IT (Improved Reduction of Outcomes: vytorin Efficacy International Trial)". *Circulation* 2018;138(17):1914-15. doi: 10.1161/CIRCULATIONAHA.118.035512
8. Letter by Donzelli et al Regarding Article, "Benefit of Adding Ezetimibe to Statin Therapy on Cardiovascular Outcomes and Safety in Patients With Versus Without Diabetes Mellitus: results From IMPROVE-IT (Improved Reduction of Outcomes: vytorin Efficacy International Trial)". *Circulation* 2018;138(17):1912-13. doi: 10.1161/CIRCULATIONAHA.118.034068
9. Letter by del pinto et al regarding article, "prevention of stroke with the addition of ezetimibe to statin therapy in patients with acute coronary syndrome in IMPROVE-IT (Improved Reduction of Outcomes: vytorin Efficacy International Trial)". *Circulation* 2018;137(24):2654-55. doi: 10.1161/CIRCULATIONAHA.117.032448



10. Letter by thomopoulos and michalopoulou regarding article, "prevention of stroke with the addition of ezetimibe to statin therapy in patients with acute coronary syndrome in IMPROVE-IT (Improved reduction of outcomes: vytorin efficacy international trial)". *Circulation* 2018;137(24):2656-57. doi: 10.1161/CIRCULATIONAHA.117.032249
11. Letter by koh regarding article, "prevention of stroke with the addition of ezetimibe to statin therapy in patients with acute coronary syndrome in IMPROVE-IT (Improved Reduction of Outcomes: vytorin Efficacy International Trial)". *Circulation* 2018;137(24):2660-61. doi: 10.1161/CIRCULATIONAHA.118.033569
12. Letter by cordero et al regarding article, "prevention of stroke with the addition of ezetimibe to statin therapy in patients with acute coronary syndrome in IMPROVE-IT (Improved reduction of outcomes: vytorin efficacy international trial)". *Circulation* 2018;137(24):2658-59. doi: 10.1161/CIRCULATIONAHA.118.033559
13. If the IMPROVE-IT Trial Was Positive, as Reported, Why Did the FDA Denied Expanded Approval for Ezetimibe and Simvastatin? An Explanation of the Tipping Point Analysis. *Journal of general internal medicine* 2018;1-2. doi: 10.1007/s11606-018-4498-3
14. Hodges GW, Bang CN, Forman JL, et al. Effect of simvastatin and ezetimibe on suPAR levels and outcomes. *Atherosclerosis* 2018;272:129-36. doi: 10.1016/j.atherosclerosis.2018.03.030
15. Early combination therapy pays off. *MMW fortschritte der medizin* 158 (11) (pp 76), 2016 Date of publication: 09 jun 2016 2016 doi: 10.1007/s15006-016-8390-y
16. Abdelbary G, Nebsen M. Application of a novel UPLC-MS/MS method for the pharmacokinetic/bioequivalence determination of atorvastatin and ezetimibe in human plasma. *Journal of pharmacy research* 2013;7(1):24-32. doi: 10.1016/j.jopr.2013.01.010
17. Almquist T, Jacobson SH, Lins PE, et al. Effects of lipid-lowering treatment on platelet reactivity and platelet-leukocyte aggregation in diabetic patients without and with chronic kidney disease: a randomized trial. *Nephrology, dialysis, transplantation* 2012;27(9):3540-46. doi: 10.1093/ndt/gfs183
18. Almquist T, Mobarrez F, Jacobson SH, et al. Effects of lipid-lowering treatment on circulating microparticles in patients with diabetes mellitus and chronic kidney disease. *Nephrology, dialysis, transplantation* 2016;31(6):944-52. doi: 10.1093/ndt/gfv337
19. Araujo DB, Bertolami MC, Ferreira WP, et al. Pleiotropic effects with equivalent low-density lipoprotein cholesterol reduction: comparative study between simvastatin and simvastatin/ezetimibe coadministration. *Journal of cardiovascular pharmacology* 2010;55(1):1-5. doi: 10.1097/FJC.0b013e3181bfb1a2
20. Bahlmann E, Cramariuc D, Gerds E, et al. Impact of pressure recovery on echocardiographic assessment of asymptomatic aortic stenosis: a SEAS substudy. *JACC Cardiovascular imaging* 2010;3(6):555-62. doi: 10.1016/j.jcmg.2009.11.019

21. Bajaj HS, Brown RE, Jiandani DS, et al. Goal-RCT: results from the first randomized trial comparing colesevelam vs. ezetimibe in type 2 diabetes. *Circulation* 2017;136
22. Bahrami G, Mohammadi B, Khatabi PM, et al. Application of one-step liquid chromatography-electrospray tandem MS/MS and collision-induced dissociation to quantification of ezetimibe and identification of its glucuronated metabolite in human serum: a pharmacokinetic study. *Journal of chromatography B, analytical technologies in the biomedical and life sciences* 2010;878(28):2789-95. doi: 10.1016/j.jchromb.2010.08.023
23. Ballantyne C, Blazing M, King T, et al. Efficacy of co-administered ezetimibe plus simvastatin versus atorvastatin alone in adults with hypercholesterolemia. *Atherosclerosis Supplements* 2004;5(1):105.
24. Ballantyne C, Laufs U, Ray KK, et al. Efficacy and Safety of Bempedoic Acid + Ezetimibe Fixed-Dose Combination in Patients at High CVD Risk and with Elevated LDL-C Receiving Maximally Tolerated Statin Therapy. *Atherosclerosis* 2019;287:e7-e8. doi: 10.1016/j.atherosclerosis.2019.06.020
25. Ballantyne CM, Hourii J, Notarbartolo A, et al. Effect of ezetimibe coadministered with atorvastatin in 628 patients with primary hypercholesterolemia: a prospective, randomized, double-blind trial. *Circulation* 2003;107(19):2409-15. doi: 10.1161/01.CIR.0000068312.21969.C8
26. Ballantyne CM, Laufs U, Ray KK, et al. Bempedoic acid plus ezetimibe fixed-dose combination in patients with hypercholesterolemia and high CVD risk treated with maximally tolerated statin therapy. *European journal of preventive cardiology* 2019 doi: 10.1177/2047487319864671
27. Ballantyne CM, Weiss R, Moccetti T, et al. Efficacy and safety of rosuvastatin 40 mg alone or in combination with ezetimibe in patients at high risk of cardiovascular disease (results from the EXPLORER study). *American Journal of Cardiology* 2007;99(5):673-80.
28. Izar MC, Barbosa SP, Lins LC, et al. Effects of ezetimibe on markers of synthesis and absorption of cholesterol in high-risk patients with elevated C-reactive protein. *European heart journal* 2013;34:768-69.
29. Bardini G, Giorda CB, Pontiroli AE, et al. Ezetimibe + simvastatin versus doubling the dose of simvastatin in high cardiovascular risk diabetics: a multicenter, randomized trial (the LEAD study). *Cardiovascular diabetology* 2010;9:20. doi: 10.1186/1475-2840-9-20
30. Bays H, Conard S, Leiter LA, et al. Are post-treatment low-density lipoprotein subclass pattern analyses potentially misleading? *Lipids in health and disease* 2010;9:136. doi: 10.1186/1476-511X-9-136
31. Bays HE, Averna M, Majul C, et al. Efficacy and safety of ezetimibe added to atorvastatin versus atorvastatin uptitration or switching to rosuvastatin in patients with primary hypercholesterolemia. *American journal of cardiology* 2013;112(12):1885-95. doi: 10.1016/j.amjcard.2013.08.031

32. Bays HE, Ose L, Fraser N, et al. A multicenter, randomized, double-blind, placebo-controlled, factorial design study to evaluate the lipid-altering efficacy and safety profile of the ezetimibe/simvastatin tablet compared with ezetimibe and simvastatin monotherapy in patients with primary hypercholesterolemia. *Clinical therapeutics* 2004;26(11):1758-73. doi: 10.1016/j.clinthera.2004.11.016
33. Bays HE, Shah A, Macdonell G, et al. Effects of coadministered ezetimibe plus fenofibrate in mixed dyslipidemic patients with metabolic syndrome. *Metabolic syndrome and related disorders* 2011;9(2):135-42. doi: 10.1089/met.2010.0068
34. Briguori C, Madonna R, Zimarino M, et al. Rosuvastatin for Reduction of Myocardial Damage during Coronary Angioplasty - the Remedy Trial. *Cardiovascular drugs and therapy / sponsored by the International Society of Cardiovascular Pharmacotherapy* 2016;30(5):465-72. doi: 10.1007/s10557-016-6672-3
35. Brohet C, Banai S, Alings AM, et al. LDL-C goal attainment with the addition of ezetimibe to ongoing simvastatin treatment in coronary heart disease patients with hypercholesterolemia. *Current medical research and opinion* 2005;21(4):571-78. doi: 10.1185/030079905X382004
36. Brown BG, Taylor AJ. Does ENHANCE diminish confidence in lowering LDL or in ezetimibe? *New england journal of medicine* 2008;358(14):1504-07.
37. Brudi P, Reckless JP, Henry DP, et al. Efficacy of ezetimibe/simvastatin 10/40 mg compared to doubling the dose of low-, medium- and high-potency statin monotherapy in patients with a recent coronary event. *Cardiology* 2009;113(2):89-97. doi: 10.1159/000172795
38. Richard T, Lelubre C, Vanhaeverbeek M. Ezetimibe plus a statin after acute coronary syndromes. *New England journal of medicine* 2015;373(15):1475.
39. Chirinos JA, Williams MM, Bregman DB, et al. Efficacy of cholesterol uptake inhibition added to statin therapy among subjects following a low-carbohydrate diet: a randomized controlled trial. *American heart journal* 2010;159(5):918.e1-6. doi: 10.1016/j.ahj.2010.02.010
40. Cho L, Rocco M, Colquhoun D, et al. Design and rationale of the GAUSS-2 study trial: a double-blind, ezetimibe-controlled phase 3 study of the efficacy and tolerability of evolocumab (AMG 145) in subjects with hypercholesterolemia who are intolerant of statin therapy. *Clinical cardiology* 2014;37(3):131-39. doi: 10.1002/clc.22248
41. Coll B, Aragonés G, Parra S, et al. Ezetimibe effectively decreases LDL-cholesterol in HIV-infected patients. *AIDS (london, england)* 2006;20(12):1675-77. doi: 10.1097/01.aids.0000238418.43937.3b
42. Correia LC. Ezetimibe: clinical and scientific meaning of the IMPROVE-IT study. *Arquivos brasileiros de cardiologia* 2016;106(3):247-49.
43. Silbernagel G, Baumgartner I, Marz W. Ezetimibe plus a statin after acute coronary syndromes. *New England journal of medicine* 2015;373(15):1473.

44. Davidson MH, Ballantyne CM, Kerzner B, et al. Efficacy and safety of ezetimibe coadministered with statins: randomised, placebo-controlled, blinded experience in 2382 patients with primary hypercholesterolemia. *International journal of clinical practice* 2004;58(8):746-55. doi: 10.1111/j.1368-5031.2004.00289.x
45. Davidson MH, Voogt J, Luchoomun J, et al. Inhibition of intestinal cholesterol absorption with ezetimibe increases components of reverse cholesterol transport in humans. *Atherosclerosis* 2013;230(2):322-29. doi: 10.1016/j.atherosclerosis.2013.08.006
46. Dawson JA, Choke E, Loftus IM, et al. A randomised placebo-controlled double-blind trial to evaluate lipid-lowering pharmacotherapy on proteolysis and inflammation in abdominal aortic aneurysms. *European journal of vascular and endovascular surgery* 2011;41(1):28-35. doi: 10.1016/j.ejvs.2010.08.023
47. Denke M, Pearson T, McBride P, et al. Ezetimibe added to ongoing statin therapy improves LDL-C goal attainment and lipid profile in patients with diabetes or metabolic syndrome. *Diabetes & vascular disease research* 2006;3(2):93-102. doi: 10.3132/dvdr.2006.020
48. Drazen JM, Jarcho JA, Morrissey S, et al. Cholesterol lowering and ezetimibe. *New england journal of medicine* 2008;358(14):1507-08.
49. Dufour R, Bergeron J, Gaudet D, et al. Open-label therapy with alirocumab in patients with heterozygous familial hypercholesterolemia: results from three years of treatment. *International journal of cardiology* 2017;228:754-60. doi: 10.1016/j.ijcard.2016.11.046
50. Singh JS, Struthers AD, Lang CC. Ezetimibe plus a statin after acute coronary syndromes. *New England journal of medicine* 2015;373(15):1476.
51. Dujovne CA, Suresh R, McCrary Sisk C, et al. Safety and efficacy of ezetimibe monotherapy in 1624 primary hypercholesterolaemic patients for up to 2 years. *International journal of clinical practice* 2008;62(9):1332-36. doi: 10.1111/j.1742-1241.2008.01798.x
52. El-Tamalawy MM, Ibrahim OM, Hassan TM, et al. Effect of Combination Therapy of Ezetimibe and Atorvastatin on Remnant Lipoprotein Versus Double Atorvastatin Dose in Egyptian Diabetic Patients. *Journal of clinical pharmacology* 2018;58(1):34-41. doi: 10.1002/jcph.976
53. Feldman T, Koren M, Insull W, et al. Treatment of high-risk patients with ezetimibe plus simvastatin co-administration versus simvastatin alone to attain National Cholesterol Education Program Adult Treatment Panel III low-density lipoprotein cholesterol goals. *American journal of cardiology* 2004;93(12):1481-86. doi: 10.1016/j.amjcard.2004.02.059
54. Fonseca FAH, Izar MC, Maugeri IML, et al. Effects of four antiplatelet/statin combined strategies on immune and inflammatory responses in patients with acute myocardial infarction undergoing pharmacoinvasive strategy: Design and rationale of the B and T Types of Lymphocytes Evaluation in Acute Myocardial Infarction

- (BATTLE-AMI) study: Study protocol for a randomized controlled trial. *Trials* 2017;18(1) doi: <http://dx.doi.org/10.1186/s13063-017-2361-1>
55. Gagné C, Bays HE, Weiss SR, et al. Efficacy and safety of ezetimibe added to ongoing statin therapy for treatment of patients with primary hypercholesterolemia. *American journal of cardiology* 2002;90(10):1084-91. doi: 10.1016/s0002-9149(02)02774-1
56. Cruz-Fernández JM, Bedarida GV, Adgey J, et al. Efficacy and safety of ezetimibe co-administered with ongoing atorvastatin therapy in achieving low-density lipoprotein goal in patients with hypercholesterolemia and coronary heart disease. *International journal of clinical practice* 2005;59(6):619-27. doi: 10.1111/j.1368-5031.2005.00565.x
57. Dawson J, Choke E, Cockerill G, et al. A randomized placebo-controlled double-blind trial to evaluate ezetimibe combination therapy on abdominal aortic aneurysm wall proteolysis and inflammation. *The vascular society of great britain & ireland yearbook, 2007* 2007:91.
58. Garcia MM, Varela CG, Silva PF, et al. Endothelial Effect of Statin Therapy at a High Dose Versus Low Dose Associated with Ezetimibe. *Arquivos brasileiros de cardiologia* 2016;106(4):279-88. doi: 10.5935/abc.20160048
59. Kastelein JJP, Bots ML. Statin Therapy with Ezetimibe or Niacin in High-Risk Patients. *New england journal of medicine* 2009;361(22):2180-83.
60. Koh KK, Oh PC, Sakuma I, et al. Vascular and metabolic effects of ezetimibe combined with simvastatin in patients with hypercholesterolemia. *International journal of cardiology* 2015;199:126-31. doi: 10.1016/j.ijcard.2015.07.016
61. Kovarnik T, Chen Z, Wahle A, et al. Pathologic Intimal Thickening Plaque Phenotype: not as Innocent as Previously Thought. A Serial 3D Intravascular Ultrasound Virtual Histology Study. *Revista espanola de cardiologia (english ed)* 2017;70(1):25-33. doi: 10.1016/j.rec.2016.04.058
62. Lattouf C, Jimenez JJ, Tosti A, et al. Treatment of alopecia areata with simvastatin/ezetimibe. *Journal of the american academy of dermatology* 2015;72(2):359-61. doi: 10.1016/j.jaad.2014.11.006
63. Le NA, Tomassini JE, Tershakovec AM, et al. Effect of switching from statin monotherapy to ezetimibe/simvastatin combination therapy compared with other intensified lipid-lowering strategies on lipoprotein subclasses in diabetic patients with symptomatic cardiovascular disease. *Journal of the American Heart Association* 2015;4(10) doi: <http://dx.doi.org/10.1161/JAHA.114.001675>
64. Olijhoek JK, Hajer GR, Graaf YVD, et al. The effects of low-dose simvastatin and ezetimibe compared to high-dose simvastatin alone on post-fat load endothelial function in patients with metabolic syndrome: A randomized double-blind crossover trial. *Journal of Cardiovascular Pharmacology* 2008;52(2):145-50. doi: <http://dx.doi.org/10.1097/FJC.0b013e31817ffe76>
65. Oswald S, Nassif A, Modest C, et al. Pharmacokinetic and pharmacodynamic interactions between the immunosuppressant sirolimus and the lipid-lowering drug

- ezetimibe in healthy volunteers. *Clinical pharmacology and therapeutics* 2010;87(6):663-67. doi: 10.1038/clpt.2009.266
66. Oswald S, Nassif A, Modess C, et al. Drug interactions between the immunosuppressant tacrolimus and the cholesterol absorption inhibitor ezetimibe in healthy volunteers. *Clinical pharmacology and therapeutics* 2011;89(4):524-28. doi: 10.1038/clpt.2011.4
67. Palmer JL, Kunihitlu A, Costantini A, et al. Pharmacokinetic bioequivalence crossover study of branded generic and innovator formulations of the cholesterol lowering agent ezetimibe. *Clinical pharmacology in drug development* 2014;3(3):242-48. doi: 10.1002/cpdd.80
68. Nunes JP. Ezetimibe plus a statin after acute coronary syndromes. *New England journal of medicine* 2015;373(15):1475.
69. Pearson TA, Denke MA, McBride PE, et al. A community-based, randomized trial of ezetimibe added to statin therapy to attain NCEP ATP III goals for LDL cholesterol in hypercholesterolemic patients: the ezetimibe add-on to statin for effectiveness (EASE) trial. *Mayo clinic proceedings* 2005;80(5):587-95. doi: 10.4065/80.5.587
70. Perez De Isla L, Alonso R, Watts GF, et al. Attainment of LDL-cholesterol treatment goals in patients with familial hypercholesterolemia: 5-year SAFEHEART registry follow-up. *Journal of the american college of cardiology* 2016;67(11):1278-85. doi: 10.1016/j.jacc.2016.01.008
71. Raal FJ, Hovingh GK, Blom D, et al. Long-term treatment with evolocumab added to conventional drug therapy, with or without apheresis, in patients with homozygous familial hypercholesterolaemia: an interim subset analysis of the open-label TAUSSIG study. *The lancet diabetes and endocrinology* 2017;(no pagination) doi: 10.1016/S2213-8587%2817%2930044-X
72. Rey J, Poitiers F, Paehler T, et al. Relationship Between Low-Density Lipoprotein Cholesterol, Free Proprotein Convertase Subtilisin/Kexin Type 9, and Alirocumab Levels After Different Lipid-Lowering Strategies. *Journal of the american heart association* 2016;5(6) doi: 10.1161/JAHA.116.003323
73. Egom EE. Ezetimibe plus a statin after acute coronary syndromes. *New England journal of medicine* 2015;373(15):1474.
74. Roeters van Lennep HW, Liem AH, Dunselman PH, et al. The efficacy of statin monotherapy uptitration versus switching to ezetimibe/simvastatin: results of the EASEGO study. *Current medical research and opinion* 2008;24(3):685-94. doi: 10.1185/030079908X273273
75. Rosen JB, Jimenez JG, Pirags V, et al. A comparison of efficacy and safety of an ezetimibe/simvastatin combination compared with other intensified lipid-lowering treatment strategies in diabetic patients with symptomatic cardiovascular disease. *Diabetes & vascular disease research* 2013;10(3):277-86. doi: 10.1177/1479164112465212
76. Ruggenti P, Cattaneo D, Rota S, et al. Effects of combined ezetimibe and simvastatin therapy as compared with simvastatin alone in patients with type 2

- diabetes: a prospective randomized double-blind clinical trial. *Diabetes care* 2010;33(9):1954-56. doi: 10.2337/dc10-0320
77. Sarigianni M, Katsiki N, Mikhailidis DP. Effects of combined ezetimibe and simvastatin therapy as compared with simvastatin alone in patients with type 2 diabetes: a prospective randomized double-blind clinical trial. *Diabetes care* 2010;33(10):e132. doi: 10.2337/dc10-1250
78. Couture P, Durand M, Laskine M. Ezetimibe plus a statin after acute coronary syndromes. *New England journal of medicine* 2015;373(15):1473-74.
79. Soulele K, Karalis V. Development of a joint population pharmacokinetic model of ezetimibe and its conjugated metabolite. *European journal of pharmaceutical sciences* 2019;128:18-26. doi: 10.1016/j.ejps.2018.11.018
80. Strony J, Hoffman R, Hanson M, et al. Tolerability and effects on lipids of ezetimibe coadministered with pravastatin or simvastatin for twelve months: results from two open-label extension studies in hypercholesterolemic patients. *Clinical therapeutics* 2008;30(12):2280-97. doi: 10.1016/j.clinthera.2008.12.008
81. Thompson PD, MacDougall DE, Newton RS, et al. Treatment with ETC-1002 alone and in combination with ezetimibe lowers LDL cholesterol in hypercholesterolemic patients with or without statin intolerance. *Journal of clinical lipidology* 2016;10(3):556-67. doi: 10.1016/j.jacl.2015.12.025
82. Toth PP. Ezetimibe provides incremental reduction in risk for cardiovascular events and need for revascularisation following an acute coronary syndrome. *Evidence-based medicine* 2015;20(5):176.
83. Tziomalos K, Athyros VG. Priority Paper Evaluation: are antibodies against PCSK9 the statins of the 21st century? *Clinical lipidology* 2014;9(2):141-44. doi: 10.2217/clp.14.1
84. Villa J, Pratley RE. Ezetimibe/simvastatin or atorvastatin for the treatment of hypercholesterolemia in patients with the metabolic syndrome: the VYMET study. *Current diabetes reports* 2010;10(3):173-75.
85. Weingartner O, Bohm M, Laufs U. Letter by Weingärtner et al regarding article, "combined effects of ezetimibe and phytosterols on cholesterol metabolism: a randomized, controlled feeding study in humans". *Circulation* 2012;125(10):e456. doi: 10.1161/CIRCULATIONAHA.111.060806
86. Westerweel PE, Visseren FL, Hajer GR, et al. Endothelial progenitor cell levels in obese men with the metabolic syndrome and the effect of simvastatin monotherapy vs. simvastatin/ezetimibe combination therapy. *European heart journal* 2008;29(22):2808-17. doi: 10.1093/eurheartj/ehn431
87. Wohl DA, Waters D, Simpson RJ, et al. Ezetimibe alone reduces low-density lipoprotein cholesterol in HIV-infected patients receiving combination antiretroviral therapy. *Clinical infectious diseases* 2008;47(8):1105-08. doi: 10.1086/592116
88. Wu NQ, Guo YL, Zhu CG, et al. Comparison of statin plus ezetimibe with double-dose statin on lipid profiles and inflammation markers. *Lipids in health and disease* 2018;17(1):265. doi: 10.1186/s12944-018-0909-z

89. Yu RZ, Geary RS, Flaim JD, et al. Lack of pharmacokinetic interaction of mipomersen sodium (ISIS 301012), a 2'-O-methoxyethyl modified antisense oligonucleotide targeting apolipoprotein B-100 messenger RNA, with simvastatin and ezetimibe. *Clinical pharmacokinetics* 2009;48(1):39-50. doi: 10.2165/0003088-200948010-00003
90. Zema MJ. Colesevelam HCl and ezetimibe combination therapy provides effective lipid-lowering in difficult-to-treat patients with hypercholesterolemia. *American journal of therapeutics* 2005;12(4):306-10. doi: 10.1097/01.mjt.0000155109.69831.a3
91. Yu RZ, Geary RS, Flaim JD, et al. Lack of pharmacokinetic interaction of mipomersen sodium (ISIS 301012), a 2'-O-methoxyethyl modified antisense oligonucleotide targeting apolipoprotein B-100 messenger RNA, with simvastatin and ezetimibe. *Clinical Pharmacokinetics* 2009;48(1):39-50. doi: <http://dx.doi.org/10.2165/0003088-200948010-00003>
92. Yokote K, Suzuki A, Li Y, et al. Pharmacokinetics and exploratory efficacy biomarkers of bococizumab, an anti-PCSK9 monoclonal antibody, in hypercholesterolemic Japanese subjects *International journal of clinical pharmacology and therapeutics* 2019;57(12):575-89. doi: 10.5414/CP203418
93. Yang LPH, Keating GM. Fenofibric acid: In combination therapy in the treatment of mixed dyslipidemia. *American Journal of Cardiovascular Drugs* 2009;9(6):401-09. doi: <http://dx.doi.org/10.2165/11203920-000000000-00000>
94. Wu NQ, Guo YL, Zhu CG, et al. Comparison of statin plus ezetimibe with double-dose statin on lipid profiles and inflammation markers 11 Medical and Health Sciences 1103 Clinical Sciences. *Lipids in Health and Disease* 2018;17(1) doi: <http://dx.doi.org/10.1186/s12944-018-0909-z>
95. Weingartner O, Sijbrands E, Lutjohann D. Letter by Weingartner et al Regarding Article, "ezetimibe Lipid-Lowering Trial on Prevention of Atherosclerotic Cardiovascular Disease in 75 or Older (EWTOPIA 75): A Randomized, Controlled Trial". *Circulation* 2020:E65-E66. doi: <http://dx.doi.org/10.1161/CIRCULATIONAHA.119.043726>
96. Watson KE, Fonarow GC. Closing the remaining evidence gap randomized controlled trial data to support statin therapy for low-Density lipoprotein  $\geq 190$  mg/dL. *Circulation* 2017;136(20):1892-94. doi: <http://dx.doi.org/10.1161/CIRCULATIONAHA.117.030989>
97. Vogt A, Parhofer KG. The potential of mipomersen, an ApoB synthesis inhibitor, to reduce necessity for LDL-apheresis in patients with heterozygous familial hypercholesterolemia and coronary artery disease. *Expert Opinion on Pharmacotherapy* 2013;14(6):691-97. doi: <http://dx.doi.org/10.1517/14656566.2013.779253>
98. Virani SS, Kennedy KF, Akeroyd JM, et al. Variation in Lipid-Lowering Therapy Use in Patients With Low-Density Lipoprotein Cholesterol  $\geq 190$  mg/dL: Insights From the National Cardiovascular Data Registry-Practice Innovation and Clinical



- Excellence Registry. *Circulation* 2018;Cardiovascular quality and outcomes. 11(5):e004652. doi: <http://dx.doi.org/10.1161/CIRCOUTCOMES.118.004652>
99. Viney NJ, Yeang C, Yang X, et al. Relationship between "LDL-C" estimated true LDL-C, apolipoprotein B-100, and PCSK9 levels following lipoprotein(a) lowering with an antisense oligonucleotide. *Journal of Clinical Lipidology* 2018;12(3):702-10. doi: <http://dx.doi.org/10.1016/j.jacl.2018.02.014>
100. Tommaso CL. One year perspective on COURAGE. *Catheterization and Cardiovascular Interventions* 2008;72(3):426-29. doi: <http://dx.doi.org/10.1002/ccd.21642>
101. Stuart B, Samantha Shoemaker J, Dai M, et al. Regions with higher medicare Part D spending show better drug adherence, but not lower medicare costs for two diseases. *Health Affairs* 2013;32(1):120-26. doi: <http://dx.doi.org/10.1377/hlthaff.2011.0727>
102. Shigematsu E, Yamakawa T, Taguri M, et al. Efficacy of ezetimibe is associated with gender and baseline lipid levels in patients with type 2 diabetes. *Journal of Atherosclerosis and Thrombosis* 2012;19(9):846-53. doi: <http://dx.doi.org/10.5551/jat.12799>
103. Sacks FM. Low-density lipoprotein lowering therapy: An analysis of the options. *Journal of the American College of Cardiology* 2002;40(12):2135-38. doi: <http://dx.doi.org/10.1016/S0735-1097%2802%2902609-8>
104. Rossebo AB, Pedersen TR, Boman K, et al. Intensive lipid lowering with simvastatin and ezetimibe in aortic stenosis. *New England Journal of Medicine* 2008;359(13):1343-56. doi: <https://dx.doi.org/10.1056/NEJMoa0804602>
105. Rodes-Cabau J, Tardif JC, Cossette M, et al. Acute Effects of Statin Therapy on Coronary Atherosclerosis Following an Acute Coronary Syndrome. *American Journal of Cardiology* 2009;104(6):750-57. doi: <http://dx.doi.org/10.1016/j.amjcard.2009.05.009>
106. Ray KK, Stoekenbroek RM, Kallend D, et al. Effect of 1 or 2 Doses of Inclisiran on Low-Density Lipoprotein Cholesterol Levels: One-Year Follow-up of the ORION-1 Randomized Clinical Trial. *JAMA Cardiology* 2019;4(11):1067-75. doi: <http://dx.doi.org/10.1001/jamacardio.2019.3502>
107. Phillips PS. Balancing randomized trials with anecdote. *Annals of Internal Medicine* 2009;150(12):885-86. doi: <http://dx.doi.org/10.7326/0003-4819-150-12-200906160-00014>
108. Pesaro AE, Serrano CV, Fernandes JL, et al. Pleiotropic effects of ezetimibe/simvastatin vs. high dose simvastatin. *International journal of cardiology* 2012;158(3):400-04. doi: 10.1016/j.ijcard.2011.01.062
109. Panza GA, Taylor BA, Dada MR, et al. Changes in muscle strength in individuals with statin-induced myopathy: A summary of 3 investigations. *Journal of Clinical Lipidology* 2015;9(3):351-56. doi: <http://dx.doi.org/10.1016/j.jacl.2015.01.004>

110. Olijhoek JK, Hajer GR, van der Graaf Y, et al. The effects of low-dose simvastatin and ezetimibe compared to high-dose simvastatin alone on post-fat load endothelial function in patients with metabolic syndrome: a randomized double-blind crossover trial. *Journal of cardiovascular pharmacology* 2008;52(2):145-50. doi: 10.1097/FJC.0b013e31817ffe76
111. O'Keefe JH, Carter MD, Lavie CJ, et al. The gravity of JUPITER (justification for the use of statins in primary prevention: An Intervention Trial Evaluating Rosuvastatin). *Postgraduate Medicine* 2009;121(3):113-18. doi: <http://dx.doi.org/10.3810/pgm.2009.05.2010>
112. Neil A, Humphries SE. Statins and familial hypercholesterolaemia. *BMJ (Online)* 2009;338(7688):185-86. doi: <http://dx.doi.org/10.1136/bmj.a3041>
113. Miyazaki-Anzai S, Masuda M, Demos-Davies KM, et al. Endoplasmic reticulum stress effector CCAAT/enhancer-binding protein homologous protein (CHOP) regulates chronic kidney disease-induced vascular calcification. *Journal of the American Heart Association* 2014;3(3) doi: <http://dx.doi.org/10.1161/JAHA.114.000949>
114. McPherson R, Hegele RA. Rescued by randomization (Clinical and Mendelian). *Arteriosclerosis, Thrombosis, and Vascular Biology* 2015;35(3):e13-e15. doi: <http://dx.doi.org/10.1161/ATVBAHA.114.305012>
115. McKenney J, Ballantyne CM, Feldman TA, et al. LDL-C goal attainment with ezetimibe plus simvastatin coadministration vs atorvastatin or simvastatin monotherapy in patients at high risk of CHD. *Medgenmed : medscape general medicine* 2005;7(3):3.
116. Maron DJ, Spertus JA, Mancini GBJ, et al. Impact of an Initial Strategy of Medical Therapy Without Percutaneous Coronary Intervention in High-Risk Patients From the Clinical Outcomes Utilizing Revascularization and Aggressive DruG Evaluation (COURAGE) Trial. *American Journal of Cardiology* 2009;104(8):1055-62. doi: <http://dx.doi.org/10.1016/j.amjcard.2009.05.056>
117. Lin M, Cui H, Chen W, et al. Longitudinal assessment of carotid plaque texture in three-dimensional ultrasound images based on semi-supervised graph-based dimensionality reduction and feature selection. *Computers in Biology and Medicine* 2020;116 (no pagination) doi: <http://dx.doi.org/10.1016/j.compbiomed.2019.103586>
118. Le NA, Tomassini JE, Tershakovec AM, et al. Effect of Switching From Statin Monotherapy to Ezetimibe/Simvastatin Combination Therapy Compared With Other Intensified Lipid-Lowering Strategies on Lipoprotein Subclasses in Diabetic Patients With Symptomatic Cardiovascular Disease. *Journal of the american heart association* 2015;4(10):e001675. doi: 10.1161/JAHA.114.001675
119. Kosoglou T, Meyer I, Veltri EP, et al. Pharmacodynamic interaction between the new selective cholesterol absorption inhibitor ezetimibe and simvastatin. *British journal of clinical pharmacology* 2002;54(3):309-19. doi: 10.1046/j.1365-2125.2002.01633.x

120. Kimura G, Kasahara M, Ueshima K, et al. Effects of atorvastatin on renal function in patients with dyslipidemia and chronic kidney disease: assessment of clinical usefulness in CKD patients with atorvastatin (ASUCA) trial. *Clinical and Experimental Nephrology* 2017;21(3):417-24. doi: <http://dx.doi.org/10.1007/s10157-016-1304-6>
121. Kim KJ, Kim SH, Yoon YW, et al. Effect of fixed-dose combinations of ezetimibe plus rosuvastatin in patients with primary hypercholesterolemia: mRS-ROZE (Multicenter Randomized Study of ROsuvastatin and eZetimibe). *Cardiovascular therapeutics* 2016;34(5):371-82. doi: 10.1111/1755-5922.12213
122. Jakulj L, Trip MD, Sudhop T, et al. Inhibition of cholesterol absorption by the combination of dietary plant sterols and ezetimibe: effects on plasma lipid levels. *Journal of lipid research* 2005;46(12):2692-98. doi: 10.1194/jlr.M500260-JLR200
123. Hermans MP, Ahn SA, Rousseau MF. Crossing family histories of diabetes and cardiovascular disease leads to unexpected outcomes in diabetic offspring. *Journal of Diabetes* 2019;11(4):301-08. doi: <http://dx.doi.org/10.1111/1753-0407.12840>
124. Harrison SA, Rossaro L, Hu KQ, et al. Serum cholesterol and statin use predict virological response to peginterferon and ribavirin therapy. *Hepatology* 2010;52(3):864-74. doi: <http://dx.doi.org/10.1002/hep.23787>
125. Hamilton-Craig IR. After ENHANCE: The cholesterol hypothesis is alive and well. *Medical Journal of Australia* 2008;189(6):303-04.
126. Ginsberg HN, Bonds DE, Lovato LC, et al. Evolution of the Lipid Trial Protocol of the Action to Control Cardiovascular Risk in Diabetes (ACCORD) Trial. *American Journal of Cardiology* 2007;99(12 SUPPL.):S56-S67. doi: <http://dx.doi.org/10.1016/j.amjcard.2007.03.024>
127. Enajat M, Teerenstra S, Van Kuilenburg JT, et al. Safety of the combination of intensive cholesterol-lowering therapy with oral anticoagulation medication in elderly patients with atrial fibrillation: A randomized, double-blind, placebo-controlled study. *Drugs and Aging* 2009;26(7):585-93. doi: <http://dx.doi.org/10.2165/10558450-000000000-00000>
128. Dufour R, Hovingh GK, Guyton JR, et al. Individualized low-density lipoprotein cholesterol reduction with alirocumab titration strategy in heterozygous familial hypercholesterolemia: Results from an open-label extension of the ODYSSEY LONG TERM trial. *Journal of Clinical Lipidology* 2019;13(1):138-47. doi: <http://dx.doi.org/10.1016/j.jacl.2018.11.007>
129. Dorais M, Chirovsky D, Ambegaonkar B, et al. Utilization patterns of extended-release niacin in Canada: Analysis of an administrative claims database. *Canadian Journal of Cardiology* 2010;26(7):e229-e35. doi: [http://dx.doi.org/10.1016/S0828-282X\(10\)70413-X](http://dx.doi.org/10.1016/S0828-282X(10)70413-X)
130. Davies GM, Cook JR, Erbey J, et al. Projected coronary heart disease risk benefit with ezetimibe. *Atherosclerosis* 2005;179(2):375-78. doi: <http://dx.doi.org/10.1016/j.atherosclerosis.2004.10.030>

131. Conti CR. Expanding the understanding of the treatment of chronic angina: A 21st century approach - Part II. *Clinical Cardiology* 2008;31(7):295-96. doi: <http://dx.doi.org/10.1002/clc.20406>
132. Ansquer JC, Bekaert I, Guy M, et al. Efficacy and safety of coadministration of fenofibrate and ezetimibe compared with each as monotherapy in patients with type IIb dyslipidemia and features of the metabolic syndrome: a prospective, randomized, double-blind, three-parallel arm, multicenter, comparative study. *American journal of cardiovascular drugs* 2009;9(2):91-101. doi: 10.1007/bf03256580
133. Almquist T, Jacobson SH, Lins PE, et al. Effects of lipid-lowering treatment on platelet reactivity and plateletleukocyte aggregation in diabetic patients without and with chronic kidney disease: A randomized trial. *Nephrology Dialysis Transplantation* 2012;27(9):3540-46. doi: <http://dx.doi.org/10.1093/ndt/gfs183>
134. Alexanderson E, Garcia-Rojas L, Jimenez M, et al. Effect of ezetimibe-simvastatine over endothelial dysfunction in dyslipidemic patients: Assessment by <sup>13</sup>N-ammonia positron emission tomography. *Journal of Nuclear Cardiology* 2010;17(6):1015-22. doi: <http://dx.doi.org/10.1007/s12350-010-9273-8>
135. Zou X, Si QJ. Is combined lipid-regulating therapy safe and feasible for the very old patients with mixed dyslipidemia? *Journal of Geriatric Cardiology* 2013;10(4):349-54. doi: <https://dx.doi.org/10.3969/j.issn.1671-5411.2013.04.014>
136. Zimlichman E, Szyper-Kravitz M, Katz U, et al. Intensive lipid-lowering therapy: obvious benefits, possible risks. *Isr Med Assoc J* 2006;8(12):890-1.
137. Yoneda M, Fujita K, Imajo K, et al. Induction of microsomal triglyceride transfer protein expression is a candidate mechanism by which ezetimibe therapy might exert beneficial effects in patients with nonalcoholic steatohepatitis. *J Gastroenterol* 2011;46(3):415-6; author reply 17. doi: <https://dx.doi.org/10.1007/s00535-010-0356-8>
138. Wu Y, Xu MJ, Cao Z, et al. Heterozygous Ldlr-Deficient Hamster as a Model to Evaluate the Efficacy of PCSK9 Antibody in Hyperlipidemia and Atherosclerosis. *International Journal of Molecular Sciences* 2019;20(23):26. doi: <https://dx.doi.org/10.3390/ijms20235936>
139. Wu NQ, Guo YL, Zhu CG, et al. Rapid Regression of Multiple-Site Xanthomas in an Adult With Homozygous Familial Hypercholesterolemia by Triple Lipid-Lowering Drugs. *American Journal of Therapeutics* 2019;26(6):e775-e77. doi: <https://dx.doi.org/10.1097/MJT.0000000000000868>
140. Toth PP, Catapano AL, Farnier M, et al. Effect on Fasting Serum Glucose Levels of Adding Ezetimibe to Statins in Patients With Nondiabetic Hypercholesterolemia. *American Journal of Cardiology* 2016;118(12):1812-20. doi: <https://dx.doi.org/10.1016/j.amjcard.2016.08.071>
141. Szabo RP, Varga I, Balla J, et al. Cardiovascular Screening and Management Among Kidney Transplant Candidates in Hungary. *Transplantation Proceedings* 2015;47(7):2192-5. doi: <https://dx.doi.org/10.1016/j.transproceed.2015.07.018>
142. Stroup JS, Kane MP, Busch RS. The antilipidemic effects of ezetimibe in patients with diabetes. *Diabetes Care* 2003;26(10):2958-9.

143. Stefanutti C, D'Alessandri G, Russi G, et al. Treatment of symptomatic HyperLp(a) lipoproteinemia with LDL-apheresis: a multicentre study. *Atherosclerosis Supplements* 2009;10(5):89-94. doi: [https://dx.doi.org/10.1016/S1567-5688\(09\)71819-7](https://dx.doi.org/10.1016/S1567-5688(09)71819-7)
144. Stebbing J, Asghar AK, Holmes P, et al. Use of ezetimibe during HIV infection. *Journal of Antimicrobial Chemotherapy* 2009;63(1):218-20. doi: <https://dx.doi.org/10.1093/jac/dkn440>
145. Spence JD. Asymptomatic carotid stenosis. *Circulation* 2013;127(6):739-42. doi: <https://dx.doi.org/10.1161/CIRCULATIONAHA.112.153734>
146. Spence JD. Letter to the Editor: The ezetimibe 'controversy' is a misunderstanding. *Expert Opinion on Pharmacotherapy* 2012;13(17):2579-80; author reply 80. doi: <https://dx.doi.org/10.1517/14712598.2012.727618>
147. Spence JD. Is carotid intima-media thickness a reliable clinical predictor? *Mayo Clinic Proceedings* 2008;83(11):1299-300; author reply 300-1. doi: <https://dx.doi.org/10.4065/83.11.1299>
148. Soza A. Hepatitis C RNA clearance after treatment with ezetimibe. *Liver Int* 2012;32(8):1323-4. doi: <https://dx.doi.org/10.1111/j.1478-3231.2012.02848.x>
149. SoRelle R. New lipid-lowering combo proves successful. *Circulation* 2003;107(19):e9043-4.
150. Smith D. Making sense of ENHANCE: ezetimibe (Zetia) lowers LDL cholesterol but doesn't decrease carotid intima-media thickness. *Mt Sinai J Med* 2008;75(2):143-7. doi: <https://dx.doi.org/10.1002/msj.20031>
151. Sijbrands EJ. Inhibition of PCSK9 in familial hypercholesterolaemia. *Lancet* 2012;380(9836):6-7. doi: [https://dx.doi.org/10.1016/S0140-6736\(12\)60814-9](https://dx.doi.org/10.1016/S0140-6736(12)60814-9)
152. Settegren M, Ryden L, Pernow J. Letter by Settegren et al regarding article, "Evidence for statin pleiotropy in humans: differential effects of statins and ezetimibe on rho-associated coiled-coil containing protein kinase activity, endothelial function, and inflammation". *Circulation* 2009;120(9):e68; author reply e69-70. doi: <https://dx.doi.org/10.1161/CIRCULATIONAHA.109.854315>
153. Saougos VG, Tambaki AP, Kalogirou M, et al. Differential effect of hypolipidemic drugs on lipoprotein-associated phospholipase A2. *Arterioscler Thromb Vasc Biol* 2007;27(10):2236-43.
154. Roberts WC. Two more drugs for dyslipidemia. *American Journal of Cardiology* 2004;93(6):809-11.
155. Rivers SM, Kane MP, Busch RS, et al. Colesevelam hydrochloride-ezetimibe combination lipid-lowering therapy in patients with diabetes or metabolic syndrome and a history of statin intolerance. *Endocrine Practice* 2007;13(1):11-6.
156. Pourafkari L, Mahdavi-Fard A, Nader ND. Effects of Statins on the Development of Cataract-the Long Standing Debate. *American Journal of Cardiology* 2016;117(3):489-90. doi: <https://dx.doi.org/10.1016/j.amjcard.2015.11.053>

157. Pisciotta L, Fasano T, Bellocchio A, et al. Effect of ezetimibe coadministered with statins in genotype-confirmed heterozygous FH patients. *Atherosclerosis* 2007;194(2):e116-22.
158. Pesaro AE, Granger CB, Lopes RD. Reduction of ischemic events in Improved Reduction of Outcomes: Vytorin Efficacy International Trial: Intensive cholesterol lowering or ezetimibe antithrombotic effects? *American Heart Journal* 2016;172:42-4. doi: <https://dx.doi.org/10.1016/j.ahj.2015.11.001>
159. Pauriah M, Struthers AD, Lang CC. Biomarkers and surrogate endpoints in cardiovascular therapeutics research: under scrutiny following results of the ENHANCE Study. *Cardiovascular therapeutics* 2008;26(2):85-8. doi: <https://dx.doi.org/10.1111/j.1527-3466.2008.00048.x>
160. Paraskevas KI, Mikhailidis DP, Giannoukas AD. Atorvastatin in combination with ezetimibe and carotid atherosclerosis. *Genet Mol Res* 2014;13(3):4805-7. doi: <https://dx.doi.org/10.4238/2014.July.2.10>
161. Okada K, Kimura K, Iwahashi N, et al. Clinical usefulness of additional treatment with ezetimibe in patients with coronary artery disease on statin therapy. - From the viewpoint of cholesterol metabolism. *Circulation journal* 2011;75(10):2496-504. doi: 10.1253/circj.cj-11-0391
162. Moro J, Almenar L, Martinez-Dolz L, et al. Ezetimibe in heart transplantation: initial experience. *Transplantation Proceedings* 2007;39(7):2389-92.
163. Monrroy-Bravo H, Angulo J, Pino K, et al. Effect of ezetimibe in HCV viral load after liver transplantation. *Ann Hepatol* 2016;15(5):803-5. doi: <https://dx.doi.org/10.5604/16652681.1212623>
164. Mignarri A, Carecchio M, Del Puppo M, et al. SPG5 siblings with different phenotypes showing reduction of 27-hydroxycholesterol after simvastatin-ezetimibe treatment. *J Neurol Sci* 2017;383:39-41. doi: <https://dx.doi.org/10.1016/j.jns.2017.10.022>
165. Mascitelli L, Goldstein MR. Evaluating Statin Versus Statin Plus Ezetimibe for Coronary Plaque Regression. *Journal of the American College of Cardiology* 2015;66(25):2916. doi: <https://dx.doi.org/10.1016/j.jacc.2015.08.1131>
166. Masana L, Pedro-Botet J, Civeira F. IMPROVE-IT clinical implications. Should the "high-intensity cholesterol-lowering therapy" strategy replace the "high-intensity statin therapy"? *Atherosclerosis* 2015;240(1):161-2. doi: <https://dx.doi.org/10.1016/j.atherosclerosis.2015.03.002>
167. Lopez V, Gutierrez C, Gutierrez E, et al. Treatment with ezetimibe in kidney transplant recipients with uncontrolled dyslipidemia. *Transplantation Proceedings* 2008;40(9):2925-6. doi: <https://dx.doi.org/10.1016/j.transproceed.2008.09.046>
168. Loi C, Starace M, Piraccini BM. Alopecia areata (AA) and treatment with simvastatin/ezetimibe: Experience of 20 patients. *Journal of the American Academy of Dermatology* 2016;74(5):e99-e100. doi: <https://dx.doi.org/10.1016/j.jaad.2015.09.071>

169. Li L, Zhang M, Su F, et al. Combination therapy analysis of ezetimibe and statins in Chinese patients with acute coronary syndrome and type 2 diabetes. *Lipids health dis* 2015;14:10. doi: <https://dx.doi.org/10.1186/s12944-015-0004-7>
170. Krysiak R, Szkrobka W, Okopien B. The Effect of Ezetimibe/Statin Combination and High-Dose Statin Therapy on Thyroid Autoimmunity in Women with Hashimoto's Thyroiditis and Cardiovascular Disease: A Pilot Study. *Exp Clin Endocrinol Diabetes* 2016;124(9):577-81.
171. Kostapanos MS, Elisaf MS, Mikhailidis DP. Ezetimibe - a new approach in hypercholesterolemia management. *Pharmacol Rep* 2012;64(4):997-8.
172. Koren MJ, Lundqvist P, Bolognese M, et al. Anti-PCSK9 monotherapy for hypercholesterolemia: the MENDEL-2 randomized, controlled phase III clinical trial of evolocumab. *Journal of the American College of Cardiology* 2014;63(23):2531-40. doi: 10.1016/j.jacc.2014.03.018
173. Koh KK. Intriguing Off-Target Effects of Ezetimibe. *Journal of the American College of Cardiology* 2015;66(24):2808. doi: <https://dx.doi.org/10.1016/j.jacc.2015.08.1130>
174. Knowles JW, Howard WB, Karayan L, et al. Access to Nonstatin Lipid-Lowering Therapies in Patients at High Risk of Atherosclerotic Cardiovascular Disease. *Circulation* 2017;135(22):2204-06. doi: <https://dx.doi.org/10.1161/CIRCULATIONAHA.117.027705>
175. Kawaguchi R. Low-density lipoprotein cholesterol lowering therapy and established atherosclerosis. *Circulation Journal* 2012;76(1):49-50.
176. Avellone G, Di Garbo V, Guarnotta V, et al. Efficacy and safety of long-term ezetimibe/simvastatin treatment in patients with familial hypercholesterolemia. *International Angiology* 2010;29(6):514-24.
177. Hurley DL, Isley WL. Getting there: statin plus ezetimibe for low-density lipoprotein cholesterol goals. *Mayo Clinic Proceedings* 2005;80(5):585-6.
178. Higashiyama A, Yokoyama T, Omoto Y, et al. Flutamide-induced photoleukomelanoderma. *J Dermatol* 2016;43(9):1105-6. doi: <https://dx.doi.org/10.1111/1346-8138.13340>
179. Gonzalez Sanchidrian S, Labrador Gomez PJ, Aguilar Aguilar JC, et al. Evolocumab for the treatment of heterozygous familial hypercholesterolemia in end-stage chronic kidney disease and dialysis. *Nefrologia* 2019;39(2):218-20. doi: <https://dx.doi.org/10.1016/j.nefro.2018.09.005>
180. Ballantyne CM, Abate N, Yuan Z, et al. Dose-comparison study of the combination of ezetimibe and simvastatin (Vytorin) versus atorvastatin in patients with hypercholesterolemia: the Vytorin Versus Atorvastatin (VYVA) study. *American heart journal* 2005;149(3):464-73.
181. Fonseca HA, Izar MC, Bianco HT, et al. Ezetimibe, oxidized low density lipoprotein, Lp (a), and dyslipidemia. *J Atheroscler Thromb* 2010;17(8):888.
182. Ferreira CES, Franca CN, Izar MCO, et al. High-intensity statin monotherapy versus moderate-intensity statin plus ezetimibe therapy: effects on vascular

- biomarkers. *International journal of cardiology* 2015;180:78-79. doi: 10.1016/j.ijcard.2014.11.177
183. Feldman T, Koren M, Insull Jr W, et al. Treatment of high-risk patients with ezetimibe plus simvastatin co-administration versus simvastatin alone to attain National Cholesterol Education Program Adult Treatment Panel III Low-Density lipoprotein cholesterol goals. *American Journal of Cardiology* 2004;93(12):1481-86. doi: <http://dx.doi.org/10.1016/j.amjcard.2004.02.059>
184. Elsaies A, Lund C, Kerty E. Ptosis, diplopia and statins: an association? *Eur J Neurol* 2008;15(10):e92-3. doi: <https://dx.doi.org/10.1111/j.1468-1331.2008.02234.x>
185. Doherty E, Lumb PJ, Chik G, et al. Ezetimibe-induced hyperlipidaemia. *International Journal of Clinical Practice* 2005;Supplement.(147):3-5.
186. Di Pierro F, Bellone I, Rapacioli G, et al. Clinical role of a fixed combination of standardized Berberis aristata and Silybum marianum extracts in diabetic and hypercholesterolemic patients intolerant to statins. *Diabetes Metab Syndr Obes* 2015;8:89-96. doi: <https://dx.doi.org/10.2147/DMSO.S78877>
187. Derosa G, D'Angelo A, Franzetti IG, et al. Efficacy and safety of ezetimibe/simvastatin association on non-diabetic and diabetic patients with polygenic hypercholesterolemia or combined hyperlipidemia and previously intolerant to standard statin treatment. *J Clin Pharm Ther* 2009;34(3):267-76.
188. De Ferrari GM, Perna GP, Nicosia A, et al. Available oral lipid-lowering agents could bring most high-risk patients to target: an estimate based on the Dyslipidemia International Study II-Italy. *Journal of Cardiovascular Medicine* 2018;19(9):485-90. doi: <https://dx.doi.org/10.2459/JCM.0000000000000680>
189. Cerda A, Rodrigues AC, Alves C, et al. Modulation of adhesion molecules by cholesterol-lowering therapy in mononuclear cells from hypercholesterolemic patients. *Cardiovascular therapeutics* 2015;33(4):168-76. doi: <https://dx.doi.org/10.1111/1755-5922.12126>
190. Brown AJ. Atherosclerosis: cell biology and lipoproteins: cholesterol absorption inhibitors: gateway therapy for hypercholesterolaemia. *Current Opinion in Lipidology* 2002;13(6):701-3.
191. Bennett S, Sager P, Lipka L, et al. Consistency in efficacy and safety of ezetimibe coadministered with statins for treatment of hypercholesterolemia in women and men. *Journal of women's health* 2004;13(10):1101-07.
192. Bae J, Hong N, Lee BW, et al. Comparison of Renal Effects of Ezetimibe-Statin Combination versus Statin Monotherapy: A Propensity-Score-Matched Analysis. *J* 2020;9(3):15. doi: <https://dx.doi.org/10.3390/jcm9030798>
193. Abel T, Feher J, Dinya E, et al. Safety and efficacy of combined ezetimibe/simvastatin treatment and simvastatin monotherapy in patients with non-alcoholic fatty liver disease. *Medical Science Monitor* 2009;15(12):MS6-11.
194. Al-Shaer MH. The effects of ezetimibe on the LDL-cholesterol particle number. *Cardiovasc Drugs Ther* 2004;18(4):327-8.



195. Amarenco P, Kim JS, Labreuche J, et al. Benefit of Targeting a LDL (Low-Density Lipoprotein) Cholesterol <70 mg/dL During 5 Years After Ischemic Stroke. *Stroke* 2020;51(4):1231-39. doi: <http://dx.doi.org/10.1161/STROKEAHA.119.028718>
196. Oikawa S, Yamashita S, Nakaya N, et al. Efficacy and Safety of Long-term Coadministration of Fenofibrate and Ezetimibe in Patients with Combined Hyperlipidemia: results of the EFECTL Study. *Journal of atherosclerosis and thrombosis* 2017;24(1):77-94. doi: 10.5551/jat.35626
197. Hougaard M, Hansen HS, Thayssen P, et al. Influence of ezetimibe in addition to high-dose atorvastatin therapy on plaque composition in patients with ST-segment elevation myocardial infarction assessed by serial: intravascular ultrasound with iMap: the OCTIVUS trial. *Cardiovascular revascularization medicine* 2017;18(2):110-17. doi: 10.1016/j.carrev.2016.11.010
198. Hibi K, Sonoda S, Kawasaki M, et al. Effects of Ezetimibe-Statin Combination Therapy on Coronary Atherosclerosis in Acute Coronary Syndrome. *Circulation journal* 2018;82(3):757-66. doi: 10.1253/circj.CJ-17-0598
199. Suzuki H, Watanabe Y, Kumagai H, et al. Comparative efficacy and adverse effects of the addition of ezetimibe to statin versus statin titration in chronic kidney disease patients. *Therapeutic advances in cardiovascular disease* 2013;7(6):306-15. doi: 10.1177/1753944713513222
200. Zinellu A, Sotgia S, Loriga G, et al. Oxidative stress improvement is associated with increased levels of taurine in CKD patients undergoing lipid-lowering therapy. *Amino acids* 2012;43(4):1499-507. doi: 10.1007/s00726-012-1223-0
201. Sakuma M, Toyoda S, Hashimoto R, et al. Add-on ezetimibe treatment to low-dose statins vs medium-intensity statin monotherapy in coronary artery disease patients with poorly controlled dyslipidemia. *Hypertension Research* 2019;42(12):1923-31. doi: <http://dx.doi.org/10.1038/s41440-019-0308-5>
202. Chow D, Chen H, Glesby MJ, et al. Short-term ezetimibe is well tolerated and effective in combination with statin therapy to treat elevated LDL cholesterol in HIV-infected patients. *AIDS (london, england)* 2009;23(16):2133-41. doi: 10.1097/QAD.0b013e32833068e3
203. Drouin-Chartier JP, Tremblay AJ, Lemelin V, et al. Ezetimibe increases intestinal expression of the LDL receptor gene in dyslipidaemic men with insulin resistance. *Diabetes, obesity & metabolism* 2016;18(12):1226-35. doi: 10.1111/dom.12749
204. Ishimitsu T, Ohno E, Ueno Y, et al. Effects of atorvastatin and ezetimibe on endothelial function in dyslipidemic patients with chronic kidney disease. *Clinical and experimental nephrology* 2014;18(5):704-10. doi: 10.1007/s10157-013-0904-7
205. Kanat M, Serin E, Tunckale A, et al. A multi-center, open label, crossover designed prospective study evaluating the effects of lipid lowering treatment on steroid synthesis in patients with Type 2 diabetes (MODEST Study). *Journal of endocrinological investigation* 2009;32(10):852-56. doi: 10.1007/BF03345757
206. Koie M, Kondo Y, Santou T, et al. Effects of non-statin antilipemic drugs on vascular endothelial function in patients with type 2 diabetes with

- hypercholesterolemia. *Diabetology international* 2013;5(3):175-80. doi: 10.1007/s13340-013-0152-9
207. Lakoski SG, Xu F, Vega GL, et al. Indices of cholesterol metabolism and relative responsiveness to ezetimibe and simvastatin. *Journal of clinical endocrinology and metabolism* 2010;95(2):800-09. doi: 10.1210/jc.2009-1952
208. Helal GK, Gad MA, Abd-Allah MF, et al. Coadministration of ezetimibe with pegylated interferon plus ribavirin could improve early virological response in chronic hepatitis C obese Egyptian patients. *European journal of gastroenterology & hepatology* 2016;28(5):553-57. doi: 10.1097/MEG.0000000000000587
209. Hougaard M, Hansen HS, Thayssen P, et al. Influence of ezetimibe on plaque morphology in patients with ST Elevation Myocardial Infarction assessed by Optical Coherence Tomography: an OCTIVUS sub-study. *Cardiovascular revascularization medicine* 2019 doi: 10.1016/j.carrev.2019.04.021
210. Joshi S, Sharma R, Rao HK, et al. Efficacy of combination therapy of rosuvastatin and ezetimibe vs rosuvastatin monotherapy on lipid profile of patients with coronary artery disease. *Journal of clinical and diagnostic research* 2017;11(12):OC28-OC31. doi: 10.7860/JCDR/2017/30458.11004
211. Kovarnik T, Mintz GS, Skalicka H, et al. Virtual histology evaluation of atherosclerosis regression during atorvastatin and ezetimibe administration: HEAVEN study. *Circulation journal* 2012;76(1):176-83. doi: 10.1253/circj.cj-11-0730
212. Izar MC, Machado VA, Fonseca HA, et al. Plant sterol supplementation on top of lipid-lowering therapies in familial hypercholesterolemia. *European Heart Journal* 2015;36:285. doi: <http://dx.doi.org/10.1093/eurheartj/ehv399>
213. Marazzi G, Campolongo G, Pelliccia F, et al. Usefulness of Low-Dose Statin Plus Ezetimibe and/or Nutraceuticals in Patients With Coronary Artery Disease Intolerant to High-Dose Statin Treatment. *American journal of cardiology* 2019;123(2):233-38. doi: 10.1016/j.amjcard.2018.09.041
214. Marazzi G, Pelliccia F, Campolongo G, et al. Usefulness of Nutraceuticals (Armolid Plus) Versus Ezetimibe and Combination in Statin-Intolerant Patients With Dyslipidemia With Coronary Heart Disease. *American journal of cardiology* 2015;116(12):1798-801. doi: 10.1016/j.amjcard.2015.09.023
215. Musliner T, Cselovszky D, Sirah W, et al. Efficacy and safety of ezetimibe 40 mg vs. ezetimibe 10 mg in the treatment of patients with homozygous sitosterolaemia. *International journal of clinical practice* 2008;62(7):995-1000. doi: 10.1111/j.1742-1241.2008.01786.x
216. Nakamura T, Sato E, Fujiwara N, et al. Co-administration of ezetimibe enhances proteinuria-lowering effects of pitavastatin in chronic kidney disease patients partly via a cholesterol-independent manner. *Pharmacological research* 2010;61(1):58-61. doi: 10.1016/j.phrs.2009.07.011
217. Nakamura T, Hirano M, Kitta Y, et al. A comparison of the efficacy of combined ezetimibe and statin therapy with doubling of statin dose in patients with remnant

- lipoproteinemia on previous statin therapy. *Journal of cardiology* 2012;60(1):12-17. doi: 10.1016/j.jjcc.2012.02.005
218. Ose L, Johnson-Levonas A, Reyes R, et al. A multi-centre, randomised, double-blind 14-week extension study examining the long-term safety and efficacy profile of the ezetimibe/simvastatin combination tablet. *International journal of clinical practice* 2007;61(9):1469-80. doi: 10.1111/j.1742-1241.2007.01402.x
219. Ouchi Y, Sasaki J, Arai H, et al. Ezetimibe Lipid-Lowering Trial on Prevention of Atherosclerotic Cardiovascular Disease in 75 or Older (EWTOPIA 75): a Randomized, Controlled Trial. *Circulation* 2019;140(12):992-1003. doi: 10.1161/CIRCULATIONAHA.118.039415
220. Pytel E, Bukowska B, Koter-Michalak M, et al. Effect of intensive lipid-lowering therapies on cholinesterase activity in patients with coronary artery disease. *Pharmacological reports : PR* 2017;69(1):150-55. doi: 10.1016/j.pharep.2016.09.016
221. Pytel E, Jackowska P, Chwatko G, et al. Intensive statin therapy, used alone or in combination with ezetimibe, improves homocysteine level and lipid peroxidation to a similar degree in patients with coronary artery diseases. *Pharmacological reports : PR* 2016;68(2):344-48. doi: 10.1016/j.pharep.2015.08.019
222. Sugiyama S, Jinnouchi H, Hieshima K, et al. A pilot study of ezetimibe vs. atorvastatin for improving peripheral microvascular endothelial function in stable patients with type 2 diabetes mellitus. *Lipids in health and disease* 2015;14:37. doi: 10.1186/s12944-015-0028-z
223. Takase H, Dohi Y, Okado T, et al. Effects of ezetimibe on visceral fat in the metabolic syndrome: a randomised controlled study. *European journal of clinical investigation* 2012;42(12):1287-94. doi: 10.1111/eci.12000
224. Liu C, Liu Q, Xiao X. Effectiveness and safety of combinational therapy compared with intensified statin monotherapy in patients with coronary heart disease. *Experimental Ther* 2018;15(6):4683-88. doi: <https://dx.doi.org/10.3892/etm.2018.6024>
225. Sudhop T, Reber M, Tribble D, et al. Changes in cholesterol absorption and cholesterol synthesis caused by ezetimibe and/or simvastatin in men. *Journal of lipid research* 2009;50(10):2117-23. doi: 10.1194/jlr.P900004-JLR200
226. Tremblay AJ, Lamarche B, Hogue JC, et al. Effects of ezetimibe and simvastatin on apolipoprotein B metabolism in males with mixed hyperlipidemia. *Journal of lipid research* 2009;50(7):1463-71. doi: 10.1194/jlr.P800061-JLR200
227. Uemura Y, Watarai M, Ishii H, et al. Atorvastatin 10 mg plus ezetimibe 10 mg compared with atorvastatin 20 mg: Impact on the lipid profile in Japanese patients with abnormal glucose tolerance and coronary artery disease. *Journal of Cardiology* doi: <http://dx.doi.org/10.1016/j.jjcc.2011.09.001>
228. Bays H, Sapre A, Taggart W, et al. Long-term (48-week) safety of ezetimibe 10 mg/day coadministered with simvastatin compared to simvastatin alone in patients with primary hypercholesterolemia. *Curr Med Res Opin* 2008;24(10):2953-66. doi: <https://dx.doi.org/10.1185/03007990802365094>

229. Abu Rajab M, Kaplan MM. Statins in primary biliary cirrhosis: are they safe? *Dig Dis Sci* 2010;55(7):2086-8. doi: <https://dx.doi.org/10.1007/s10620-009-0988-9>
230. Allahyari A, Jernberg T, Lautsch D, et al. LDL-cholesterol target attainment according to the 2011 and 2016 ESC/EAS dyslipidaemia guidelines in patients with a recent myocardial infarction - nationwide cohort study, 2013-2017. *European heart journal Quality of care & clinical outcomes* 2020;06 doi: <http://dx.doi.org/10.1093/ehjqcco/qcaa016>
231. Andrikopoulos G, Terentes-Printzios D, Tzeis S, et al. Epidemiological characteristics, management and early outcomes of acute coronary syndromes in Greece: The PHAETHON study. *Hellenic Journal of Cardiology* 2016;57(3):157-66. doi: <http://dx.doi.org/10.1016/j.hjc.2016.06.003>
232. Andrikopoulos G, Tzeis S, Nikas N, et al. Short-term outcome and attainment of secondary prevention goals in patients with acute coronary syndrome-Results from the countrywide TARGET study. *International Journal of Cardiology* 2013;168(2):922-27. doi: <http://dx.doi.org/10.1016/j.ijcard.2012.10.049>
233. Allahyari A, Jernberg T, Hagstrom E, et al. Application of the 2019 ESC/EAS dyslipidaemia guidelines to nationwide data of patients with a recent myocardial infarction: a simulation study. *European heart journal* 2020;18 doi: <http://dx.doi.org/10.1093/eurheartj/ehaa034>
234. Alsabbagh WM, Dagenais J, Yan L, et al. Use and misuse of ezetimibe: Analysis of use and cost in Saskatchewan, a Canadian jurisdiction with broad access. *Canadian Journal of Cardiology* 2014;30(2):237-43. doi: <http://dx.doi.org/10.1016/j.cjca.2013.11.031>
235. Ambegaonkar B, Chirovsky D, Tse HF, et al. Attainment of normal lipid levels among patients on lipid-modifying therapy in Hong Kong. *Advances in Therapy* 2012;29(5):427-41. doi: <http://dx.doi.org/10.1007/s12325-012-0017-9>
236. Barbir M, Breen J, Neves E, et al. Diagnosis, management and prognosis of familial hypercholesterolaemia in a UK tertiary cardiac centre. *Clinical Lipidology and Metabolic Disorders* 2019;14(1):1-10. doi: <http://dx.doi.org/10.1080/17584299.2019.1587877>
237. Arca M, Ansell D, Aversa M, et al. Statin utilization and lipid goal attainment in high or very-high cardiovascular risk patients: Insights from Italian general practice. *Atherosclerosis* 2018;271:120-27. doi: <http://dx.doi.org/10.1016/j.atherosclerosis.2018.02.024>
238. Berkelmans GFN, Gudbjornsdottir S, Visseren FLJ, et al. Prediction of individual life-years gained without cardiovascular events from lipid, blood pressure, glucose, and aspirin treatment based on data of more than 500 000 patients with Type 2 diabetes mellitus. *European Heart Journal* 2019;40(34):2899-906. doi: <http://dx.doi.org/10.1093/eurheartj/ehy839>
239. Bertolotti M, Franchi C, Rocchi MBL, et al. Prevalence and Determinants of the Use of Lipid-Lowering Agents in a Population of Older Hospitalized Patients: the Findings from the REPOSI (Registro POLiterapie Societa Italiana di Medicina

- Interna) Study. *Drugs and Aging* 2017;34(4):311-19. doi: <http://dx.doi.org/10.1007/s40266-017-0448-8>
240. Blom DJ, Almahmeed W, Al-Rasadi K, et al. Low-density lipoprotein cholesterol goal achievement in patients with familial hypercholesterolemia in countries outside Western Europe: The International ChoLesterol management Practice Study. *Journal of Clinical Lipidology* 2019;13(4):594-600. doi: <http://dx.doi.org/10.1016/j.jacl.2019.05.004>
241. Booth JN, Colantonio LD, Chen L, et al. Statin Discontinuation, Reinitiation, and Persistence Patterns among Medicare Beneficiaries after Myocardial Infarction: A Cohort Study. *Circulation: Cardiovascular Quality and Outcomes* 2017;10(10) doi: <http://dx.doi.org/10.1161/CIRCOUTCOMES.117.003626>
242. Botha TC, Pilcher GJ, Wolmarans K, et al. Statins and other lipid-lowering therapy and pregnancy outcomes in homozygous familial hypercholesterolaemia: A retrospective review of 39 pregnancies. *Atherosclerosis* 2018;277:502-07. doi: <http://dx.doi.org/10.1016/j.atherosclerosis.2018.05.038>
243. Boytsov S, Logunova N, Khomitskaya Y, et al. Suboptimal control of lipid levels: Results from the non-interventional Centralized Pan-Russian Survey of the Undertreatment of Hypercholesterolemia II (CEPHEUS II). *Cardiovascular Diabetology* 2017;16(1) doi: <http://dx.doi.org/10.1186/s12933-017-0641-4>
244. Brandt EJ, Benes LB, Lee L, et al. The Effect of Proprotein Convertase Subtilisin/Kexin Type 9 Inhibition on Sterol Absorption Markers in a Cohort of Real-World Patients. *Journal of Cardiovascular Pharmacology and Therapeutics* 2019;24(1):54-61. doi: <http://dx.doi.org/10.1177/1074248418780733>
245. Buonvino C, Chopard R, Guillon B, et al. An innovative lipid-lowering approach to enhance attainment of low-density lipoprotein cholesterol goals. *European Heart Journal: Acute Cardiovascular Care* 2020 doi: <http://dx.doi.org/10.1177/2048872620912639>
246. Buddhari W, Uerojanaungkul P, Sriratanasathavorn C, et al. Low-Density Lipoprotein Cholesterol Target Attainment in Patients Surviving an Acute Coronary Syndrome in Thailand: Results From the Dyslipidaemia International Study (DYSIS) II. *Heart Lung and Circulation* 2020;29(3):405-13. doi: <http://dx.doi.org/10.1016/j.hlc.2019.02.193>
247. Burton WN, Chen CY, Schultz AB, et al. The association between achieving low-density lipoprotein cholesterol (LDL-C) goal and statin treatment in an employee population. *Population Health Management* 2010;13(1):1-8. doi: <http://dx.doi.org/10.1089/pop.2009.0020>
248. Burke JP, Simpson RJ, Paoli CJ, et al. Longitudinal treatment patterns among US patients with atherosclerotic cardiovascular disease or familial hypercholesterolemia initiating lipid-lowering pharmacotherapy. *Journal of Clinical Lipidology* 2016;10(6):1470-80.e3. doi: <http://dx.doi.org/10.1016/j.jacl.2016.09.002>

249. Cannon CP, Khan I, Klimchak AC, et al. Simulation of Lipid-Lowering Therapy Intensification in a Population With Atherosclerotic Cardiovascular Disease. *JAMA Cardiology* 2017;2(9):959-66. doi: <https://dx.doi.org/10.1001/jamacardio.2017.2289>
250. Chen G, Farris MS, Cowling T, et al. Treatment and Low-Density Lipoprotein Cholesterol Management in Patients Diagnosed With Clinical Atherosclerotic Cardiovascular Disease in Alberta. *Canadian Journal of Cardiology* 2019;35(7):884-91. doi: <http://dx.doi.org/10.1016/j.cjca.2019.04.008>
251. Choi SY, Yang BR, Kang HJ, et al. Contemporary use of lipid-lowering therapy for secondary prevention in Korean patients with atherosclerotic cardiovascular diseases. *Korean Journal of Internal Medicine* 2020;35(3):593-604. doi: <http://dx.doi.org/10.3904/kjim.2018.312>
252. Chuang P, Langone AJ. Ezetimibe reduces low-density lipoprotein cholesterol (LDL-C) in renal transplant patients resistant to HMG-CoA reductase inhibitors. *American Journal of Therapeutics* 2007;14(5):438-41. doi: <http://dx.doi.org/10.1097/01.mjt.0000209693.83065.a6>
253. Cicero AFG, Toth PP, Fogacci F, et al. Improvement in arterial stiffness after short-term treatment with PCSK9 inhibitors. *Nutrition, Metabolism and Cardiovascular Diseases* 2019;29(5):527-29. doi: <http://dx.doi.org/10.1016/j.numecd.2019.01.010>
254. Clemens KK, Shariff SZ, McArthur E, et al. Ezetimibe prescriptions in older Canadian adults after an acute myocardial infarction: A population-based cohort study. *Lipids in Health and Disease* 2018;17(1) doi: <http://dx.doi.org/10.1186/s12944-017-0649-5>
255. Colivicchi F, Gulizia MM, Franzini L, et al. Clinical Implications of Switching Lipid Lowering Treatment from Rosuvastatin to Other Agents in Primary Care. *Adv Ther* 2016;33(11):2049-58.
256. Colivicchi F, Massimo Gulizia M, Arca M, et al. Lipid Lowering Treatment and Eligibility for PCSK9 Inhibition in Post-Myocardial Infarction Patients in Italy: Insights from Two Contemporary Nationwide Registries. *Cardiovascular Therapeutics* 2020;2020 (no pagination) doi: <http://dx.doi.org/10.1155/2020/3856242>
257. Coste J, Billionnet C, Rudnichi A, et al. Statins for primary prevention and rhabdomyolysis: A nationwide cohort study in France. *European Journal of Preventive Cardiology* 2019;26(5):512-21. doi: <http://dx.doi.org/10.1177/2047487318776831>
258. Cziraky MJ, Willey VJ, McKenney JM, et al. Risk of hospitalized rhabdomyolysis associated with lipid-lowering drugs in a real-world clinical setting. *Journal of Clinical Lipidology* 2013;7(2):102-08. doi: <http://dx.doi.org/10.1016/j.jacl.2012.06.006>
259. Danese MD, Gleeson M, Kutikova L, et al. Management of lipid-lowering therapy in patients with cardiovascular events in the UK: A retrospective cohort study. *BMJ Open* 2017;7(5) doi: <http://dx.doi.org/10.1136/bmjopen-2016-013851>

260. Dedinska I, Laca L, Miklusica J, et al. Waist circumference as an independent risk factor for NODAT. *Annals of Transplantation* 2015;20:154-59. doi: <http://dx.doi.org/10.12659/AOT.892067>
261. Degoma EM, Ahmad ZS, O'Brien EC, et al. Treatment gaps in adults with heterozygous familial hypercholesterolemia in the United States. *Circulation: Cardiovascular Genetics* 2016;9(3):240-49. doi: <http://dx.doi.org/10.1161/CIRCGENETICS.116.001381>
262. Del Ben M, Baratta F, Polimeni L, et al. Under-prescription of statins in patients with non-alcoholic fatty liver disease. *Nutrition, Metabolism and Cardiovascular Diseases* 2017;27(2):161-67. doi: <http://dx.doi.org/10.1016/j.numecd.2016.09.011>
263. Despas F, Rousseau V, Lafaurie M, et al. Are lipid-lowering drugs associated with a risk of cataract? A pharmacovigilance study. *Fundamental and Clinical Pharmacology* 2019;33(6):695-702. doi: <http://dx.doi.org/10.1111/fcp.12496>
264. Di Pierro F, Putignano P, Ferrara T, et al. Retrospective analysis of the effects of a highly standardized mixture of Berberis aristata, Silybum marianum, and monacolins K and KA in patients with dyslipidemia. *Clinical Pharmacology: Advances and Applications* 2017;9(no pagination) doi: <http://dx.doi.org/10.2147/CPAA.S120032>
265. Di Taranto MD, Giacobbe C, Buonaiuto A, et al. A real-world experience of clinical, biochemical and genetic assessment of patients with homozygous familial hypercholesterolemia. *Journal of Clinical Medicine* 2020;9(1) doi: <http://dx.doi.org/10.3390/jcm9010219>
266. Duell PB, Gidding SS, Andersen RL, et al. Longitudinal low density lipoprotein cholesterol goal achievement and cardiovascular outcomes among adult patients with familial hypercholesterolemia: The CASCADE FH registry. *Atherosclerosis* 2019;289:85-93. doi: <http://dx.doi.org/10.1016/j.atherosclerosis.2019.08.007>
267. Dyrbus K, Gasior M, Desperak P, et al. Characteristics of lipid profile and effectiveness of management of dyslipidaemia in patients with acute coronary syndromes - Data from the TERCET registry with 19,287 patients. *Pharmacological Research* 2019;139:460-66. doi: <http://dx.doi.org/10.1016/j.phrs.2018.12.002>
268. Eliasson B, Svensson AM, Miftaraj M, et al. Clinical use and effectiveness of lipid lowering therapies in diabetes mellitus-an observational study from the Swedish National diabetes Register. *PLoS ONE* 2011;6(4) doi: <http://dx.doi.org/10.1371/journal.pone.0018744>
269. Elis A, Zhou R, Stein EA. Effect of lipid-lowering treatment on natural history of heterozygous familial hypercholesterolemia in past three decades. *American Journal of Cardiology* 2011;108(2):223-26. doi: <http://dx.doi.org/10.1016/j.amjcard.2011.03.027>
270. Faggiano P, Fattirolli F, Frisinghelli A, et al. Secondary prevention advices after cardiovascular index event: From drug prescription to risk factors control in real world practice. *Monaldi Archives for Chest Disease* 2019;89(2):143-50. doi: <http://dx.doi.org/10.4081/monaldi.2019.1040>

271. Ferrieres J, Gorcyca K, Iorga R, et al. Lipid-lowering Therapy and Goal Achievement in High-risk Patients From French General Practice. *Clinical Therapeutics* 2018;40(9):1484-95.e22. doi: <http://dx.doi.org/10.1016/j.clinthera.2018.07.008>
272. Friedman HS, Rajagopalan S, Barnes JP, et al. Effectiveness of ezetimibe monotherapy in patients with hypercholesterolemia. *American Journal of Pharmacy Benefits* 2010;2(4):267-74.
273. Galema-Boers AM, Lenzen MJ, Engelkes SR, et al. Cardiovascular risk in patients with familial hypercholesterolemia using optimal lipid-lowering therapy. *Journal of Clinical Lipidology* 2018;12(2):409-16. doi: <http://dx.doi.org/10.1016/j.jacl.2017.12.014>
274. Garcia Ruiz FJ, Marin Ibanez A, Perez-Jimenez F, et al. Current lipid management and low cholesterol goal attainment in common daily practice in Spain: The REALITY study. *Pharmacoeconomics* 2004;22(SUPPL. 3):1-12.
275. Gallo A, Vimont A, Chapman MJ, et al. SAFEHEART risk-equation and cholesterol-year-score are powerful predictors of cardiovascular events in French patients with familial hypercholesterolemia. *Atherosclerosis* 2020;306:41-49. doi: <http://dx.doi.org/10.1016/j.atherosclerosis.2020.06.011>
276. Gitt AK, Lautsch D, Ferrieres J, et al. Cholesterol target value attainment and lipid-lowering therapy in patients with stable or acute coronary heart disease: Results from the Dyslipidemia International Study II. *Atherosclerosis* 2017;266:158-66. doi: <http://dx.doi.org/10.1016/j.atherosclerosis.2017.08.013>
277. Gitt AK, Lautsch D, Ferrieres J, et al. Contemporary data on treatment practices for low-density lipoprotein cholesterol in 6794 patients with stable coronary heart disease across the world. *Data Brief* 2018;18:1937-40. doi: <https://dx.doi.org/10.1016/j.dib.2018.04.092>
278. Bae J, Hong N, Lee BW, et al. Comparison of renal effects of ezetimibe-statin combination versus statin monotherapy: A propensity-score-matched analysis. *Journal of Clinical Medicine* 2020;9(3) doi: <http://dx.doi.org/10.3390/jcm9030798>
279. Barkas F, Liberopoulos E, Klouras E, et al. Attainment of multifactorial treatment targets among the elderly in a lipid clinic. *Journal of Geriatric Cardiology* 2015;12(3):239-45. doi: <http://dx.doi.org/10.11909/j.issn.1671-5411.2015.03.004>
280. Barkas F, Milionis H, Kostapanos MS, et al. How effective are the ESC/EAS and 2013 ACC/AHA guidelines in treating dyslipidemia? Lessons from a lipid clinic. *Current Medical Research and Opinion* 2015;31(2):221-28. doi: <http://dx.doi.org/10.1185/03007995.2014.982751>
281. Bartlett LE, Pratt NL, Roughead EE. Prior experience with cardiovascular medicines predicted longer persistence in people initiated to combinations of antihypertensive and lipid-lowering therapies: Findings from two australian cohorts. *Patient Preference and Adherence* 2018;12:835-43. doi: <http://dx.doi.org/10.2147/PPA.S150142>



282. Baum SJ, Wade RL, Xiang P, et al. Demographic And Clinical Characteristics Of Patients Prescribed Proprotein Convertase Subtilisin/kexin Type 9 Inhibitor Therapy And Patients Whose Current Lipid-Lowering Therapy Was Modified. *Ther Clin Risk Manag* 2019;15:1325-32. doi: <https://dx.doi.org/10.2147/TCRM.S216606>
283. Bays HE, Patel MD, Mavros P, et al. Real-world data to assess changes in low-density lipoprotein cholesterol and predicted cardiovascular risk after ezetimibe discontinuation post reporting of the Ezetimibe and Simvastatin in Hypercholesterolemia Enhances Atherosclerosis Regression trial. *Journal of Clinical Lipidology* 2017;11(4):929-37. doi: <https://dx.doi.org/10.1016/j.jacl.2017.04.121>
284. Chang SH, Wu LS, Lee CH, et al. Simvastatin-ezetimibe combination therapy is associated with a lower rate of major adverse cardiac events in type 2 diabetics than high potency statins alone: A population-based dynamic cohort study. *International Journal of Cardiology* 2015;190(1):20-25. doi: <http://dx.doi.org/10.1016/j.ijcard.2015.04.121>
285. Chen CC, Rane PB, Hines DM, et al. Low-density lipoprotein cholesterol outcomes post-non-PCSK9i lipid-lowering therapies in atherosclerotic cardiovascular disease and probable heterozygous familial hypercholesterolemia patients. *Therapeutics and Clinical Risk Management* 2018;14:2425-35. doi: <http://dx.doi.org/10.2147/TCRM.S180783>
286. Chen WJ, Wen YC, Fox KM, et al. Treatment patterns of lipid-lowering therapies and possible statin intolerance among statin users with clinical atherosclerotic cardiovascular disease (ASCVD) or diabetes mellitus (DM) in Taiwan. *Journal of Evaluation in Clinical Practice* 2020;26(4):1171-80. doi: <http://dx.doi.org/10.1111/jep.13286>
287. Ebisawa S, Izawa A, Ueki Y, et al. Impact of combination therapy with statin and ezetimibe on secondary prevention for post-acute myocardial infarction patients in the statin era. *IJC Heart and Vasculature* 2015;8:154-60. doi: <http://dx.doi.org/10.1016/j.ijcha.2015.07.007>
288. Fazio S, Guyton JR, Polis AB, et al. Long-term safety and efficacy of triple combination ezetimibe/simvastatin plus extended-release niacin in patients with hyperlipidemia. *American Journal of Cardiology* 2010;105(4):487-94. doi: <https://dx.doi.org/10.1016/j.amjcard.2009.10.001>
289. Ferrieres J, Dallongeville J, Rossignol M, et al. Model-observational bridging study on the effectiveness of ezetimibe on cardiovascular morbidity and mortality in France: A population-based study. *Journal of Clinical Lipidology* 2016;10(6):1379-88. doi: <https://dx.doi.org/10.1016/j.jacl.2016.08.015>
290. Foody JAM, Toth PP, Tomassini JE, et al. Changes in LDL-C levels and goal attainment associated with addition of ezetimibe to simvastatin, atorvastatin, or rosuvastatin compared with titrating statin monotherapy. *Vascular Health and Risk Management* 2013;9(1):719-27. doi: <http://dx.doi.org/10.2147/VHRM.S49840>
291. Foody JM, Toth PP, Tomassini JE, et al. Changes in LDL-C levels and goal attainment associated with addition of ezetimibe to simvastatin, atorvastatin, or

- rosuvastatin compared with titrating statin monotherapy. *Vasc Health Risk Manag* 2013;9:719-27. doi: <https://dx.doi.org/10.2147/VHRM.S49840>
292. Friedman HS, Rajagopalan S, Barnes JP, et al. Combination Therapy With Ezetimibe/Simvastatin Versus Statin Monotherapy for Low-Density Lipoprotein Cholesterol Reduction and Goal Attainment in a Real-World Clinical Setting. *Clinical Therapeutics* 2011;33(2):212-24. doi: <http://dx.doi.org/10.1016/j.clinthera.2011.02.011>
293. Fung EC, Crook MA. Statin myopathy: A lipid clinic experience on the tolerability of statin Rechallenge. *Cardiovascular Therapeutics* 2012;30(5):e212-e18. doi: <http://dx.doi.org/10.1111/j.1755-5922.2011.00267.x>
294. Guglielmi V, Bellia A, Pecchioli S, et al. Effectiveness of adherence to lipid lowering therapy on LDL-cholesterol in patients with very high cardiovascular risk: A real-world evidence study in primary care. *Atherosclerosis* 2017;263:36-41. doi: <https://dx.doi.org/10.1016/j.atherosclerosis.2017.05.018>
295. Hall GC, Amber V, O'Regan C, et al. Observational study of ezetimibe discontinuation in primary care practices in the UK. *Current Medical Research and Opinion* 2013;29(12):1737-45. doi: <http://dx.doi.org/10.1185/03007995.2013.842164>
296. Hambraeus K, Lindhagen L, Tyden P, et al. Target-attainment rates of low-density lipoprotein cholesterol using lipid-lowering drugs one year after acute myocardial infarction in Sweden. *American Journal of Cardiology* 2014;113(1):17-22. doi: <https://dx.doi.org/10.1016/j.amjcard.2013.09.007>
297. Harada-Shiba M, Ako J, Arai H, et al. Prevalence of familial hypercholesterolemia in patients with acute coronary syndrome in Japan: Results of the EXPLORE-J study. *Atherosclerosis* 2018;277:362-68. doi: <http://dx.doi.org/10.1016/j.atherosclerosis.2018.06.856>
298. Harris LJ, Thapa R, Brown M, et al. Clinical and laboratory phenotype of patients experiencing statin intolerance attributable to myalgia. *Journal of Clinical Lipidology* 2011;5(4):299-307. doi: <http://dx.doi.org/10.1016/j.jacl.2011.05.005>
299. Harrison TN, Hsu JWY, Rosenson RS, et al. Unmet Patient Need in Statin Intolerance: the Clinical Characteristics and Management. *Cardiovascular Drugs and Therapy* 2018;32(1):29-36. doi: <http://dx.doi.org/10.1007/s10557-018-6775-0>
300. Hess G, Chang CL, Chung K. Lipid attainment among patients newly treated with lipid-altering drugs. *Current Medical Research and Opinion* 2014;30(9):1743-56. doi: <http://dx.doi.org/10.1185/03007995.2014.925436>
301. Ho LT, Yin WH, Chuang SY, et al. Determinants for achieving the LDL-C target of lipid control for secondary prevention of cardiovascular events in Taiwan. *PLoS ONE* 2015;10(3) doi: <http://dx.doi.org/10.1371/journal.pone.0116513>
302. Hodgkins AJ, Mullan J, Mayne DJ, et al. The use of primary care electronic health records for research: Lipid medications and mortality in elderly patients. *Pharmacy* 2019;7(3) doi: <http://dx.doi.org/10.3390/pharmacy7030134>

303. Jackevicius CA, Tu JV, Ross JS, et al. Use of ezetimibe in the United States and Canada. *New England Journal of Medicine* 2008;358(17):1819-28. doi: <http://dx.doi.org/10.1056/NEJMsa0801461>
304. Jameson K, Amber V, D'Oca K, et al. Impact of lipid-lowering therapy on the prevalence of dyslipidaemia in patients at high-risk of cardiovascular events in UK primary care - A retrospective database study. *International Journal of Clinical Practice* 2013;67(12):1228-37. doi: <http://dx.doi.org/10.1111/ijcp.12238>
305. Jensen JS, Weeke PE, Bang LE, et al. Clinical characteristics and lipid lowering treatment of patients initiated on proprotein convertase subtilisin-kexin type 9 inhibitors: A nationwide cohort study. *BMJ Open* 2019;9(4) doi: <http://dx.doi.org/10.1136/bmjopen-2018-022702>
306. Jung J, Bae GH, Kang M, et al. Statins and All-Cause Mortality in Patients Undergoing Hemodialysis. *Journal of the American Heart Association* 2020;9(5):e014840. doi: <http://dx.doi.org/10.1161/JAHA.119.014840>
307. Kamal-Bahl SJ, Burke T, Watson D, et al. Discontinuation of Lipid Modifying Drugs Among Commercially Insured United States Patients in Recent Clinical Practice. *American Journal of Cardiology* 2007;99(4):530-34. doi: <http://dx.doi.org/10.1016/j.amjcard.2006.08.063>
308. Karalis DG, Victor B, Ahedor L, et al. Use of lipid-lowering medications and the likelihood of achieving optimal LDL-cholesterol goals in coronary artery disease patients. *Cholesterol* 2012;2012 (no pagination) doi: <http://dx.doi.org/10.1155/2012/861924>
309. Katzmann JL, Sorio-Vilela F, Dornstauder E, et al. Non-statin lipid-lowering therapy over time in very-high-risk patients: effectiveness of fixed-dose statin/ezetimibe compared to separate pill combination on LDL-C. *Clinical Research in Cardiology* 2020 doi: <http://dx.doi.org/10.1007/s00392-020-01740-8>
310. Katz PM, Mendelsohn AA, Goodman SG, et al. Use of a treatment optimization algorithm involving statin-ezetimibe combination aids in achievement of guideline-based low-density lipoprotein targets in patients with dyslipidemia at high vascular risk Guideline-based Undertaking to Improve Dyslipidemia Management in Canada (GUIDANC). *Canadian Journal of Cardiology* 2011;27(2):138-45. doi: <https://dx.doi.org/10.1016/j.cjca.2010.12.010>
311. Kawashiri MA, Sakata K, Hayashi K, et al. Impact of combined lipid lowering and blood pressure control on coronary plaque: myocardial ischemia treated by percutaneous coronary intervention and plaque regression by lipid lowering and blood pressure controlling assessed by intravascular ultrasonography (MILLION) study. *Heart and Vessels* 2017;32(5):539-48. doi: <http://dx.doi.org/10.1007/s00380-016-0910-2>
312. Khang AR, Song YS, Kim KM, et al. Comparison of different statin therapy to change low-density lipoprotein cholesterol and high-density lipoprotein cholesterol level in Korean patients with and without diabetes. *Journal of Clinical Lipidology* 2016;10(3):528-37.e3. doi: <https://dx.doi.org/10.1016/j.jacl.2015.12.013>

313. Kim S, Kim H, Kim E, et al. Utilization Patterns of Lipid-lowering Therapies in Patients With Atherosclerotic Cardiovascular Disease or Diabetes: A Population-based Study in South Korea. *Clinical Therapeutics* 2018;40(6):940-51.e7. doi: <https://dx.doi.org/10.1016/j.clinthera.2018.04.007>
314. Kiss Z, Nagy L, Reiber I, et al. Persistence with statin therapy in Hungary. *Archives of Medical Science* 2013;9(3):409-17. doi: <http://dx.doi.org/10.5114/aoms.2013.35327>
315. Kitkungvan D, Fillipon NML, Dani SS, et al. Low-density lipoprotein cholesterol target achievement in patients at high risk for coronary heart disease. *Journal of Clinical Lipidology* 2010;4(4):293-97. doi: <http://dx.doi.org/10.1016/j.jacl.2010.06.003>
316. Kuiper JG, Sanchez RJ, Houben E, et al. Use of Lipid-modifying Therapy and LDL-C Goal Attainment in a High-Cardiovascular-Risk Population in the Netherlands. *Clinical Therapeutics* 2017;39(4):819-27.e1. doi: <http://dx.doi.org/10.1016/j.clinthera.2017.03.001>
317. Latkovskis G, Saripo V, Gilis D, et al. Latvian registry of familial hypercholesterolemia: The first report of three-year results. *Atherosclerosis* 2018;277:347-54. doi: <http://dx.doi.org/10.1016/j.atherosclerosis.2018.06.011>
318. Lee HJ, Kim YJ, Hur J, et al. Prevalence and extent of atherosclerotic coronary artery disease and related outcome based on coronary computed tomographic angiography in asymptomatic elderly patients: Retrospective cohort study. *International Journal of Cardiovascular Imaging* 2014;30(3):669-76. doi: <http://dx.doi.org/10.1007/s10554-014-0366-3>
319. Levintow SN, Reading SR, Saul BC, et al. Lipid testing trends in the us before and after the release of the 2013 cholesterol treatment guidelines. *Clinical Epidemiology* 2020;12:835-45. doi: <http://dx.doi.org/10.2147/CLEP.S259757>
320. Lipworth L, Fazio S, Kabagambe EK, et al. A prospective study of statin use and mortality among 67,385 blacks and whites in the southeastern United States. *Clinical Epidemiology* 2014;6(1):15-25. doi: <http://dx.doi.org/10.2147/clep.s53492>
321. Lourenco C, Antonio N, Teixeira R, et al. Predictors of adverse outcome in a diabetic population following acute coronary syndromes. *Revista Portuguesa de Cardiologia* 2011;30(3):263-75.
322. Lynch JT, Cooke CE, Rosen J, et al. Managing dyslipidemia in primary care with restricted access to lipid-modifying therapy. *American Health and Drug Benefits* 2010;3(5):340-48.
323. Maahs DM, Ogden LG, Dabelea D, et al. Association of glycaemia with lipids in adults with type 1 diabetes: Modification by dyslipidaemia medication. *Diabetologia* 2010;53(12):2518-25. doi: <http://dx.doi.org/10.1007/s00125-010-1886-6>
324. Maggioni AP, Calabria S, Rossi E, et al. Use of lipid lowering drugs in patients at very high risk of cardiovascular events: An analysis on nearly 3,000,000 Italian subjects of the ARNO Observatory. *International Journal of Cardiology* 2017;246:62-67. doi: <http://dx.doi.org/10.1016/j.ijcard.2017.02.108>

325. Martin SS, Faridi KF, Joshi PH, et al. Remnant lipoprotein cholesterol and mortality after acute myocardial infarction: Further evidence for a hypercholesterolemia paradox from the TRIUMPH registry. *Clinical Cardiology* 2015;38(11):660-67. doi: <http://dx.doi.org/10.1002/clc.22470>
326. Marz W, Dippel FW, Theobald K, et al. Utilization of lipid-modifying therapy and low-density lipoprotein cholesterol goal attainment in patients at high and very-high cardiovascular risk: Real-world evidence from Germany. *Atherosclerosis* 2018;268:99-107. doi: <http://dx.doi.org/10.1016/j.atherosclerosis.2017.11.020>
327. Menzin J, Aggarwal J, Boatman B, et al. Ezetimibe use and LDL-C Goal achievement: A retrospective database analysis of patients with clinical atherosclerotic cardiovascular disease or probable heterozygous familial hypercholesterolemia. *Journal of Managed Care and Specialty Pharmacy* 2017;23(12):1270-76b. doi: <http://dx.doi.org/10.18553/jmcp.2017.16414>
328. Miname MH, Bittencourt MS, Pereira AC, et al. Vascular age derived from coronary artery calcium score on the risk stratification of individuals with heterozygous familial hypercholesterolaemia. *European Heart Journal Cardiovascular Imaging* 2020;21(3):251-57. doi: <http://dx.doi.org/10.1093/ehjci/jez280>
329. Murphy A, Hamilton G, Andrianopoulos N, et al. One-Year Outcomes of Patients With Established Coronary Artery Disease Presenting With Acute Coronary Syndromes. *American Journal of Cardiology* 2019;123(9):1387-92. doi: <http://dx.doi.org/10.1016/j.amjcard.2019.01.037>
330. Myers J, Rayment M, Sonecha S, et al. Room for manoeuvre when prescribing statins to dyslipidaemic patients on antiretroviral therapy. *HIV Medicine* 2012;13(3):190-92. doi: <http://dx.doi.org/10.1111/j.1468-1293.2011.00957.x>
331. Nagar SP, Rane PP, Fox KM, et al. Treatment patterns, statin intolerance, and subsequent cardiovascular events among Japanese patients with high cardiovascular risk initiating statin therapy. *Circulation Journal* 2018;82(4):1008-16. doi: <http://dx.doi.org/10.1253/circj.CJ-17-0811>
332. Nakamura M, Ako J, Arai H, et al. Investigation into lipid management in acute coronary syndrome patients from the EXPLORE-J study. *Journal of Atherosclerosis and Thrombosis* 2019;26(6):559-72. doi: <http://dx.doi.org/10.5551/jat.45583>
333. Paneni F, Cosentino F, Marrara F, et al. The clinical relevance of dysfunctional HDL in patients with coronary artery disease: A 3-year follow-up study. *International Journal of Cardiology* 2012;158(1):158-60. doi: <http://dx.doi.org/10.1016/j.ijcard.2012.04.032>
334. Park JE, Chiang CE, Munawar M, et al. Lipid-lowering treatment in hypercholesterolaemic patients: The CEPHEUS Pan-Asian survey. *European Journal of Preventive Cardiology* 2012;19(4):781-94. doi: <http://dx.doi.org/10.1177/1741826710397100>
335. Pasta A, Cremonini AL, Formisano E, et al. Long term follow-up of genetically confirmed patients with familial hypercholesterolemia treated with first and second-

- generation statins and then with PCSK9 monoclonal antibodies. *Atherosclerosis* 2020;308:6-14. doi: <https://dx.doi.org/10.1016/j.atherosclerosis.2020.07.006>
336. Peikert A, Kaier K, Merz J, et al. Residual inflammatory risk in coronary heart disease: incidence of elevated high-sensitive CRP in a real-world cohort. *Clinical Research in Cardiology* 2020;109(3):315-23. doi: <https://dx.doi.org/10.1007/s00392-019-01511-0>
337. Perez De Isla L, Alonso R, Watts GF, et al. Attainment of LDL-cholesterol treatment goals in patients with familial hypercholesterolemia: 5-year SAFEHEART registry follow-up. *Journal of the American College of Cardiology* 2016;67(11):1278-85. doi: <http://dx.doi.org/10.1016/j.jacc.2016.01.008>
338. Perez-Calahorra S, Laclaustra M, Marco-Benedi V, et al. Effect of lipid-lowering treatment in cardiovascular disease prevalence in familial hypercholesterolemia. *Atherosclerosis* 2019;284:245-52. doi: <http://dx.doi.org/10.1016/j.atherosclerosis.2019.02.003>
339. Petrov I, Dumitrescu A, Snejdrlava M, et al. Clinical Management of High and Very High Risk Patients with Hyperlipidaemia in Central and Eastern Europe: An Observational Study. *Advances in Therapy* 2019;36(3):608-20. doi: <http://dx.doi.org/10.1007/s12325-019-0879-1>
340. Petrov IS, Postadzhiyan AS, Tokmakova MP, et al. Management of High and Very High-Risk Subjects with Familial Hypercholesterolemia: Results from an Observational Study in Bulgaria. *Folia medica* 2018;60(3):389-96. doi: <http://dx.doi.org/10.2478/folmed-2018-0020>
341. Ponziani MC, Karamouzis I, Mele C, et al. Baseline glucose homeostasis predicts the new onset of diabetes during statin therapy: A retrospective study in real life. *Hormones* 2017;16(4):396-404. doi: <http://dx.doi.org/10.14310/horm.2002.1760>
342. Premstaller M, Perren M, Kocack K, et al. Dyslipidemia and lipid-lowering treatment in a hematopoietic stem cell transplant cohort: 25 years of follow-up data. *Journal of Clinical Lipidology* 2018;12(2):464-80.e3. doi: <http://dx.doi.org/10.1016/j.jacl.2017.11.008>
343. Punekar RS, Fox KM, Paoli CJ, et al. Lipid-lowering treatment modifications among patients with hyperlipidemia and a prior cardiovascular event: a US retrospective cohort study. *Current Medical Research and Opinion* 2017;33(5):869-76. doi: <http://dx.doi.org/10.1080/03007995.2017.1292898>
344. Rallidis LS, Kotakos C, Sourides V, et al. Attainment of optional low-density lipoprotein cholesterol goal of less than 70 mg/dl and impact on prognosis of very high risk stable coronary patients: A 3-year follow-up. *Expert Opinion on Pharmacotherapy* 2011;12(10):1481-89. doi: <http://dx.doi.org/10.1517/14656566.2011.591379>
345. Razek O, Cermakova L, Armani H, et al. Attainment of Recommended Lipid Targets in Patients With Familial Hypercholesterolemia: Real-World Experience With PCSK9 Inhibitors. *Canadian Journal of Cardiology* 2018;34(8):1004-09. doi: <http://dx.doi.org/10.1016/j.cjca.2018.04.014>

346. Reddy KJ, Singh M, Batsell RR, et al. Effects of lifestyle counseling and combination lipid-modifying therapy on lipoprotein-associated phospholipase A2 mass concentration. *Journal of Clinical Lipidology* 2009;3(4):275-80. doi: <http://dx.doi.org/10.1016/j.jacl.2009.06.004>
347. Schwaab B, Zeymer U, Jannowitz C, et al. Improvement of low-density lipoprotein cholesterol target achievement rates through cardiac rehabilitation for patients after ST elevation myocardial infarction or non-ST elevation myocardial infarction in Germany: Results of the PATIENT CARE registry. *European Journal of Preventive Cardiology* 2019;26(3):249-58. doi: <http://dx.doi.org/10.1177/2047487318817082>
348. Stroup JS, Kane MP, Busch RS. The antilipidemic effects of ezetimibe in patients with diabetes. *Diabetes Care* 2003;26(10):2958-59. doi: <http://dx.doi.org/10.2337/diacare.26.10.2958-a>
349. Virani SS, Akeroyd JM, Nambi V, et al. Estimation of Eligibility for Proprotein Convertase Subtilisin/Kexin Type 9 Inhibitors and Associated Costs Based on the FOURIER Trial (Further Cardiovascular Outcomes Research with PCSK9 Inhibition in Subjects with Elevated Risk): Insights from the Department of Veterans Affairs. *Circulation* 2017;135(25):2572-74. doi: <http://dx.doi.org/10.1161/CIRCULATIONAHA.117.028503>
350. Virani SS, Akeroyd JM, Smith SC, et al. Very High-Risk ASCVD and Eligibility for Nonstatin Therapies Based on the 2018 AHA/ACC Cholesterol Guidelines. *Journal of the American College of Cardiology* 2019;74(5):712-14. doi: <http://dx.doi.org/10.1016/j.jacc.2019.05.051>
351. Hayek S, Canepa Escaro F, Sattar A, et al. Effect of ezetimibe on major atherosclerotic disease events and all-cause mortality. *American Journal of Cardiology* 2013;111(4):532-39. doi: <http://dx.doi.org/10.1016/j.amjcard.2012.11.002>
352. Huang Z, Li Q, Ye W, et al. Efficacy and safety of ezetimibe in combination with atorvastatin for acute coronary syndrome patients accompanied with type 2 diabetes: A Single-Center, Non-randomized Cohort Study. *Chemical and Pharmaceutical Bulletin* 2019;67(5):419-25. doi: <http://dx.doi.org/10.1248/cpb.c18-00685>
353. Inoue I, Awata T, Katayama S. Retrospective, observation study: Quantitative and qualitative effect of ezetimibe and HMG-CoA reductase inhibitors on LDL-cholesterol: Are there disappearance thresholds for small, dense LDL and IDL? *Recent Patents on Cardiovascular Drug Discovery* 2010;5(2):143-52. doi: <http://dx.doi.org/10.2174/157489010791515386>
354. Ji MS, Jeong MH, Ahn YK, et al. Clinical outcome of statin plus ezetimibe versus high-intensity statin therapy in patients with acute myocardial infarction propensity-score matching analysis. *International Journal of Cardiology* 2016;225:50-59. doi: <http://dx.doi.org/10.1016/j.ijcard.2016.09.082>
355. Lee YH, Hong N, Lee CJ, et al. Differential association of ezetimibe-simvastatin combination with major adverse cardiovascular events in patients with or without

- diabetes: a retrospective propensity score-matched cohort study. *Scientific Reports* 2018;8(1):11925. doi: <https://dx.doi.org/10.1038/s41598-018-30409-6>
356. Lee YH, Kim MJ, Choi CI, et al. Retrospective study on antihyperlipidemic efficacy and safety of simvastatin, ezetimibe and their combination in Korean adults. *Archives of Pharmacal Research* 2011;34(8):1331-37. doi: <http://dx.doi.org/10.1007/s12272-011-0813-9>
357. Lin CF, Gau CS, Wu FL, et al. Impact of ezetimibe coadministered with statins on cardiovascular events following acute coronary syndrome: a 3-year population-based retrospective cohort study in Taiwan. *Clinical Therapeutics* 2011;33(9):1120-31. doi: <https://dx.doi.org/10.1016/j.clinthera.2011.08.002>
358. Lin Wu FL, Wang J, Ho W, et al. Effectiveness of a combination of ezetimibe and statins in patients with acute coronary syndrome and multiple comorbidities: A 6-year population-based cohort study. *International Journal of Cardiology* 2017;233:43-51. doi: <https://dx.doi.org/10.1016/j.ijcard.2017.02.006>
359. Liu C, Liu Q, Xiao X. Effectiveness and safety of combinational therapy compared with intensified statin monotherapy in patients with coronary heart disease. *Experimental and Therapeutic Medicine* 2018;15(6):4683-88. doi: <http://dx.doi.org/10.3892/etm.2018.6024>
360. Liu CH, Chen TH, Lin MS, et al. Ezetimibe-simvastatin therapy reduce recurrent ischemic stroke risks in type 2 diabetic patients. *Journal of Clinical Endocrinology and Metabolism* 2016;101(8):2994-3001. doi: <http://dx.doi.org/10.1210/jc.2016-1831>
361. Mandraffino G, Scicali R, Rodriguez-Carrio J, et al. Arterial stiffness improvement after adding on PCSK9 inhibitors or ezetimibe to high-intensity statins in patients with familial hypercholesterolemia: A Two-Lipid Center Real-World Experience. *Journal of Clinical Lipidology* 2020;14(2):231-40. doi: <https://dx.doi.org/10.1016/j.jacl.2020.01.015>
362. Meng PN, Yin DL, Lu WQ, et al. Intensive statin versus low-dose statin + ezetimibe treatment for fibrous cap thickness of coronary vulnerable plaques. *Chinese medical journal* 2020;03 doi: <http://dx.doi.org/10.1097/CM9.0000000000001067>
363. Patel AY, Pillarisetti J, Marr J, et al. Ezetimibe in combination with a statin does not reduce all-cause mortality. *J Clin Med Res* 2013;5(4):275-80. doi: <https://dx.doi.org/10.4021/jocmr1371w>
364. Pauriah M, Elder DH, Ogston S, et al. High-potency statin and ezetimibe use and mortality in survivors of an acute myocardial infarction: a population-based study. *Heart* 2014;100(11):867-72. doi: <https://dx.doi.org/10.1136/heartjnl-2013-304678>
365. Schwab P, Louder A, Li Y, et al. Cholesterol Treatment Patterns and Cardiovascular Clinical Outcomes Associated with Colesevelam HCl and Ezetimibe. *Drugs and Aging* 2014;31(9):683-94. doi: <http://dx.doi.org/10.1007/s40266-014-0200-6>
366. Sohn MW, Meadows JL, Oh EH, et al. Statin use and lower extremity amputation risk in nonelderly diabetic patients. *Journal of Vascular Surgery* 2013;58(6):1578-85.e1. doi: <http://dx.doi.org/10.1016/j.jvs.2013.06.069>



367. Stellaard F, von Bergmann K, Sudhop T, et al. The value of surrogate markers to monitor cholesterol absorption, synthesis and bioconversion to bile acids under lipid lowering therapies. *J Steroid Biochem Mol Biol* 2017;169:111-22. doi: <https://dx.doi.org/10.1016/j.jsbmb.2016.03.030>
368. Sternberg Z, Leung C, Sternberg D, et al. Disease modifying therapies modulate cardiovascular risk factors in patients with multiple sclerosis. *Cardiovascular Therapeutics* 2014;32(2):33-39. doi: <http://dx.doi.org/10.1111/1755-5922.12049>
369. Sundboll J, Larsen AP, Veres K, et al. Cardiovascular event rates and trajectories of LDL-cholesterol levels and lipid-lowering therapy in patients with atherosclerotic cardiovascular disease: A population-based cohort study. *Thromb Res* 2019;183:124-30. doi: <https://dx.doi.org/10.1016/j.thromres.2019.09.034>
370. Swindle JP, Ye X, Mallick R, et al. Colesevelam, Ezetimibe, and Patients With Type 2 Diabetes Mellitus: Characteristics and Clinical Outcomes From a Health Care Database. *Annals of Pharmacotherapy* 2014;48(7):847-55. doi: <http://dx.doi.org/10.1177/1060028014531737>
371. Tankova T, Elenkova A, Robeva R, et al. Familial Hypercholesterolaemia in a Bulgarian Population of Patients with Dyslipidaemia and Diabetes: An Observational Study. *Diabetes Therapy* 2020;11(2):453-65. doi: <http://dx.doi.org/10.1007/s13300-019-00748-2>
372. Teoh H, Mendelsohn AA, Goodman SG, et al. Usefulness of statin-ezetimibe combination to reduce the care gap in dyslipidemia management in patients with a high risk of atherosclerotic disease. *American Journal of Cardiology* 2009;104(6):798-804. doi: <https://dx.doi.org/10.1016/j.amjcard.2009.05.019>
373. Toth PP, Foody JM, Tomassini JE, et al. Therapeutic practice patterns related to statin potency and ezetimibe/simvastatin combination therapies in lowering LDL-C in patients with high-risk cardiovascular disease. *Journal of Clinical Lipidology* 2014;8(1):107-16. doi: <http://dx.doi.org/10.1016/j.jacl.2013.09.009>
374. van Delden XM, Huijgen R, Wolmarans KH, et al. LDL-cholesterol target achievement in patients with heterozygous familial hypercholesterolemia at Groote Schuur Hospital: Minority at target despite large reductions in LDL-C. *Atherosclerosis* 2018;277:327-33. doi: <https://dx.doi.org/10.1016/j.atherosclerosis.2018.06.820>
375. Van Staa TP, Carr DF, O'Meara H, et al. Predictors and outcomes of increases in creatine phosphokinase concentrations or rhabdomyolysis risk during statin treatment. *British Journal of Clinical Pharmacology* 2014;78(3):649-59. doi: <http://dx.doi.org/10.1111/bcp.12367>
376. Wasmuth S, Rohe K, Noack F, et al. Adherence To Lipid-Lowering Therapy In Patients With Coronary Heart Disease From The State Of Saxony-Anhalt, Germany. *Vasc Health Risk Manag* 2019;15:477-83. doi: <https://dx.doi.org/10.2147/VHRM.S197089>

377. Xanthopoulou I, Davlouros P, Siahos S, et al. First-line treatment patterns and lipid target levels attainment in very high cardiovascular risk outpatients. *Lipids in Health and Disease* 2013;12(1) doi: <http://dx.doi.org/10.1186/1476-511X-12-170>
378. Zhao YY, Weir MA, Manno M, et al. New fibrate use and acute renal outcomes in elderly adults a population-based study. *Annals of Internal Medicine* 2012;156(8):560-69. doi: <http://dx.doi.org/10.7326/0003-4819-156-8-201204170-00401>
379. Dai YY, Zhang HS, Zhang XG, et al. Statin-ezetimibe versus statin lipid-lowering therapy in patients with acute coronary syndromes undergoing percutaneous coronary intervention. *Journal of Thoracic Disease* 2017;9(5):1345-52. doi: <http://dx.doi.org/10.21037/jtd.2017.05.46>
380. Ballantyne CM, Lipka LJ, Sager PT, et al. Long-term safety and tolerability profile of ezetimibe and atorvastatin coadministration therapy in patients with primary hypercholesterolaemia. *International journal of clinical practice* 2004;58(7):653-58. doi: 10.1111/j.1368-5031.2004.00278.x
381. Kastelein JJ, Akdim F, Stroes ES, et al. Simvastatin with or without ezetimibe in familial hypercholesterolemia. *New England journal of medicine* 2008;358(14):1431-43. doi: 10.1056/NEJMoa0800742
382. Hagiwara N, Kawada-Watanabe E, Koyanagi R, et al. Low-density lipoprotein cholesterol targeting with pitavastatin + ezetimibe for patients with acute coronary syndrome and dyslipidaemia: the HIJ-PROPER study, a prospective, open-label, randomized trial. *European Heart Journal* 2017;38(29):2264-76. doi: <https://dx.doi.org/10.1093/eurheartj/ehx162>
383. Cannon CP, Blazing MA, Giugliano RP, et al. Ezetimibe Added to Statin Therapy after Acute Coronary Syndromes. *New England Journal of Medicine* 2015;372(25):2387-97. doi: <https://dx.doi.org/10.1056/NEJMoa1410489>
384. Kinouchi K, Ichihara A, Bokuda K, et al. Effects of adding ezetimibe to fluvastatin on kidney function in patients with hypercholesterolemia: a randomized control trial. *Journal of atherosclerosis and thrombosis* 2013;20(3):245-56. doi: 10.5551/jat.14860
385. Kouvelos GN, Arnaoutoglou EM, Matsagkas MI, et al. Effects of rosuvastatin with or without ezetimibe on clinical outcomes in patients undergoing elective vascular surgery: results of a pilot study. *Journal of cardiovascular pharmacology and therapeutics* 2013;18(1):5-12. doi: 10.1177/1074248412445506
386. Liu Z, Hao H, Yin C, et al. Therapeutic effects of atorvastatin and ezetimibe compared with double-dose atorvastatin in very elderly patients with acute coronary syndrome. *Oncotarget* 2017;8(25):41582-89. doi: 10.18632/oncotarget.15078
387. Luo P, Li L, Wang LX, et al. Effects of atorvastatin in combination with ezetimibe on carotid atherosclerosis in elderly patients with hypercholesterolemia. *Genet Mol Res* 2014;13(2):2377-84. doi: <https://dx.doi.org/10.4238/2014.April.3.10>

388. Luo P, Wang L, Zhu H, et al. Impact of atorvastatin combined with ezetimibe for the treatment of carotid atherosclerosis in patients with coronary heart disease. *Acta cardiologica sinica* 2016;32(5):578-85. doi: 10.6515/ACS20151013H
389. Okada K, Iwahashi N, Endo T, et al. Long-term effects of ezetimibe-plus-statin therapy on low-density lipoprotein cholesterol levels as compared with double-dose statin therapy in patients with coronary artery disease. *Atherosclerosis* 2012;224(2):454-56. doi: 10.1016/j.atherosclerosis.2012.07.036
390. Ren Y, Zhu H, Fan Z, et al. Comparison of the effect of rosuvastatin versus rosuvastatin/ezetimibe on markers of inflammation in patients with acute myocardial infarction. *Experimental and therapeutic medicine* 2017;14(5):4942-50. doi: 10.3892/etm.2017.5175
391. Sakamoto K, Kawamura M, Watanabe T, et al. Effect of ezetimibe add-on therapy over 52 weeks extension analysis of prospective randomized trial (RESEARCH study) in type 2 diabetes subjects. *Lipids in health and disease* 2017;16(1):122. doi: 10.1186/s12944-017-0508-4
392. Tsujita K, Sugiyama S, Sumida H, et al. Impact of Dual Lipid-Lowering Strategy With Ezetimibe and Atorvastatin on Coronary Plaque Regression in Patients With Percutaneous Coronary Intervention: the Multicenter Randomized Controlled PRECISE-IVUS Trial. *Journal of the American College of Cardiology* 2015;66(5):495-507. doi: 10.1016/j.jacc.2015.05.065
393. Meaney A, Ceballos G, Asbun J, et al. The VYtorin on Carotid intima-media thickness and overall arterial rigidity (VYCTOR) study. *Journal of clinical pharmacology* 2009;49(7):838-47. doi: 10.1177/0091270009337011
394. Wang X, Zhao X, Li L, et al. Effects of Combination of Ezetimibe and Rosuvastatin on Coronary Artery Plaque in Patients with Coronary Heart Disease. *Heart, lung & circulation* 2016;25(5):459-65. doi: 10.1016/j.hlc.2015.10.012
395. Wang J, Ai XB, Wang F, et al. Efficacy of ezetimibe combined with atorvastatin in the treatment of carotid artery plaque in patients with type 2 diabetes mellitus complicated with coronary heart disease. *International angiology* 2017;36(5):467-73. doi: 10.23736/S0392-9590.17.03818-4
396. West AM, Anderson JD, Meyer CH, et al. The effect of ezetimibe on peripheral arterial atherosclerosis depends upon statin use at baseline. *Atherosclerosis* 2011;218(1):156-62. doi: <http://dx.doi.org/10.1016/j.atherosclerosis.2011.04.005>
397. Nissen SE, Stroes E, Dent-Acosta RE, et al. Efficacy and Tolerability of Evolocumab vs Ezetimibe in Patients With Muscle-Related Statin Intolerance: the GAUSS-3 Randomized Clinical Trial. *JAMA* 2016;315(15):1580-90. doi: 10.1001/jama.2016.3608
398. Landray M, Baigent C, Leaper C, et al. The second United Kingdom Heart and Renal Protection (UK-HARP-II) study: A randomized controlled study of the biochemical safety and efficacy of adding ezetimibe to simvastatin as initial therapy among patients with CKD. *American Journal of Kidney Diseases* 2006;47(3):385-95. doi: <http://dx.doi.org/10.1053/j.ajkd.2005.11.018>

399. Loomba R, Sirlin CB, Ang B, et al. Ezetimibe for the treatment of nonalcoholic steatohepatitis: assessment by novel magnetic resonance imaging and magnetic resonance elastography in a randomized trial (MOZART trial). *Hepatology* 2015;61(4):1239-50. doi: <https://dx.doi.org/10.1002/hep.27647>
400. Masana L, Mata P, Gagne C, et al. Long-term safety and, tolerability profiles and lipid-modifying efficacy of ezetimibe coadministered with ongoing simvastatin treatment: a multicenter, randomized, double-blind, placebo-controlled, 48-week extension study. *Clinical Therapeutics* 2005;27(2):174-84.
401. Moriarty PM, Thompson PD, Cannon CP, et al. Efficacy and safety of alirocumab vs ezetimibe in statin-intolerant patients, with a statin rechallenge arm: the ODYSSEY ALTERNATIVE randomized trial. *Journal of clinical lipidology* 2015;9(6):758-69. doi: 10.1016/j.jacl.2015.08.006
402. Cannon CP, Cariou B, Blom D, et al. Efficacy and safety of alirocumab in high cardiovascular risk patients with inadequately controlled hypercholesterolaemia on maximally tolerated doses of statins: the ODYSSEY COMBO II randomized controlled trial. *European Heart Journal* 2015;36(19):1186-94. doi: <https://dx.doi.org/10.1093/eurheartj/ehv028>
403. Han Y, Chen J, Chopra VK, et al. ODYSSEY EAST: Alirocumab efficacy and safety vs ezetimibe in high cardiovascular risk patients with hypercholesterolemia and on maximally tolerated statin in China, India, and Thailand. *Journal of Clinical Lipidology* 2020;14(1):98-108.e8. doi: <http://dx.doi.org/10.1016/j.jacl.2019.10.015>
404. Bays H, Gaudet D, Weiss R, et al. Alirocumab as Add-On to Atorvastatin Versus Other Lipid Treatment Strategies: ODYSSEY OPTIONS I Randomized Trial. *Journal of clinical endocrinology and metabolism* 2015;100(8):3140-48. doi: 10.1210/jc.2015-1520
405. Farnier M, Jones P, Severance R, et al. Efficacy and safety of adding alirocumab to rosuvastatin versus adding ezetimibe or doubling the rosuvastatin dose in high cardiovascular-risk patients: the ODYSSEY OPTIONS II randomized trial. *Atherosclerosis* 2016;244:138-46. doi: 10.1016/j.atherosclerosis.2015.11.010
406. Roth EM, Taskinen MR, Ginsberg HN, et al. Monotherapy with the PCSK9 inhibitor alirocumab versus ezetimibe in patients with hypercholesterolemia: results of a 24 week, double-blind, randomized Phase 3 trial. *International journal of cardiology* 2014;176(1):55-61. doi: 10.1016/j.ijcard.2014.06.049
407. Saito I, Azuma K, Kakikawa T, et al. A randomized, double-blind, placebo-controlled study of the effect of ezetimibe on glucose metabolism in subjects with type 2 diabetes mellitus and hypercholesterolemia. *Lipids in health and disease* 2015;14:40. doi: 10.1186/s12944-015-0036-z
408. Taylor AJ, Villines TC, Stanek EJ, et al. Extended-release niacin or ezetimibe and carotid intima-media thickness. *New England journal of medicine* 2009;361(22):2113-22. doi: 10.1056/NEJMoa0907569
409. Yokote K, Kanada S, Matsuoka O, et al. Efficacy and safety of bococizumab (RN316/PF-04950615), a monoclonal antibody against proprotein convertase

- subtilisin/kexin type 9, in hypercholesterolemic Japanese subjects receiving a stable dose of atorvastatin or treatment-naive: Results from a randomized, placebo-controlled, dose-ranging study. *Circulation Journal* 2017;81(10):1496-505. doi: <http://dx.doi.org/10.1253/circj.CJ-16-1310>
410. McKenney JM, Farnier M, Lo KW, et al. Safety and efficacy of long-term co-administration of fenofibrate and ezetimibe in patients with mixed hyperlipidemia. *Journal of the american college of cardiology* 2006;47(8):1584-87. doi: 10.1016/j.jacc.2005.11.072
411. Masuda J, Tanigawa T, Yamada T, et al. Effect of combination therapy of ezetimibe and rosuvastatin on regression of coronary atherosclerosis in patients with coronary artery disease. *International heart journal* 2015;56(3):278-85. doi: 10.1536/ihj.14-311
412. Jackowska P, Pytel E, Koter-Michalak M, et al. The Effect of Combined Ezetimibe/Atorvastatin Therapy vs. Atorvastatin Monotherapy on the Erythrocyte Membrane Structure in Patients with Coronary Artery Disease: a Pilot Study. *Advances in clinical and experimental medicine : official organ wroclaw medical university* 2016;25(3):433-39. doi: 10.17219/acem/34791
413. Jackowska P, Chałubiński M, Łuczak E, et al. The influence of statin monotherapy and statin-ezetimibe combined therapy on FoxP3 and IL 10 mRNA expression in patients with coronary artery disease. *Advances in clinical and experimental medicine : official organ wroclaw medical university* 2019;28(9):1243-48. doi: 10.17219/acem/108627
414. Habara M, Nasu K, Terashima M, et al. Impact on optical coherence tomographic coronary findings of fluvastatin alone versus fluvastatin + ezetimibe. *American journal of cardiology* 2014;113(4):580-87. doi: 10.1016/j.amjcard.2013.10.038
415. Gaudiani LM, Lewin A, Meneghini L, et al. Efficacy and safety of ezetimibe co-administered with simvastatin in thiazolidinedione-treated type 2 diabetic patients. *Diabetes, obesity & metabolism* 2005;7(1):88-97. doi: 10.1111/j.1463-1326.2004.00420.x
416. Dagli N, Yavuzkir M, Karaca I. The effects of high dose pravastatin and low dose pravastatin and ezetimibe combination therapy on lipid, glucose metabolism and inflammation. *Inflammation* 2007;30(6):230-35. doi: 10.1007/s10753-007-9041-3
417. Arimura T, Miura S, Ike A, et al. Comparison of the efficacy and safety of statin and statin/ezetimibe therapy after coronary stent implantation in patients with stable angina. *Journal of cardiology* 2012;60(2):111-18. doi: 10.1016/j.jjcc.2012.03.002
418. Nakou ES, Filippatos TD, Georgoula M, et al. The effect of orlistat and ezetimibe, alone or in combination, on serum LDL and small dense LDL cholesterol levels in overweight and obese patients with hypercholesterolaemia. *Current medical research and opinion* 2008;24(7):1919-29. doi: 10.1185/03007990802177150
419. Pisciotto L, Bellocchio A, Bertolini S. Nutraceutical pill containing berberine versus ezetimibe on plasma lipid pattern in hypercholesterolemic subjects and its

- additive effect in patients with familial hypercholesterolemia on stable cholesterol-lowering treatment. *Lipids in health and disease* 2012;11:123. doi: 10.1186/1476-511X-11-123
420. Takase S, Matoba T, Nakashiro S, et al. Ezetimibe in Combination With Statins Ameliorates Endothelial Dysfunction in Coronary Arteries After Stenting: the CuVIC Trial (Effect of Cholesterol Absorption Inhibitor Usage on Target Vessel Dysfunction After Coronary Stenting), a Multicenter Randomized Controlled Trial. *Arteriosclerosis, thrombosis, and vascular biology* 2017;37(2):350-58. doi: 10.1161/ATVBAHA.116.308388
421. Oh M, Kim H, Shin EW, et al. Comparison of High-Dose Rosuvastatin Versus Low-Dose Rosuvastatin Plus Ezetimibe on Carotid Atherosclerotic Plaque Inflammation in Patients with Acute Coronary Syndrome. *J Cardiovasc Transl Res* 2020;04:04. doi: <https://dx.doi.org/10.1007/s12265-020-10009-4>
422. Takeshita Y, Takamura T, Honda M, et al. The effects of ezetimibe on non-alcoholic fatty liver disease and glucose metabolism: a randomised controlled trial. *Diabetologia* 2014;57(5):878-90. doi: 10.1007/s00125-013-3149-9
423. Shaw SM, Chaggar P, Ritchie J, et al. The efficacy and tolerability of ezetimibe in cardiac transplant recipients taking cyclosporin. *Transplantation* 2009;87(5):771-75. doi: 10.1097/TP.0b013e318198d7d0
424. Strony J, Yang B, Hanson ME, et al. Long-term safety and tolerability of ezetimibe coadministered with simvastatin in hypercholesterolemic patients: a randomized, 12-month double-blind extension study. *Current medical research and opinion* 2008;24(11):3149-57. doi: 10.1185/03007990802426581
425. Nakou E, Babageorgakas P, Bouchliou I, et al. Statin-induced immunomodulation alters peripheral invariant natural killer T-cell prevalence in hyperlipidemic patients. *Cardiovascular drugs and therapy / sponsored by the International Society of Cardiovascular Pharmacotherapy* 2012;26(4):293-99. doi: 10.1007/s10557-012-6387-z
426. Miklishanskaya SV, Vlasik TN, Kheimets GI, et al. The possibility of reducing the Lp-PLA2 mass level using simvastatin monotherapy and combination therapy with ezetimibe. *Cor ET vasa* 2015;57(4):e257-e64. doi: 10.1016/j.crvasa.2015.03.012
427. Bajaj HS, Brown RE, Jiandani D, et al. Goal achievement of HbA1c and LDL-cholesterol in a randomized trial comparing colesevelam with ezetimibe: GOAL-RCT. *Diabetes, Obesity & Metabolism* 2020;22(10):1722-28. doi: <https://dx.doi.org/10.1111/dom.14084>
428. Battaggia A, Donzelli A, Font M, et al. Clinical efficacy and safety of Ezetimibe on major cardiovascular endpoints: systematic review and meta-analysis of randomized controlled trials. *PLoS One* 2015;10(4):e0124587. doi: 10.1371/journal.pone.0124587 [published Online First: 2015/04/29]
429. Savarese G, De Ferrari GM, Rosano GM, et al. Safety and efficacy of ezetimibe: A meta-analysis. *Int J Cardiol* 2015;201:247-52. doi: 10.1016/j.ijcard.2015.08.103 [published Online First: 2015/08/25]

430. Zhao Z, Du S, Shen S, et al. Comparative efficacy and safety of lipid-lowering agents in patients with hypercholesterolemia: A frequentist network meta-analysis. *Medicine (Baltimore)* 2019;98(6):e14400. doi: 10.1097/md.00000000000014400 [published Online First: 2019/02/09]
431. Chaiyasothi T, Nathisuwan S, Dilokthornsakul P, et al. Effects of Non-statin Lipid-Modifying Agents on Cardiovascular Morbidity and Mortality Among Statin-Treated Patients: A Systematic Review and Network Meta-Analysis. *Front Pharmacol* 2019;10:547. doi: 10.3389/fphar.2019.00547 [published Online First: 2019/06/14]
432. Davidson MH, Maccubbin D, Stepanavage M, et al. Striated muscle safety of ezetimibe/simvastatin (Vytorin). *Am J Cardiol* 2006;97(2):223-8. doi: 10.1016/j.amjcard.2005.08.038 [published Online First: 2006/01/31]
433. Pandor A, Ara RM, Tumur I, et al. Ezetimibe monotherapy for cholesterol lowering in 2,722 people: systematic review and meta-analysis of randomized controlled trials. *J Intern Med* 2009;265(5):568-80. doi: 10.1111/j.1365-2796.2008.02062.x [published Online First: 2009/01/15]
